# Supplementary material
Source: PubMed Central journal article supplement (PMC2566532)

# Supporting Information

## Formal Total Synthesis of the Cytotoxic Marine Ascidian Alkaloid Haouamine A

Jeannie H. Jeong, and Steven M. Weinreb\*

*Department of Chemistry, The Pennsylvania State University  
University Park, Pennsylvania 16802*

*smw@chem.psu.edu*

### **Table of Contents**

|                                                             |        |
|-------------------------------------------------------------|--------|
| Title page                                                  | S1     |
| Experimental details of compounds <b>8-17</b>               | S2-S7  |
| Experimental details of compounds <b>24-26</b> and <b>3</b> | S7-S10 |
| Spectral Data of compounds <b>6-17</b>                      | S11-36 |
| NMR Spectra of compounds <b>23-26</b> and <b>3</b>          | S37-54 |

**General Methods.** All non-aqueous reactions were carried out under an inert atmosphere of argon or nitrogen in flame-dried glassware. Air and moisture sensitive liquid reagents were added via a dry syringe or cannula. Anhydrous tetrahydrofuran (THF), dichloromethane (CH<sub>2</sub>Cl<sub>2</sub>), diethyl ether (Et<sub>2</sub>O) and toluene (PhMe) were obtained from a solvent dispensing system. All other solvents and reagents were used as obtained from commercial sources without further purification. Flash column chromatography was performed using EM Science silica gel 60 (230-400 mesh) or Aldrich basic alumina Brockmann I (~150 mesh). Analytical and preparative thin layer chromatography (TLC) were performed on EM Science silica gel 60 PF<sub>254</sub> plates. <sup>1</sup>H and <sup>13</sup>C NMR spectral data were recorded on Bruker DPX-300, CPDX-300, AMX-360, or DRX-400 MHz spectrometers. Infrared spectral data were obtained using a Perkin-Elmer 1600 FTIR.

**[2-(2-Hydroxyethyl)-6-methoxyphenyl]-(3-hydroxyphenyl)methanone (8).** 3-Methoxyphenylmagnesium bromide (**7**, Aldrich, 1 M in THF, 18.7 mL) was added slowly to isocoumarin **6**<sup>7</sup> (3.01 g, 17.0 mmol) in CH<sub>2</sub>Cl<sub>2</sub> (30 mL) at -78 °C and the mixture was allowed to gradually warm to rt overnight. The mixture was quenched with saturated aqueous NH<sub>4</sub>Cl (12 mL) and extracted with CH<sub>2</sub>Cl<sub>2</sub> (3 x 12 mL). The combined organic layers were dried over Na<sub>2</sub>SO<sub>4</sub> and concentrated *in vacuo*. The residue was purified by flash column chromatography on silica gel (50:50 EtOAc/hexanes) to afford ketoalcohol **8** as a colorless oil (4.77 g, 98%). IR (thin film) 3422, 1667, 1581, 1469, 1262 cm<sup>-1</sup>; <sup>1</sup>H NMR (300 MHz, CDCl<sub>3</sub>) δ 2.33 (bs, 1H, OH), 2.57 (t, *J* = 6.6 Hz, 2H), 3.55 (s, 3H), 3.63 (t, *J* = 6.6 Hz, 2H), 3.73 (s, 3H), 6.75 (d, *J* = 8.3 Hz, 1H), 6.85 (d, *J* = 7.5 Hz, 1H), 7.01 (dt, *J* = 7.0, 2.4 Hz, 1H), 7.16-7.20 (m, 2H), 7.26 (t, *J* = 8.0 Hz, 1H), 7.35-7.36 (m, 1H); <sup>13</sup>C NMR (75 MHz, CDCl<sub>3</sub>) δ 36.2, 55.5, 55.8, 63.3, 109.1, 113.0,

120.3, 122.6, 122.8, 129.3, 129.6, 130.6, 137.8, 139.0, 156.9, 159.9, 198.3; HRMS  $m/z$  calcd for  $C_{17}H_{19}O_4$  287.1278 ( $MH^+$ ), found 287.1281.

**{2-[2-(*tert*-Butyldimethylsilanyloxy)ethyl]-6-methoxyphenyl}-(3-methoxyphenyl)-methanone (9).** Imidazole (3.40 g, 50.0 mmol) and TBSCl (5.02 g, 33.32 mmol) were added to ketoalcohol **8** (4.77 g, 16.67 mmol) in  $CH_2Cl_2$  (33 mL) and the mixture was stirred for 2 h at rt. The reaction mixture was diluted with  $H_2O$  (35 mL) and extracted with  $CH_2Cl_2$  (3 x 35 mL). The combined organic layers were dried over  $Na_2SO_4$ , and concentrated *in vacuo*. The residue was purified by flash column chromatography on silica gel (15:85 EtOAc/hexanes) to yield ketone **9** as a white solid (6.67 g, 100%).  $^1H$  NMR (300 MHz,  $CDCl_3$ )  $\delta$  0.00 (s, 6H), 0.78 (s, 9H), 2.1 (t,  $J = 7.4$  Hz, 2H), 3.64 (t,  $J = 7.4$  Hz, 2H), 3.66 (s, 3H), 3.83 (s, 3H), 6.81 (d,  $J = 8.0$  Hz, 1H), 6.91 (d,  $J = 7.7$  Hz, 1H), 7.09 (dt,  $J = 6.8, 1.6$  Hz, 1H), 7.25 (s, 1H), 7.27-7.30 (m, 3H), 7.45 (t,  $J = 1.6$  Hz, 1H);  $^{13}C$  NMR (75 MHz,  $CDCl_3$ )  $\delta$  -5.4, 26.0, 36.8, 55.5, 55.7, 64.0, 108.9, 112.9, 120.2, 122.8, 123.1, 129.3, 129.6, 129.9, 137.4, 139.1, 156.7, 159.9, 197.6; HRMS  $m/z$  calcd for  $C_{23}H_{32}O_4NaSi$  423.1968 ( $M+Na^+$ ), found 423.1953.

**2-{3-Methoxy-2-[1-(3-methoxyphenyl)vinyl]phenyl}ethanol (10).** The Tebbe-Petasis reagent<sup>8</sup> (0.5M in 50:50 THF/toluene, 1.6 mL) was added to a solution of ketone **9** (125 mg, 312  $\mu$ mol) in toluene (1.5 mL). The mixture was heated in an oil bath maintained at 120 °C for 15 h. After cooling the mixture to 40 °C, saturated aqueous  $NaHCO_3$  (1.5 mL) and MeOH (1.5 mL) were added to destroy the excess Tebbe-Petasis reagent. The mixture was stirred for an additional 1 h at 40 °C and extracted with  $Et_2O$  (3 x 1 mL) after cooling to rt. The combined organic layers were dried over  $Na_2SO_4$ , and concentrated *in vacuo*. The residue was purified by flash column chromatography on silica gel (20:80 EtOAc/hexanes) to give olefin **10** as a pale

yellow oil (111 mg, 91%). <sup>1</sup>H NMR (300 MHz, CDCl<sub>3</sub>) δ 0.00 (s, 6H), 0.89 (s, 9H), 2.77-2.83 (m, 2H), 3.66-3.72 (m, 2H), 3.73 (s, 3H), 3.79 (s, 3H), 5.22 (d, *J* = 1.3 Hz, 1H), 6.06 (d, *J* = 1.3 Hz, 1H), 6.80-6.86 (m, 2H), 6.91-6.95 (m, 2H), 6.98 (dd, *J* = 7.7, 0.9 Hz, 1H), 7.22 (t, *J* = 8.2 Hz, 1H), 7.24 (t, *J* = 8.0 Hz, 1H); <sup>13</sup>C NMR (75 MHz, CDCl<sub>3</sub>) δ -5.2, 18.5, 25.8, 26.1, 37.0, 55.2, 55.9, 64.5, 108.9, 112.0, 112.8, 115.6, 118.8, 122.8, 128.2, 129.3, 130.6, 138.5, 141.6, 143.8, 157.3, 159.7.

***tert*-Butyl-(2-{3-methoxy-2-[1-(3-methoxyphenyl)vinyl]phenyl}ethoxy)-dimethylsilane (11).** TBAF (1 M in THF, 3.18 mL) was added to silylether olefin **10** (1.15 g, 2.89 mmol) in THF (29 mL) and the mixture was stirred at rt for 2 h. Saturated aqueous NH<sub>4</sub>Cl (20 mL) was added and the mixture was extracted with CH<sub>2</sub>Cl<sub>2</sub> (3 x 20 mL). The combined organic layers were dried over MgSO<sub>4</sub>, and concentrated *in vacuo*. The residue was purified by flash column chromatography on silica gel (20:80 EtOAc/hexanes) to afford hydroxy olefin **11** as a pale yellow oil (0.82 g, 100%). <sup>1</sup>H NMR (300 MHz, CDCl<sub>3</sub>) δ 1.68 (bs, 1H), 2.77-2.81 (m, 2H), 3.68-3.71 (m, 2H), 3.73 (s, 3H), 3.78 (s, 3H), 5.19 (d, *J* = 1.2 Hz, 1H), 6.03 (d, *J* = 1.2 Hz, 1H), 6.82 (ddd, *J* = 8.2, 2.5, 0.9 Hz, 1H), 6.85-6.93 (m, 3H), 6.95 (dd, *J* = 7.7, 0.8 Hz, 1H), 7.21 (t, *J* = 7.8 Hz, 1H), 7.30 (t, *J* = 8.0 Hz, 1H); <sup>13</sup>C NMR (75 MHz, CDCl<sub>3</sub>) δ 36.6, 55.3, 56.0, 63.5, 109.2, 112.0, 112.8, 115.9, 118.7, 122.2, 128.4, 129.4, 130.7, 138.1, 141.5, 143.6, 157.4, 159.7; HRMS *m/z* calcd for C<sub>18</sub>H<sub>21</sub>O<sub>3</sub> 285.1469 (MH<sup>+</sup>), found 285.1485.

**{3-Methoxy-2-[1-(3-methoxyphenyl)vinyl]phenyl}acetaldehyde (12).** Dess-Martin periodinane<sup>10</sup> (0.82 g, 1.93 mmol) was added to hydroxy olefin **11** (0.50 g, 1.75 mmol) in CH<sub>2</sub>Cl<sub>2</sub> (18 mL) at 0 °C. The mixture was stirred at rt for 1 h. Aqueous NaOH (2 M, 30 mL) was added to the reaction mixture which was extracted with CH<sub>2</sub>Cl<sub>2</sub> (3 x 35 mL). The residue was purified

by flash column chromatography on silica gel (14:86 EtOAc/hexanes) to yield aldehyde **12** as a white translucent gum (0.39 g, 79%). <sup>1</sup>H NMR (300 MHz, CDCl<sub>3</sub>) δ 3.55 (d, *J* = 2.0 Hz, 2H), 3.71 (s, 3H), 3.75 (s, 3H), 5.12 (d, *J* = 1.2 Hz, 1H), 5.98 (d, *J* = 1.1 Hz, 1H), 6.76-6.81 (m, 2H), 6.82-6.86 (m, 2H), 6.91 (dd, *J* = 8.3, 0.8 Hz, 1H), 7.14 (dt, *J* = 7.6, 1.1 Hz, 1H), 7.31 (dd, *J* = 8.2, 7.7 Hz, 1H), 9.54 (t, *J* = 2.1 Hz, 1H); <sup>13</sup>C NMR (75 MHz, CDCl<sub>3</sub>) δ 48.6, 55.6, 56.4, 110.6, 112.4, 113.3, 117.0, 119.0, 123.2, 129.2, 129.8, 131.5, 132.7, 141.3, 143.7, 158.0, 160.1, 200.1.

**Nitrone Cycloaddition Procedure. Method 1.** Et<sub>3</sub>N (0.44 mL, 3.14 mmol) was added to a solution of benzylhydroxylamine hydrochloride (0.47 g, 2.88 mmol) in toluene (1.0 mL) with Na<sub>2</sub>SO<sub>4</sub> (0.10 g) and the mixture was stirred for 30 min at rt. Aldehyde **12** (0.74 g, 2.62 mmol) in toluene (2.6 mL) was added to the solution. The mixture was stirred for an additional 1 h and then heated at 115 °C for 36 h. Concentration of the reaction mixture *in vacuo* gave a residue that was partitioned between brine (15 mL) and CH<sub>2</sub>Cl<sub>2</sub> (10 mL) and extracted with CH<sub>2</sub>Cl<sub>2</sub> (3 x 10 mL). The combined organic layers were dried over Na<sub>2</sub>SO<sub>4</sub>, and concentrated *in vacuo*. The residue was purified by flash column chromatography on silica gel (10:90 EtOAc/hexanes) to yield **14** (640 mg, 63%) and 315 mg of an impure fraction containing **15**. The impure mixture containing the bridged cycloadduct **15** was heated in toluene (10 mL) at 115 °C for 24 h to give additional linear product **14** (769 mg, 76% total yield).

**Method 2.** Et<sub>3</sub>N (0.44 mL, 3.14 mmol) was added to a solution of benzylhydroxylamine hydrochloride (0.47 g, 2.88 mmol) in toluene (1.0 mL) along with Na<sub>2</sub>SO<sub>4</sub> (0.10 g) and the mixture was stirred for 30 min at rt. Aldehyde **12** (0.74 g, 2.62 mmol) in toluene (2.6 mL) was added to the solution. The mixture was stirred for an additional 1 h and then filtered. The filtrate was heated in an oil bath maintained at 130 °C for 45 h. The reaction mixture was concentrated *in vacuo*. The resulting residue was partitioned between brine (15 mL) and CH<sub>2</sub>Cl<sub>2</sub>

(10 mL) and extracted with CH<sub>2</sub>Cl<sub>2</sub> (3 x 10 mL). The combined organic layers were dried over Na<sub>2</sub>SO<sub>4</sub>, and concentrated *in vacuo*. The mixture was purified by flash column chromatography on silica gel (20:80 EtOAc/hexanes) to afford isoxazolidine **14** as a white solid (0.60 g, 73%).

**1-Benzyl-4-methoxy-3a-(3-methoxyphenyl)-3,3a,8,8a-tetrahydro-1H-indeno[2,1-c]isoxazole (14)**. White solid, mp 109-111 °C; <sup>1</sup>H NMR (300 MHz, CDCl<sub>3</sub>) δ 2.62 (d, *J* = 17.1 Hz, 1H), 2.97 (dd, *J* = 17.0, 6.4 Hz, 1H), 3.39 (d, *J* = 6.3 Hz, 1H), 3.62 (s, 3H), 3.67 (s, 3H), 4.04 (s, 2H), 4.11 (d, *J* = 9.0 Hz, 1H), 4.57 (d, *J* = 9.0 Hz, 1H), 6.70-6.75 (m, 4H), 6.77 (d, *J* = 7.6 Hz, 1H), 7.13-7.32 (m, 6), 7.32 (dd, *J* = 7.8, 1.2 Hz, 1H); <sup>13</sup>C NMR (75 MHz, CDCl<sub>3</sub>) δ 35.2, 55.4 (2), 61.3, 70.1, 76.8, 77.2, 77.7, 80.0, 82.5, 109.1, 111.3, 117.8, 119.0, 127.5, 128.5 (2), 129.3 (2), 129.8, 133.0, 144.3, 146.8, 156.5, 159.7; HRMS *m/z* calcd for C<sub>24</sub>H<sub>35</sub>O<sub>3</sub>Si 388.1895 (MH<sup>+</sup>), found 388.1907. Suitable crystals for X-ray analysis were obtained by the slow evaporation of a 1:1 pentane/ Et<sub>2</sub>O solution.

**[2-Amino-7-methoxy-1-(3-methoxyphenyl)indan-1-yl]methanol (16)**. 10% Pd(OH)<sub>2</sub>/C (1.05 g) was added to a solution of isoxazolidine **14** (2.10 g, 5.17 mmol) in 1:1 CH<sub>2</sub>Cl<sub>2</sub>/methanol (50 mL). The mixture was stirred under one atmosphere of H<sub>2</sub> at rt for 12 h, filtered through a pad of Celite, and concentrated *in vacuo* to yield a translucent gum (1.45 g, 94%). The resulting amino alcohol was used without further purification. <sup>1</sup>H NMR (400 MHz, CDCl<sub>3</sub>) δ 2.46 (bs, 2H), 2.65 (dd, *J* = 15.7, 5.3 Hz, 1H), 3.12 (dd, *J* = 15.7, 6.8 Hz, 1H), 3.63 (s, 3H), 3.71 (s, 3H), 3.80 (dd, *J* = 6.8, 5.4 Hz, 1H), 4.27 (d, *J* = 11.4 Hz, 1H), 4.37 (d, *J* = 11.5 Hz, 1H), 6.73-6.78 (m, 4H), 6.89 (d, *J* = 7.4 Hz, 1H), 7.16 (t, *J* = 8.2 Hz, 1H), 7.23 (t, *J* = 7.8 Hz, 1H).

**1-(tert-Butyldimethylsilanyloxymethyl)-7-methoxy-1-(3-methoxyphenyl)-indan-2-ylamine (17).** TBSCl (0.86 g, 5.69 mmol) and imidazole (0.40 g, 5.83 mmol) were added to amino alcohol **16** (1.45 g, 4.86 mmol) in DMF/CH<sub>2</sub>Cl<sub>2</sub> (40:60, 50 mL), and the mixture was stirred for 12 h at rt. The reaction mixture was diluted with H<sub>2</sub>O (50 mL) and extracted with Et<sub>2</sub>O (3 x 50 mL). The combined organic layers were washed with H<sub>2</sub>O (50 mL), dried over Na<sub>2</sub>SO<sub>4</sub> and concentrated *in vacuo*. The residue was purified by flash column chromatography on silica gel (25:75 EtOAc/hexanes) to give amino silyl ether **17** as a colorless gum (1.99 g, 99%). <sup>1</sup>H NMR (400 MHz, CDCl<sub>3</sub>) δ -0.31 (s, 3H), -0.11 (s, 3H), 0.74 (s, 9H), 1.78 (bs, 2H), 2.75 (dd, *J* = 15.4, 7.6 Hz, 1H), 3.14 (dd, *J* = 15.5, 7.9 Hz, 1H), 3.57 (s, 3H), 3.70 (t, *J* = 7.5 Hz, 1H), 3.71 (s, 3H), 4.19 (d, *J* = 9.8 Hz, 1H), 4.55 (d, *J* = 9.9 Hz, 1H), 6.67 (d, *J* = 8.3 Hz, 1H), 6.68-6.75 (m, 3H), 6.82 (d, *J* = 7.4 Hz, 1H), 7.13 (t, *J* = 7.9 Hz, 1H), 7.20 (t, *J* = 7.8 Hz, 1H); <sup>13</sup>C NMR (75 MHz, CDCl<sub>3</sub>) δ -5.9, -5.7, 18.1, 25.9, 42.2, 55.0, 55.3, 60.5, 109.0, 110.6, 113.0, 117.3, 119.0, 128.9 (2C), 132.1, 145.5, 147.7, 157.0, 159.5; HRMS *m/z* calcd for C<sub>24</sub>H<sub>36</sub>NO<sub>3</sub>Si 414.2464 (MH<sup>+</sup>), found 414.2469.

**2-(2-Bromo-5-methoxyphenyl)-N-[1-(tert-butyl-dimethylsilanyloxymethyl)-7-methoxy-1-(3-methoxyphenyl)-indan-2-yl]-acetamide (24).** EDAC (75 mg, 0.383 mmol) was added to phenylacetic acid **23**<sup>12</sup> and amino silyl ether **17** in CH<sub>2</sub>Cl<sub>2</sub> (3.2 mL) at -10 °C. The mixture was allowed to gradually warm to rt overnight. H<sub>2</sub>O (2.5 mL) was added to the reaction mixture and solution was extracted with CH<sub>2</sub>Cl<sub>2</sub> (3 x 3 mL). The combined organic layers were dried over Na<sub>2</sub>SO<sub>4</sub> and concentrated *in vacuo*. The residue was purified by flash column chromatography on silica gel (25:75 EtOAc/hexanes) to afford amide **24** as a white foam (201 mg, 99%). <sup>1</sup>H NMR (300 MHz, CDCl<sub>3</sub>) δ -0.40 (s, 3H), -0.20 (s, 3H), 0.60 (s, 9H), 2.71 (dd, *J* = 15.6, 8.0 Hz, 1H), 3.28 (dd, *J* = 15.7, 8.9 Hz, 1H), 3.55 (s, 3H), 3.66 (s, 3H), 3.67 (s, 2H), 3.77

(s, 3H), 4.25 (AB<sub>q</sub>,  $J = 24.7, 10.1$  Hz, 2H), 4.93 (q,  $J = 8.9$  Hz, 1H), 6.61-6.73 (m, 5H), 6.77 (d,  $J = 6.9$  Hz, 1H), 6.92 (d,  $J = 3.0$  Hz, 1H), 7.09 (t,  $J = 7.9$  Hz, 1H), 7.18 (t,  $J = 7.8$  Hz, 1H), 7.46 (d,  $J = 8.8$  Hz, 1H); <sup>13</sup>C NMR (75 MHz, CDCl<sub>3</sub>) δ 6.2, -5.6, 17.9, 25.8, 40.7, 44.8, 54.8, 55.2, 55.6, 59.8, 60.3, 65.2, 109.1, 111.3, 112.7, 115.3, 115.4, 117.1 (2C), 118.8, 129.0, 129.2, 130.8, 133.7, 136.1, 144.5, 145.8, 156.6, 154.4 (2C), 169.1; HRMS  $m/z$  calcd for C<sub>33</sub>H<sub>42</sub>NO<sub>5</sub>NaSiBr 662.1913 (MNa<sup>+</sup>), found 662.1904.

**2-(2-Bromo-5-methoxyphenyl)-N-[1-formyl-7-methoxy-1-(3-methoxyphenyl)-indan-2-yl]-acetamide (25).** TBAF (1 M in THF, 117 μL) was added to silylether amide **24** (50 mg, 78 μmol) in THF (1.0 mL) and the mixture was stirred at rt for 30 min. Saturated aqueous NH<sub>4</sub>Cl (1 mL) was added and the mixture was extracted with CH<sub>2</sub>Cl<sub>2</sub> (3 x 1 mL). The combined organic layers were dried over MgSO<sub>4</sub>, and concentrated *in vacuo*. The residue was purified by flash column chromatography on silica gel (50:50 EtOAc/hexanes) to yield the alcohol as a white gum (41 mg, 100%). <sup>1</sup>H NMR (300 MHz, CDCl<sub>3</sub>) δ 2.36 (bs, 1H), 2.74 (dd,  $J = 16.5, 1.9$  Hz, 1H), 3.04 (dd,  $J = 16.4, 6.2$  Hz, 1H), 3.62 (s, 2H), 3.67 (s, 3H), 3.74 (s, 3H), 3.75 (s, 3H), 4.16-4.22 (m, 2H), 4.83-4.88 (m, 1H), 6.45-6.46 (m, 1H), 6.57 (d,  $J = 7.8$  Hz, 1H), 6.67 (dd,  $J = 8.8, 3.1$  Hz, 1H), 6.69 (dd,  $J = 8.3, 2.6$  Hz, 1H), 6.82 (d,  $J = 8.1$  Hz, 1H), 6.86 (d,  $J = 3.1$  Hz, 1H), 6.90 (d,  $J = 8.0$  Hz, 1H), 7.11 (t,  $J = 8.0$  Hz, 1H), 7.26-7.31 (m, 1H), 7.39 (d,  $J = 8.8$  Hz, 1H); <sup>13</sup>C NMR (75 MHz, CDCl<sub>3</sub>) δ 39.0, 44.6, 55.3, 55.6, 55.7, 62.3, 62.6, 66.3, 109.4, 111.7, 113.2, 115.1 (2C), 115.6, 117.1, 118.9, 119.2, 129.4, 129.5, 130.0, 133.6, 135.9, 144.3, 145.5, 156.8, 159.2, 159.7, 169.9.

Water (78 μL, 78 μmol) and Dess-Martin periodinane<sup>10</sup> (50 mg, 117 μmol) were added to the above alcohol (41 mg, 78 μmol) in CH<sub>2</sub>Cl<sub>2</sub> (2 mL), and the mixture was stirred at rt for 1 h.



Aqueous NaOH (1 M, 2 mL) was added to the reaction mixture which was then extracted with CH<sub>2</sub>Cl<sub>2</sub> (3 x 2 mL). The residue was purified by flash column chromatography on silica gel (50:50 EtOAc/hexanes) to give aldehyde **25** as a white foam (40 mg, 98%). <sup>1</sup>H NMR (300 MHz, CDCl<sub>3</sub>) δ 2.79 (dd, *J* = 15.8, 7.6 Hz, 1H), 3.27 (dd, *J* = 15.8, 7.8 Hz, 1H), 3.59 (s, 5H), 3.70 (s, 3H), 3.76 (s, 3H), 4.78 (q, *J* = 7.7 Hz, 1H), 6.59 (s, 1H), 6.59 (d, *J* = 3.8 Hz, 1H), 6.71 (dd, *J* = 8.8, 3.1 Hz, 1H), 6.75-6.78 (m, 2H), 6.84 (d, *J* = 3.0 Hz, 1H), 6.87 (d, *J* = 7.5 Hz, 1H), 7.05 (d, *J* = 9.2 Hz, 1H), 7.18 (t, *J* = 8.0 Hz, 1H), 7.28 (t, *J* = 7.6 Hz, 1H), 7.45 (d, *J* = 8.8 Hz, 1H), 9.69 (s, 1H); <sup>13</sup>C NMR (100 MHz, CDCl<sub>3</sub>) δ 38.2, 44.3, 55.3, 55.4, 55.7, 61.4, 69.9, 110.0, 112.7, 113.4, 115.4, 117.0, 118.1, 119.7, 126.1, 129.6, 131.0, 133.7, 135.7, 139.9, 144.7, 156.8, 159.3, 159.9, 169.8, 199.0; HRMS *m/z* calcd for C<sub>27</sub>H<sub>26</sub>NO<sub>5</sub>NaBr 546.0892 (MNa<sup>+</sup>), found 546.0878.

**3-(2-Bromo-5-methoxyphenyl)-5-methoxy-4a-(3-methoxyphenyl)-1,4a,9,9a-tetrahydroindeno[2,1-b]pyridin-2-one (26).** K<sub>2</sub>CO<sub>3</sub> (16 mg, 1.114 mmol) was added to aldehyde **25** (62 mg, 0.118 mmol) in MeOH (10 mL) and the resulting mixture was heated at 60 °C overnight. Concentration of the reaction mixture *in vacuo* gave a residue that was partitioned between brine (10 mL) and CH<sub>2</sub>Cl<sub>2</sub> (10 mL). The aqueous layer was extracted with CH<sub>2</sub>Cl<sub>2</sub> (3 x 10 mL). The combined organic layers were dried over Na<sub>2</sub>SO<sub>4</sub>, and concentrated *in vacuo*. The residue was purified by flash column chromatography on silica gel (66:33:1 hexanes/EtOAc/conc. NH<sub>4</sub>OH) to yield lactam **26** (59 mg, 98%). <sup>1</sup>H NMR (300 MHz, CDCl<sub>3</sub>) δ 3.11 (dd, *J* = 15.6, 6.6 Hz, 1H), 3.34 (dd, *J* = 15.8, 6.9 Hz, 1H), 3.60 (s, 3H), 3.73 (s, 3H), 3.75 (s, 3H), 4.17-4.22 (m, 1H), 6.26 (s, 1H), 6.69-6.80 (m, 5H), 6.89 (d, *J* = 3.0 Hz, 1H), 6.92 (t, *J* = 7.5 Hz, 1H), 7.18-7.24 (m, 1H), 7.29 (t, *J* = 7.7 Hz, 1H), 7.42 (d, *J* = 8.8 Hz, 1H); <sup>13</sup>C NMR (75 MHz, CDCl<sub>3</sub>) δ 40.9, 55.3, 55.4, 55.7, 60.6, 64.6, 110.1, 112.1, 113.2, 114, 6, 115.2, 117.3, 117.6, 119.3, 129.5, 130.0 (2C),

133.2, 134.7, 139.1, 141.1, 143.5, 145.0, 156.7, 158.9, 159.9, 163.7; HRMS  $m/z$  calcd for  $C_{27}H_{42}NO_4NaBr$  528.0786 ( $MNa^+$ ), found 528.0783.

**3-(2-Bromo-5-methoxyphenyl)-5-methoxy-4a-(3-methoxyphenyl)-2,4a,9,9a-tetrahydro-1H-indeno[2,1-b]pyridine (3).**  $LiAlH_4$  (29.7 mg, 782  $\mu$ mol) and  $ZnCl_2$  (0.5 M in THF, 782  $\mu$ L) were added to lactam **26** (33 mg, 65  $\mu$ mol) in THF (5.0 mL) at 0 °C and the mixture was allowed to gradually warm to rt over 1 h. After recooling the reaction mixture to 0 °C, 10%  $H_2SO_4$  (2 mL) was added slowly. The mixture was stirred for approximately 30 min until all of the solids had dissolved. The solution was basified with saturated aqueous  $NaHCO_3$  and extracted with  $CH_2Cl_2$  (3 x 5 mL). The combined organic layers were dried over  $Na_2SO_4$ , and concentrated *in vacuo*. The residue was purified by preparative TLC (66:33:1 hexanes/EtOAc/conc.  $NH_4OH$ ) to afford amine **3** as a white foam (24 mg, 75%): mp 58-61 °C; IR (thin film) 2934, 1588, 1479, 1465, 1289, 1263, 1080, 1052, 1027  $cm^{-1}$ ;  $^1H$  NMR (400 MHz,  $CDCl_3$ )  $\delta$  2.92 (dd,  $J = 16.1, 4.5$  Hz, 1H), 3.15 (dd,  $J = 16.1, 7.0$  Hz, 1H), 3.51 (d,  $J = 17.6$  Hz, 1H), 3.61 (s, 3H), 3.62-3.67 (m, 1H), 3.74 (s, 3H), 3.75 (s, 3H), 3.79 (dd,  $J = 17.7, 2.0$  Hz, 1H), 6.34 (s, 1H), 6.67 (dd,  $J = 8.7, 3.1$  Hz, 1H), 6.71-6.75 (m, 4H), 6.80 (t,  $J = 2.1$  Hz, 1H), 6.92 (d,  $J = 7.5$  Hz, 1H), 7.16 (t,  $J = 7.9$  Hz, 1H), 7.24 (t,  $J = 7.8$  Hz, 1H), 7.41 (d,  $J = 8.7$  Hz, 1H);  $^{13}C$  NMR (100 MHz,  $CDCl_3$ )  $\delta$  36.3, 45.4, 55.4 (2C), 55.7, 66.7, 109.8, 111.5, 113.1, 113.3, 114.4, 116.2, 118.0, 119.7, 129.2, 129.3, 130.2, 132.6, 133.5, 139.4, 143.8, 143.9, 147.6, 157.7, 159.0, 159.8; HRMS  $m/z$  calcd for  $C_{27}H_{27}NO_3Br$  492.1174 ( $MH^+$ ), found 492.1194.

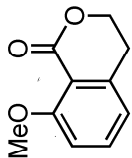

Current Data Parameters  
 NAME jh1-03-17-03  
 EXPNO 1  
 PROCNO 1

F2 - Acquisition Parameters  
 Date\_ 20030317  
 Time 10.20  
 INSTRUM spect  
 PROBHD 5 mm GNP 1H/1  
 PULPROG zg30  
 TD 46294  
 SOLVENT CDC13  
 NS 16  
 DS 2  
 SWH 6172.839 Hz  
 FIDRES 0.133340 Hz  
 AQ 3.7498641 sec  
 RG 2048  
 DW 81.000 usec  
 DE 6.00 usec  
 TE 300.0 K  
 D1 1.00000000 sec

\*\*\*\*\* CHANNEL f1 \*\*\*\*\*  
 NUC1 1H  
 P1 11.70 usec  
 PL1 0.00 dB  
 SF01 299.8718518 MHz

F2 - Processing parameters  
 SI 32768  
 SF 299.8700169 MHz  
 WDW no  
 SSB 0  
 LB 0.00 Hz  
 GB 0  
 PC 1.00

1D NMR plot parameters  
 CX 20.00 cm  
 F1P 8.000 ppm  
 F1 2398.96 Hz  
 F2P 0.000 ppm  
 F2 0.00 Hz  
 PPMCM 0.40000 ppm/cm  
 HZCM 119.94801 Hz/cm

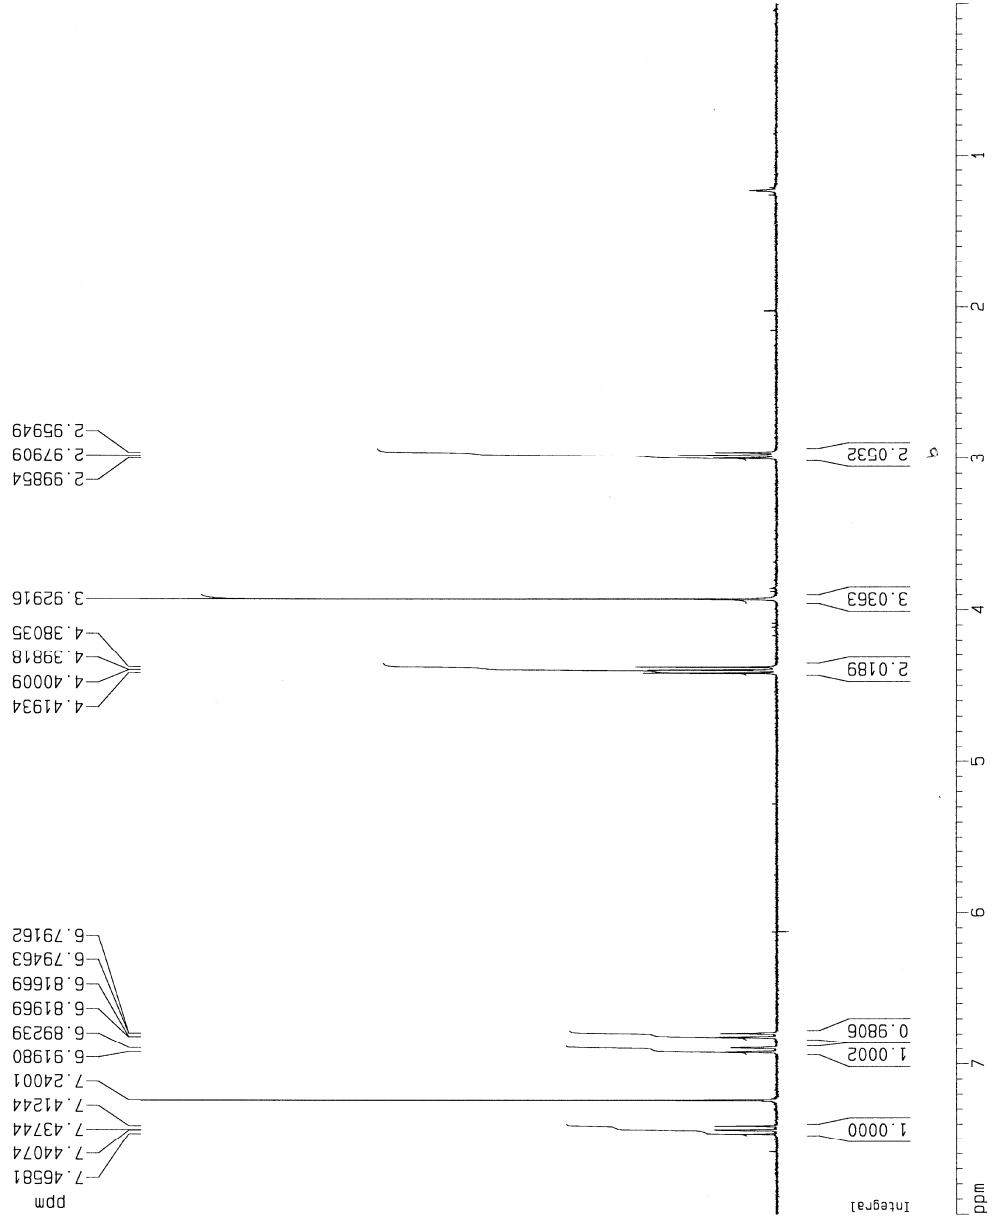

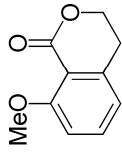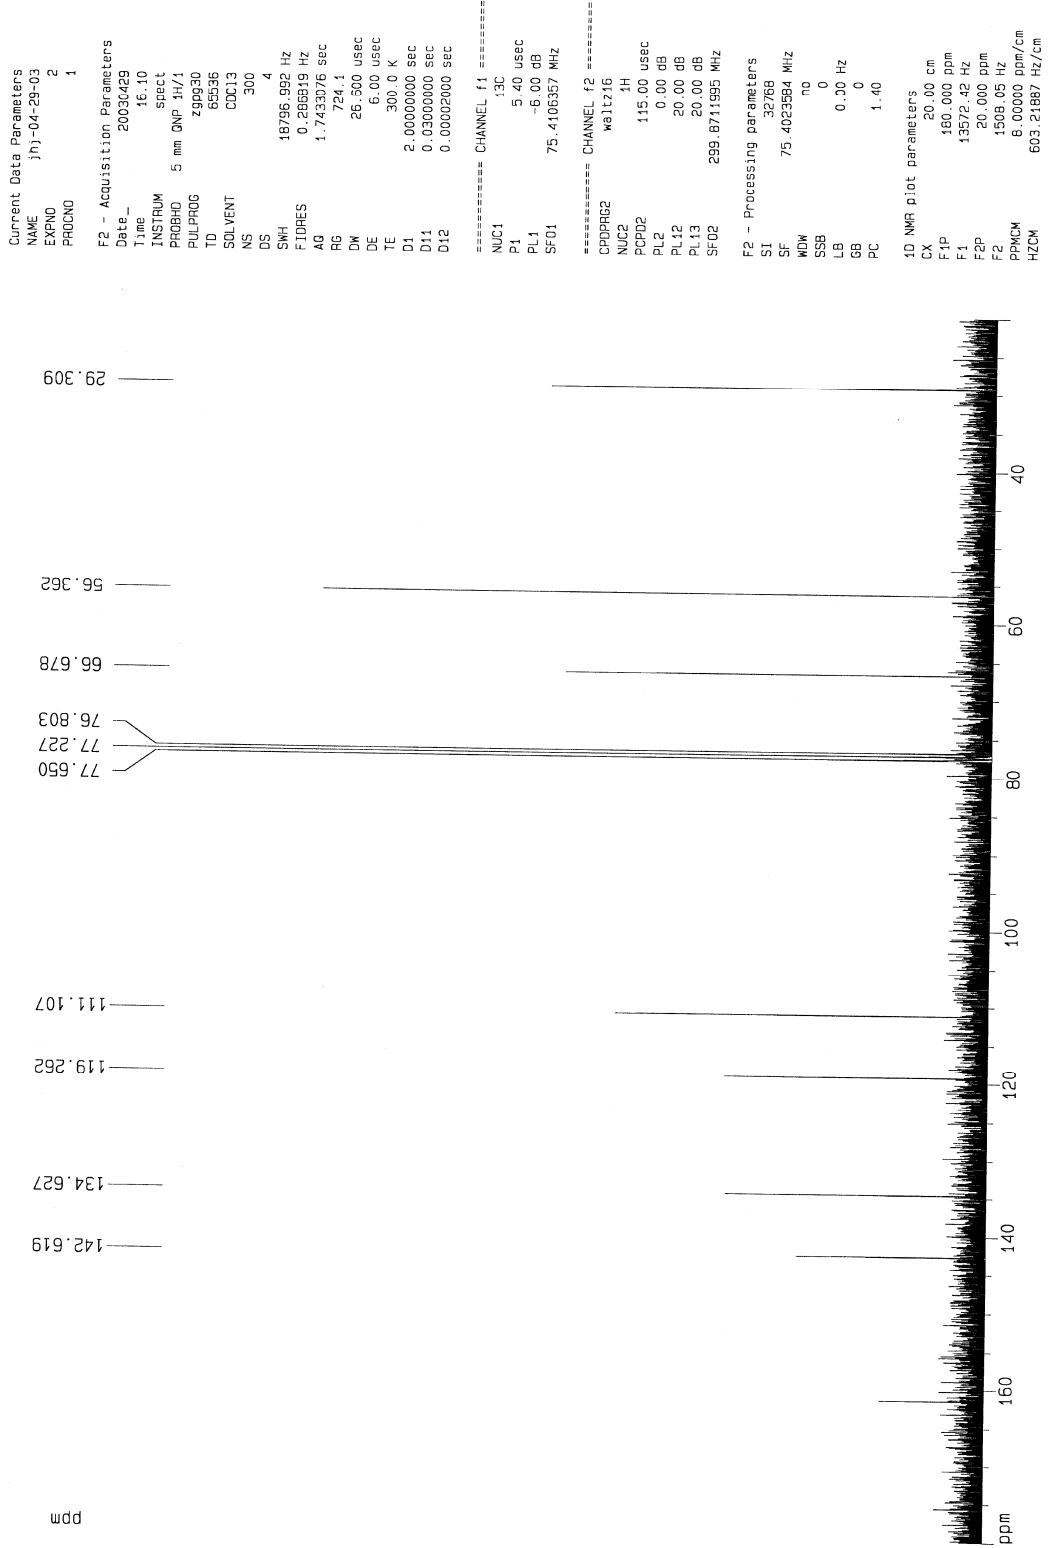

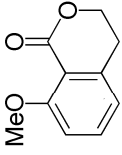

```

Current Data Parameters
NAME      JN1-04-29-03
EXPNO    3
PROCNO   1

F2 - Acquisition Parameters
Date_    20030429
Time     16:30
INSTRUM spect
PROBHD   5 mm QNP 1H/1
PULPROG zgpg30
TD        65536
SOLVENT  CDCl3
NS        93
DS        4
SWH       17985.611 Hz
FIDRES    0.274439 Hz
AQ        1.8219509 sec
RG         6384
DE        27.800 usec
TE         6.00 usec
TD1        300.0 K
D1         2.0000000 sec
D2         0.00357143 sec
D12        0.00002000 sec
DELTA     0.00006666 sec

===== CHANNEL f1 =====
NUC1      13C
P1         5.40 usec
P2         10.60 usec
PL1        -6.00 dB
SFO1      75.4058917 MHz

===== CHANNEL f2 =====
CPDPRG2   waltz16
NUC2       1H
P3         12.40 usec
P4         24.80 usec
PCPD2     115.00 usec
PL2        0.00 dB
PL12       20.00 dB
SFO2      299.0711995 MHz

F2 - Processing parameters
SI         32768
SF         75.4023584 MHz
WDW        no
SSB        0
LB         0.00 Hz
GB         0
PC         1.40

ID: NMR plot parameters
CX         20.00 cm
F1P        180.000 ppm
F1         13572.42 Hz
F2P        20.000 ppm
F2         1508.05 Hz
PPMCM      8.00000 ppm/cm
HZCM       603.21887 Hz/cm

```

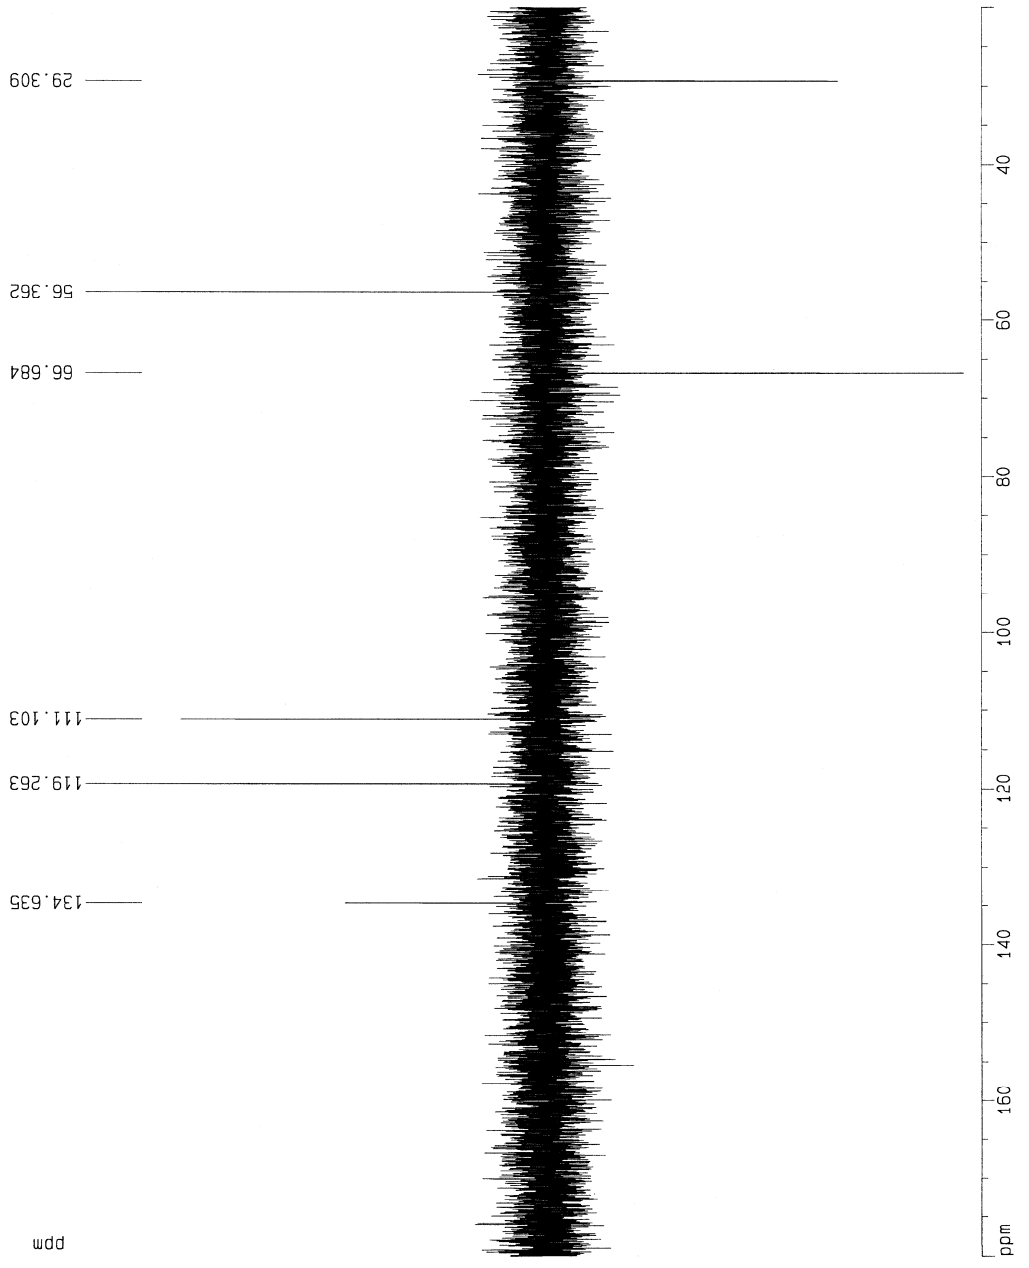

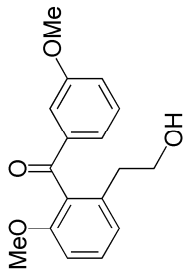

Current Data Parameters  
 NAME jhj-03-29-03  
 EXPNO 1  
 PROCNO 1

F2 - Acquisition Parameters  
 Date\_ 20030329  
 Time 15.43  
 INSTRUM spect  
 PROBHD 5 mm GNP 1H/1  
 PULPROG zg30  
 TD 46394  
 SOLVENT CDCl3  
 NS 16  
 DS 2  
 SWH 6172.839 Hz  
 FIDRES 0.133340 Hz  
 AQ 3.7498641 sec  
 RG 71.8  
 DW 81.000 usec  
 DE 6.00 usec  
 TE 300.0 K  
 D1 1.00000000 sec

===== CHANNEL f1 =====  
 NUC1 1H  
 P1 11.70 usec  
 PL1 0.00 dB  
 SF01 299.8718518 MHz

F2 - Processing parameters  
 SI 32766  
 SF 299.8700347 MHz  
 WDW nc  
 SSB 0  
 LB 0.00 Hz  
 GB 0  
 PC 1.00

1D NMR plot parameters  
 CX 20.00 cm  
 F1P 8.000 ppm  
 F1 2398.96 Hz  
 F2P 0.000 ppm  
 F2 0.00 Hz  
 PPKCM 0.40000 ppm/cm  
 HZCM 119.94801 Hz/cm

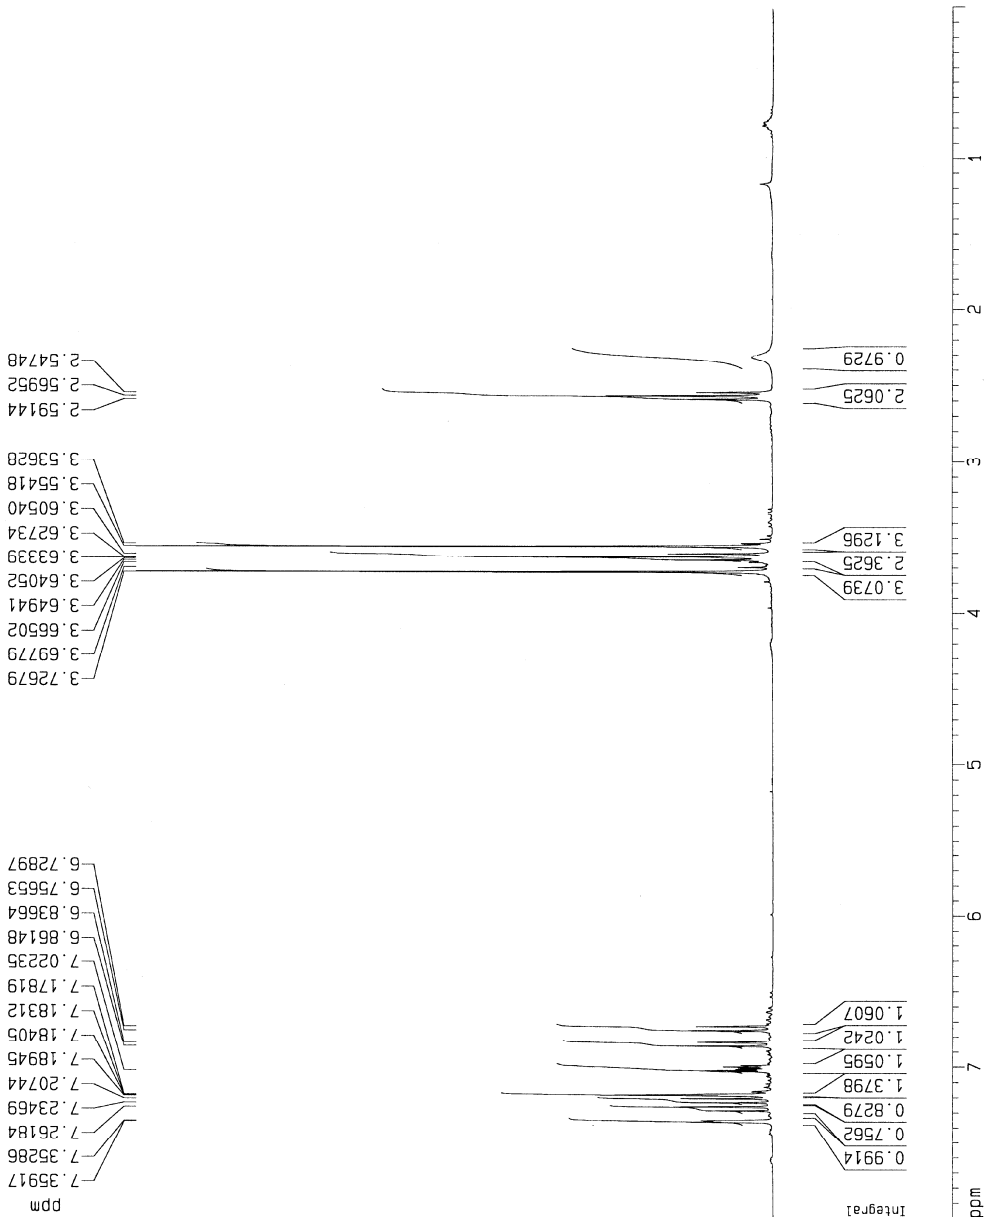

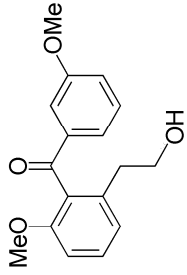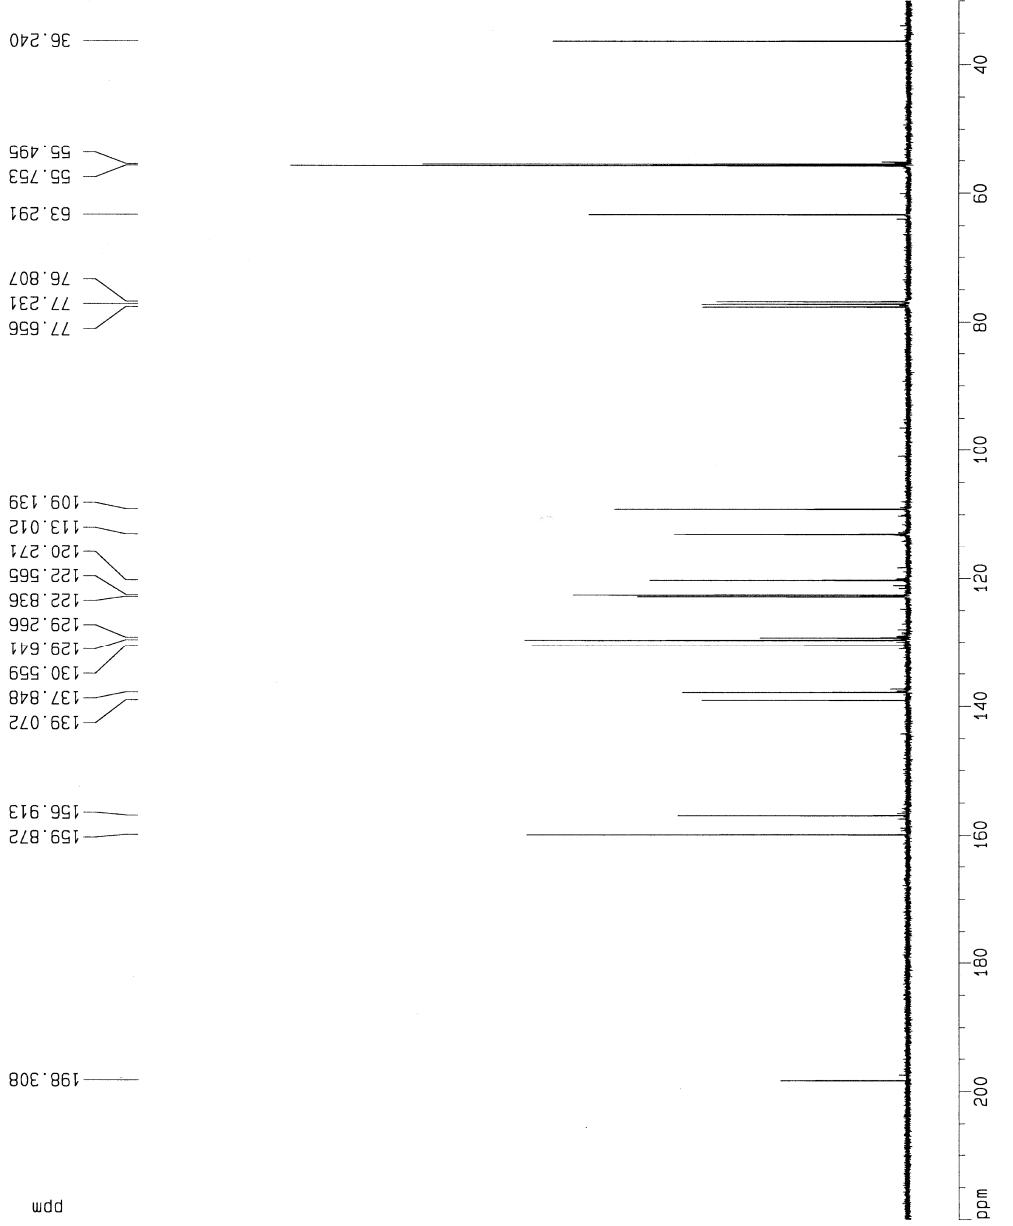

Current Data Parameters  
 NAME jh-03-29-03  
 EXPNO 2  
 PROCNO 1

F2 - Acquisition Parameters  
 Date\_ 20030329  
 Time 15.50  
 INSTRUM spect  
 PROBHD 5 mm QNP 1H/1  
 PULPROG zgpg30  
 TD 65536  
 SOLVENT CDCl3  
 NS 900  
 DS 4  
 SWH 16796.992 Hz  
 FIDRES 0.266819 Hz  
 AQ 1.7433076 sec  
 RG 1250.2  
 DM 26.600 usec  
 DE 6.00 usec  
 TE 300.0 K  
 D1 2.00000000 sec  
 D11 0.03000000 sec  
 D12 0.00002000 sec

===== CHANNEL f1 =====  
 NUC1 13C  
 P1 5.40 usec  
 PL1 -6.00 dB  
 SF01 75.410657 MHz

===== CHANNEL f2 =====  
 CPDPRG2 waltz16  
 NUC2 1H  
 PCPD2 115.00 usec  
 PL2 0.00 dB  
 PL12 20.00 dB  
 PL13 20.00 dB  
 SF02 299.8711995 MHz

F2 - Processing parameters  
 SI 32768  
 SF 75.4023670 MHz  
 WDM no  
 SSB 0  
 LB 0.00 Hz  
 GB 0  
 PC 1.40

1D NMR plot parameters  
 CX 20.00 cm  
 F1P 220.000 ppm  
 F1 16568.52 Hz  
 F2P 30.000 ppm  
 F2 2562.07 Hz  
 PPMCK 9.50000 ppm/cm  
 HZCK 716.56251 Hz/cm

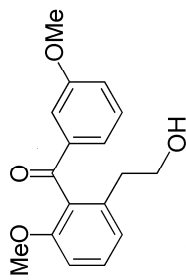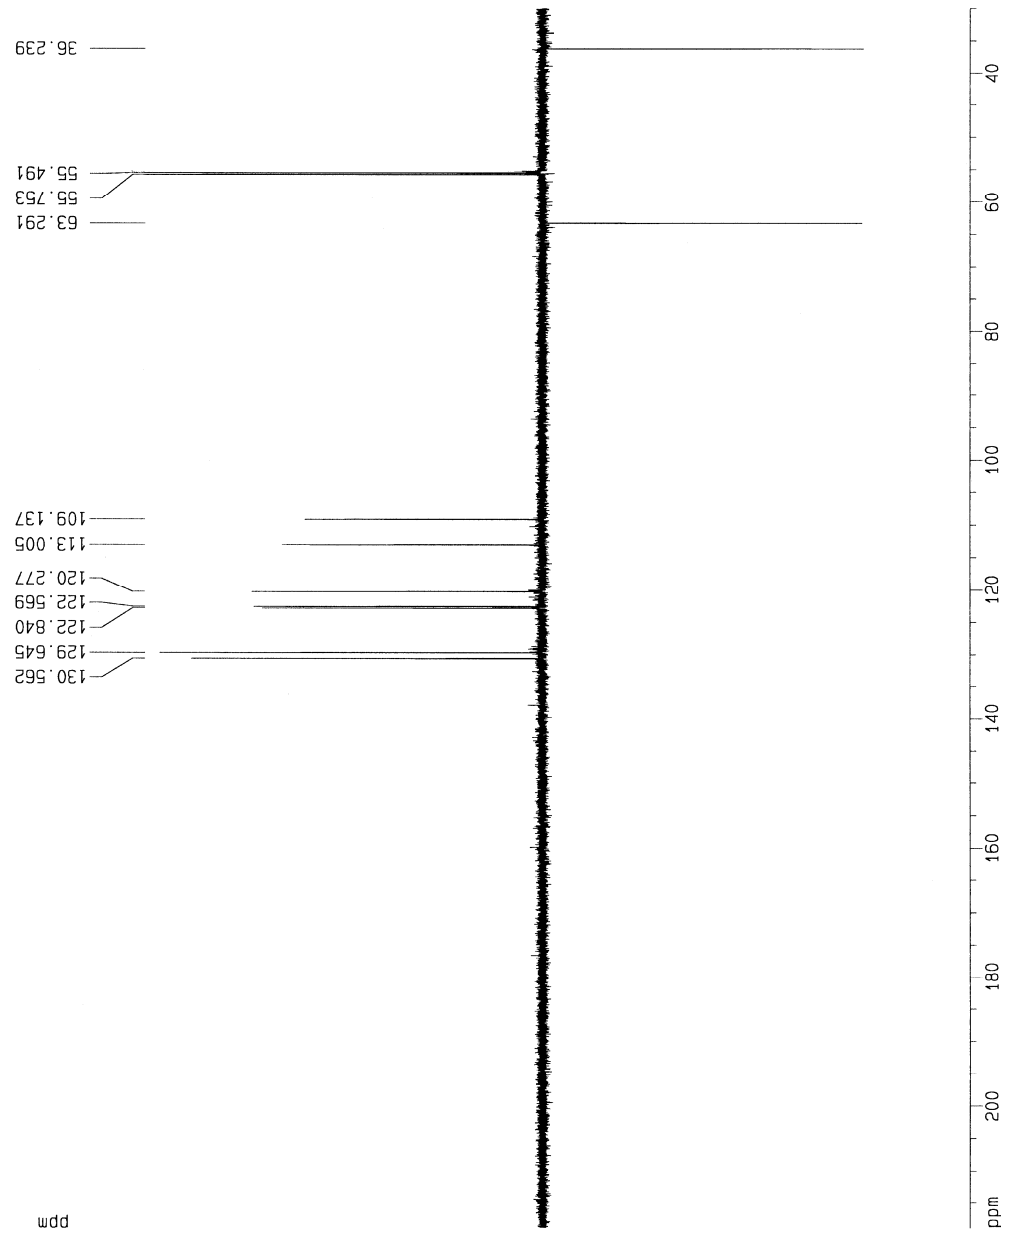

```

Current Data Parameters
NAME      J01-03-29-03
EXPNO    3
PROCNO   1

F2 - Acquisition Parameters
Date_    20030329
Time     16.51
INSTRUM spect
PROBHD   5 mm QNP 1H/1
PULPROG zgpg30
TD       65536
SOLVENT  CDCl3
NS       99
DS       4
SWH      17985.611 Hz
FIDRES   0.274439 Hz
AQ       1.8219508 sec
RG       16384
DM       27.800 usec
DE       6.00 usec
TE       300.0 K
D1       2.00000000 sec
D2       0.00357143 sec
D12      0.0002000 sec
DELTA    0.0000668 sec

===== CHANNEL f1 =====
NUC1      13C
P1        5.40 usec
PL1       -6.00 dB
SFO1      75.4098917 MHz

===== CHANNEL f2 =====
CPDPRG2  waltz16
NUC2      1H
P2        12.40 usec
PL2       0.00 dB
SFO2      299.871995 MHz

F2 - Processing parameters
SI        32768
SF        75.4023670 MHz
WDW       no
SSB       0
LB        0.00 Hz
GB        0
PC        1.40

ID: NMR plot parameters
CX        20.00 cm
F1P       220.000 ppm
F1        16586.52 Hz
F2P       30.000 ppm
F2        2662.07 Hz
PPHMC     9.50000 ppm/cm
HZCM      716.32251 Hz/cm
  
```



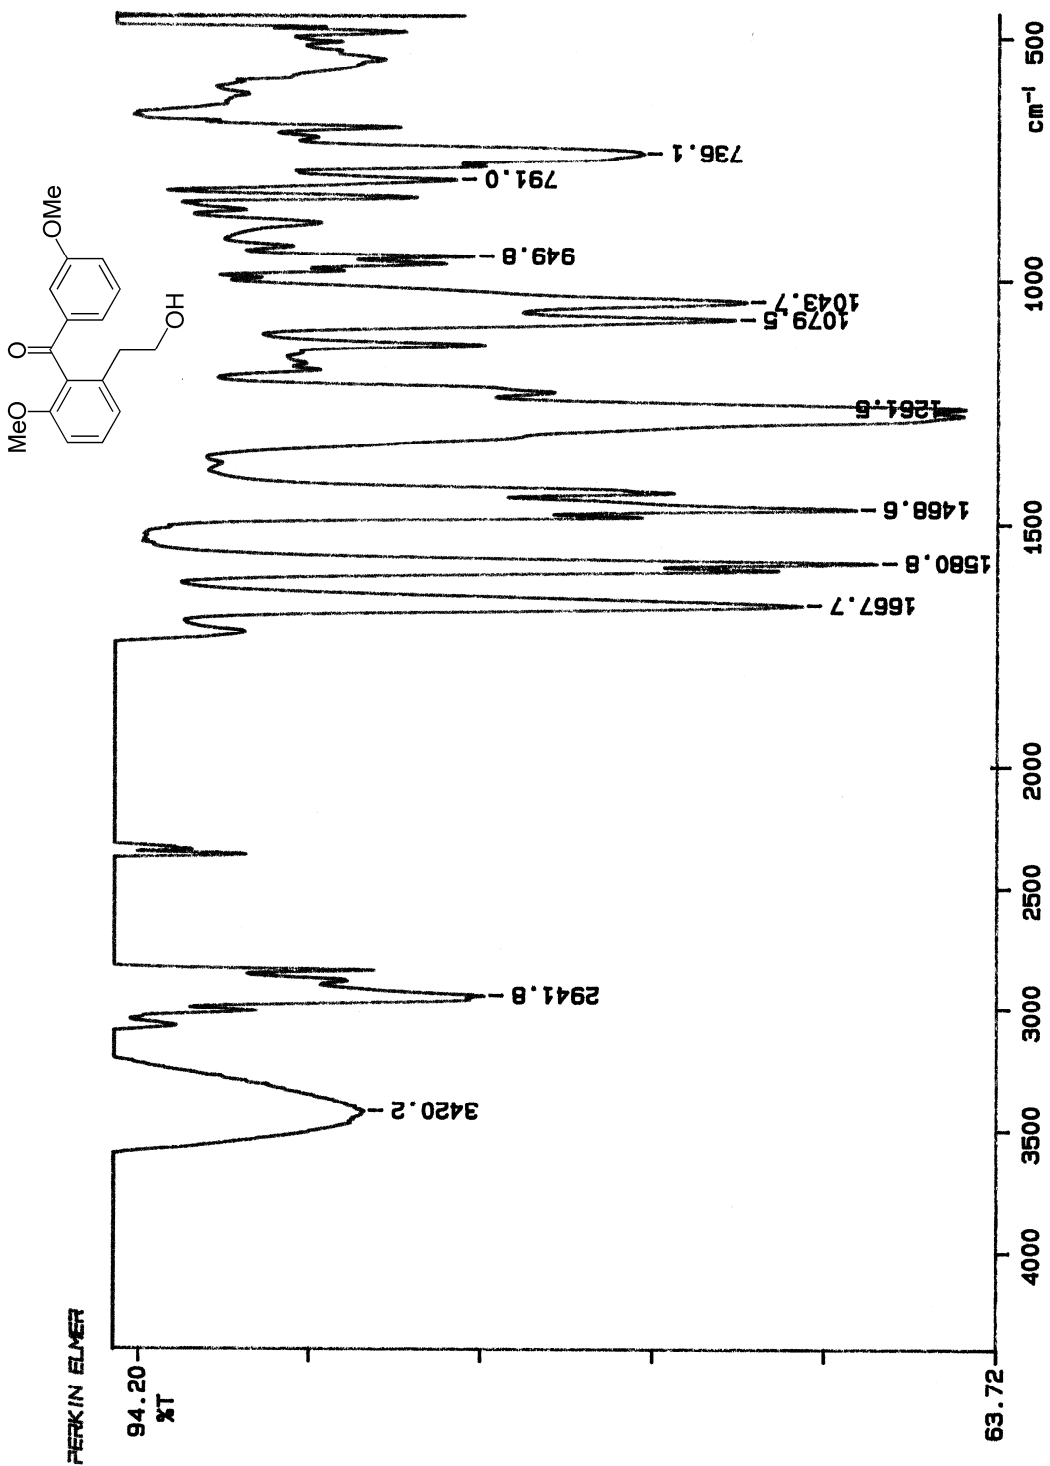

03/03/28 17:29  
X: 4 scans, 4.0cm-1

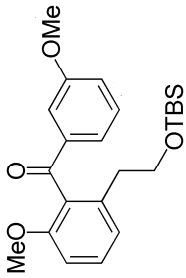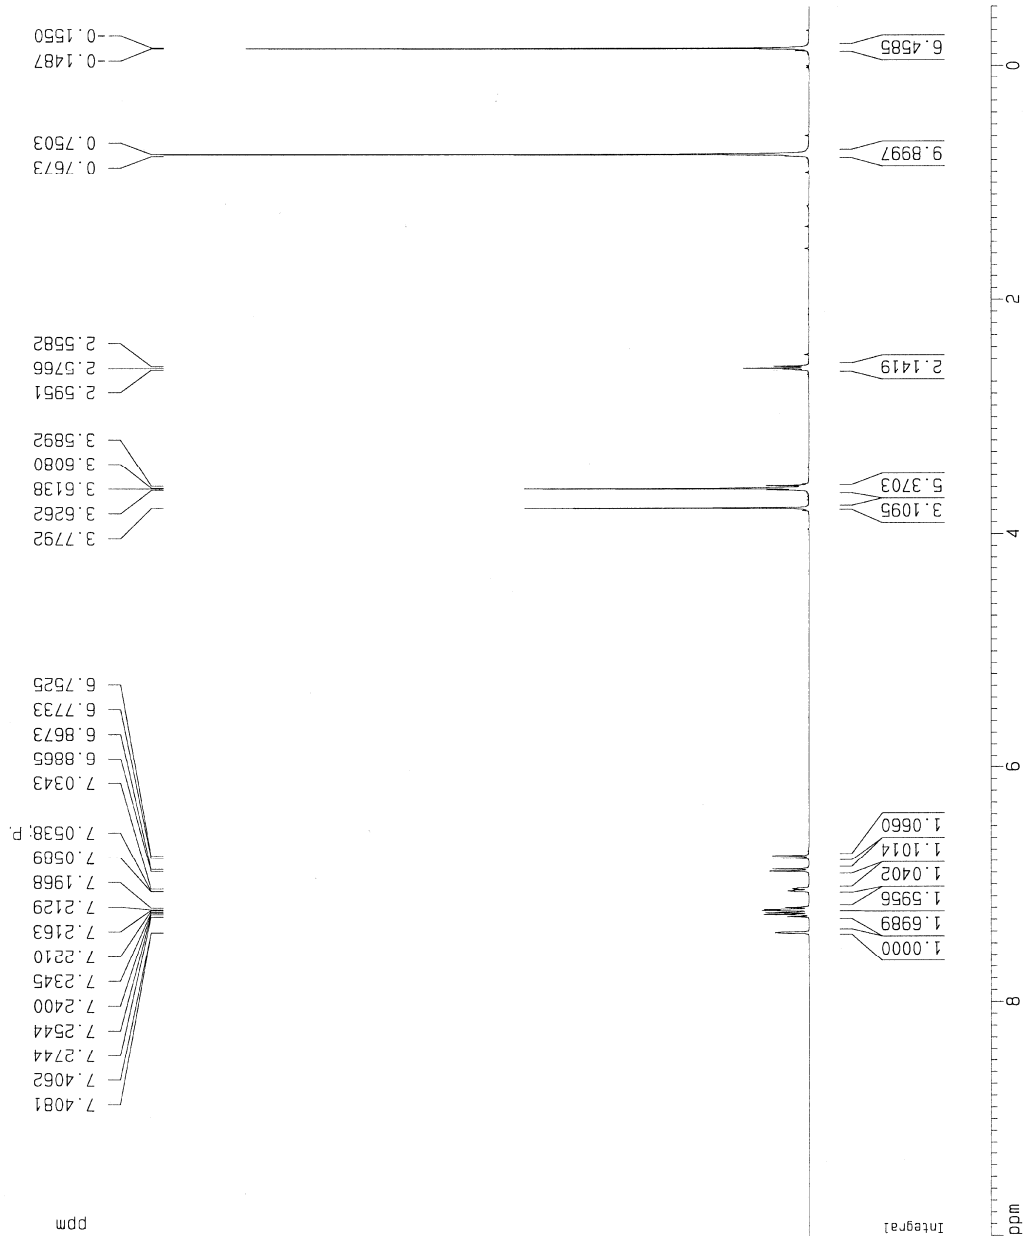

Current Data Parameters  
 NAME jh-12-14-04  
 EXPNO 4  
 PROCNO 1

F2 - Acquisition Parameters  
 Date\_ 2004/2/14  
 Time 15.48  
 INSTRUM spect  
 PROBH1 5 mm BBI 1H-B  
 PULPROG zg30  
 TD 49668  
 SOLVENT CDCl3  
 NS 10  
 DS 2  
 SWH 8278.146 Hz  
 FIDRES 0.166670 Hz  
 AQ 2.9999971 sec  
 RG 57  
 DW 60.400 usec  
 DE 6.00 usec  
 TE 300.0 K  
 D1 1.0000000 sec

===== CHANNEL f1 =====  
 NUC1 1H  
 P1 6.45 usec  
 PL1 0.00 dB  
 SFO1 400.1324710 MHz

F2 - Processing parameters  
 SI 32768  
 SF 400.1300346 MHz  
 WDW no  
 SSB 0  
 LB 0.00 Hz  
 GB 0  
 PC 1.00

1D NMR plot parameters  
 CX 20.00 cm  
 F1P 10 000 ppm  
 F1 4001.30 Hz  
 F2P -0 500 ppm  
 F2 -200 07 Hz  
 PPMCM 0.52500 ppm/cm  
 HZCM 210.08627 Hz/cm

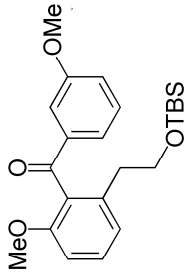

```

Current Data Parameters
NAME      jh1-05-12-03
EXPNO    6
PROCNO   1

F2 - Acquisition Parameters
Date_    20030512
Time     19.36
INSTRUM spect
PROBHD   5 mm QNP 1H/1
PULPROG zgpg30
TD        65536
SOLVENT  CCl3
NS         110
DS         4
SWH       18796.992 Hz
FIDRES    0.286819 Hz
AQ         1.7433076 sec
RG         512
DM         26.600 usec
DE         6.00 usec
TE         300.0 K
D1         2.00000000 sec
D11        0.03000000 sec
D12        0.00002000 sec

===== CHANNEL f1 =====
NUC1       13C
P1         5.40 usec
PL1        -6.00 dB
SF01       75.4106357 MHz

===== CHANNEL f2 =====
CPDPRG2   waltz16
NUC2       1H
PCPD2     115.00 usec
PL2        0.00 dB
PL12       20.00 dB
PL13       20.00 dB
SF02       299.8711995 MHz

F2 - Processing parameters
SI         32768
SF         75.4023653 MHz
RG         no
WDW         0
SSB         0
LB         0.00 Hz
GB         0
PC         1.40

1D NMR plot parameters
CX         20.00 cm
F1P        210.000 ppm
F1         15834.50 Hz
F2P        -10.000 ppm
F2         -754.02 Hz
PPMCM      11.00000 ppm/cm
HZCM       829.42603 Hz/cm

```

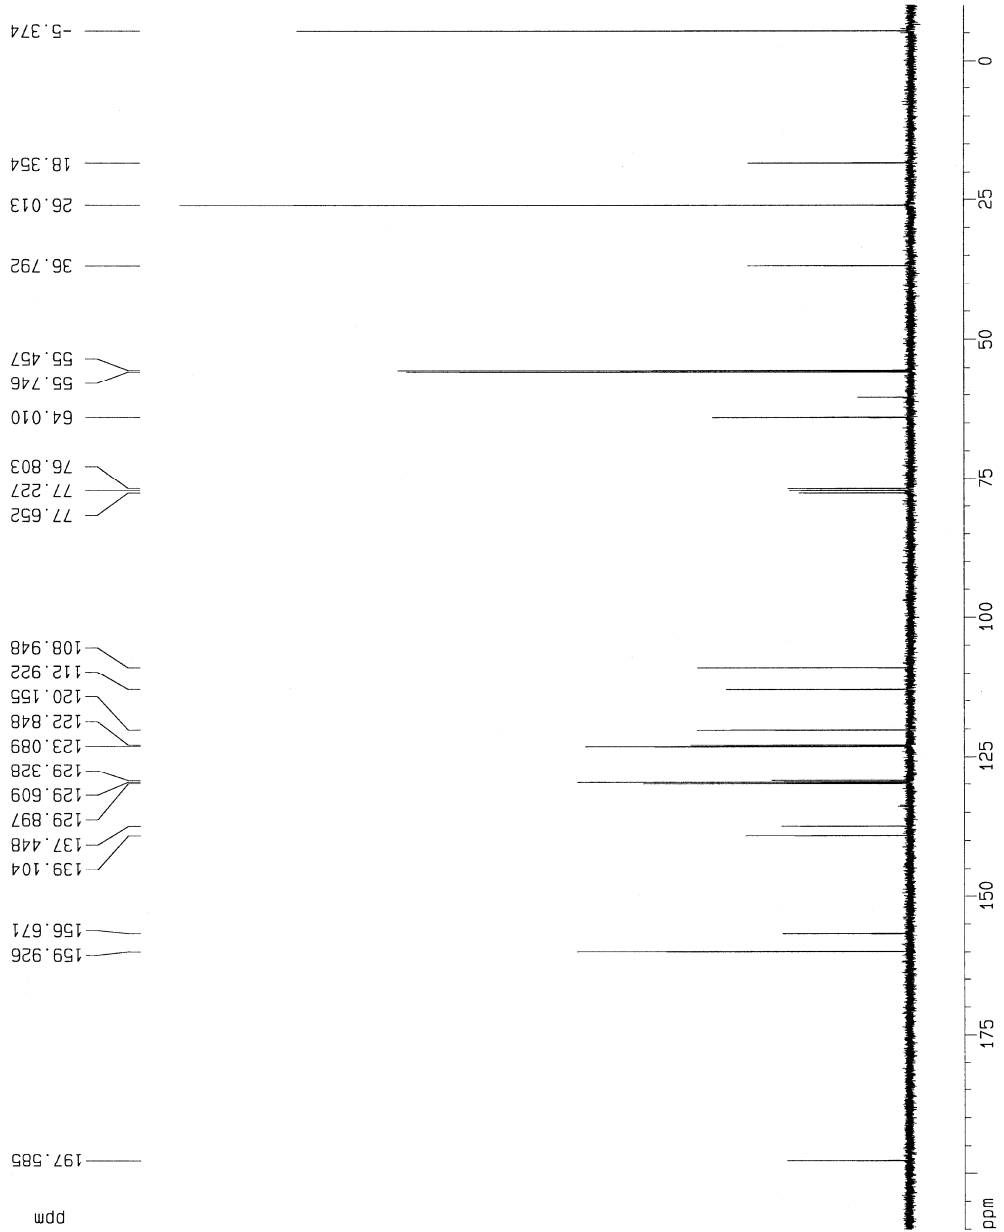

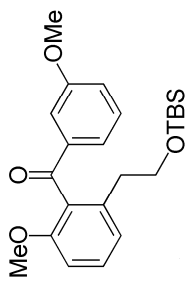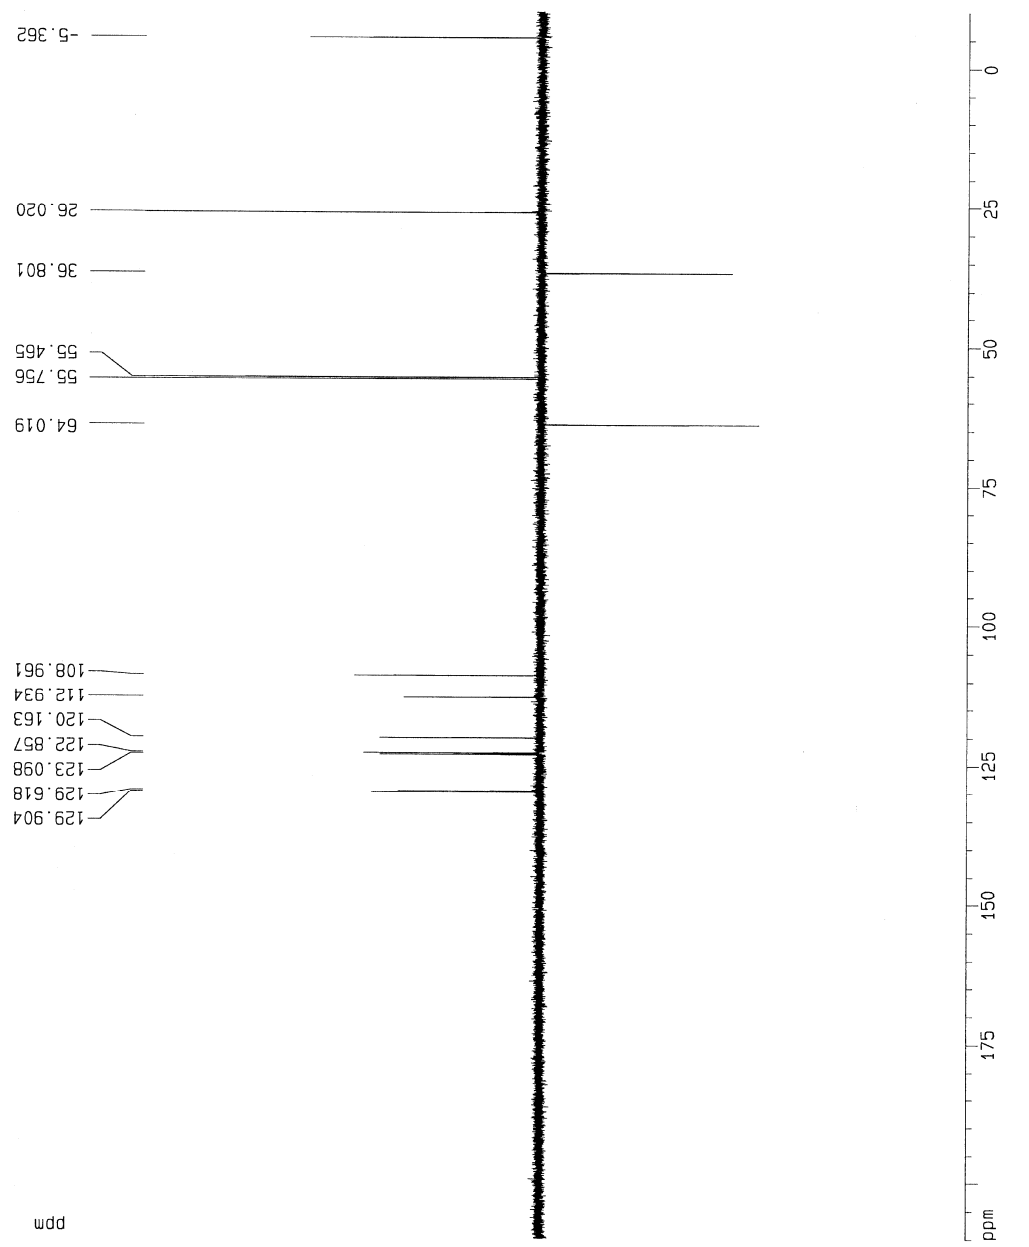

Current Data Parameters  
 NAME jh1-05-12-03  
 EXPNO 7  
 PROCNO 1

F2 - Acquisition Parameters  
 Date\_ 20030512  
 Time 19.39  
 INSTRUM spect  
 PROBHD 5 mm QNP 1H/1  
 PULPROG zgpg30  
 TD 65536  
 SOLVENT CDCl3  
 NS 20  
 DS 4  
 SWH 17965.611 Hz  
 FIDRES 0.274439 Hz  
 AQ 1.6219506 sec  
 RG 16384  
 DW 27.800 usec  
 DE 6.00 usec  
 TE 300.0 K  
 D1 2.0000000 sec  
 D2 0.00357143 sec  
 D12 0.0000200 sec  
 DELTA 0.10000666 sec

===== CHANNEL f1 =====  
 NUC1 13C  
 P1 5.40 usec  
 PL1 -6.00 dB  
 SFO1 75.408817 MHz

===== CHANNEL f2 =====  
 CPDPRG2 waltz16  
 NUC2 1H  
 P3 12.40 usec  
 PL3 24.00 usec  
 PCPD2 115.00 usec  
 PL2 0.00 dB  
 PL12 20.00 dB  
 SFO2 299.871995 MHz

F2 - Processing parameters  
 SI 32768  
 SF 75.4023645 MHz  
 MDW no  
 SSB 0  
 LB 0.00 Hz  
 GB 0  
 PC 1.40

ID NMR plot parameters  
 CX 20.00 cm  
 F1P 210.000 ppm  
 F1 15834.50 Hz  
 F2P -10.000 ppm  
 F2 -754.02 Hz  
 PPMCM 11.00000 ppm/cm  
 HZCM 825.46603 Hz/cm

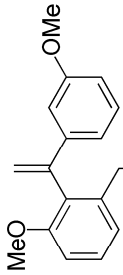

Current Data Parameters  
 NAME jh1-12-14-04  
 EXPNO 1  
 PROCNO 1

F2 - Acquisition Parameters  
 Date\_ 20041214  
 Time 15.33  
 INSTRUM spect  
 PROBHD 5 mm BBI 4H-B  
 PULPROG zg30  
 TD 48668  
 SOLVENT CDCl3  
 NS 16  
 DS 2  
 SWH 8278.146 Hz  
 FIDRES 0.166670 Hz  
 AQ 2.9999971 sec  
 RG 57  
 DW 60.400 usec  
 DE 6.00 usec  
 TE 300.0 K  
 D1 1.00000000 sec

===== CHANNEL f1 =====  
 NUC1 1H  
 P1 6.45 usec  
 PL1 0.00 dB  
 SFO1 400.1324710 MHz

F2 - Processing parameters  
 SI 32768  
 SF 400.1299874 MHz  
 WDW nc  
 SSB 0  
 LB 0.00 Hz  
 GB 0  
 PC 1.00

1D NMR plot parameters  
 CX 20.00 cm  
 F1P 10.000 ppm  
 F1 4001.30 Hz  
 F2P -200.07 ppm  
 F2 0.52500 ppm/cm  
 PPMCM 210.06825 Hz/cm

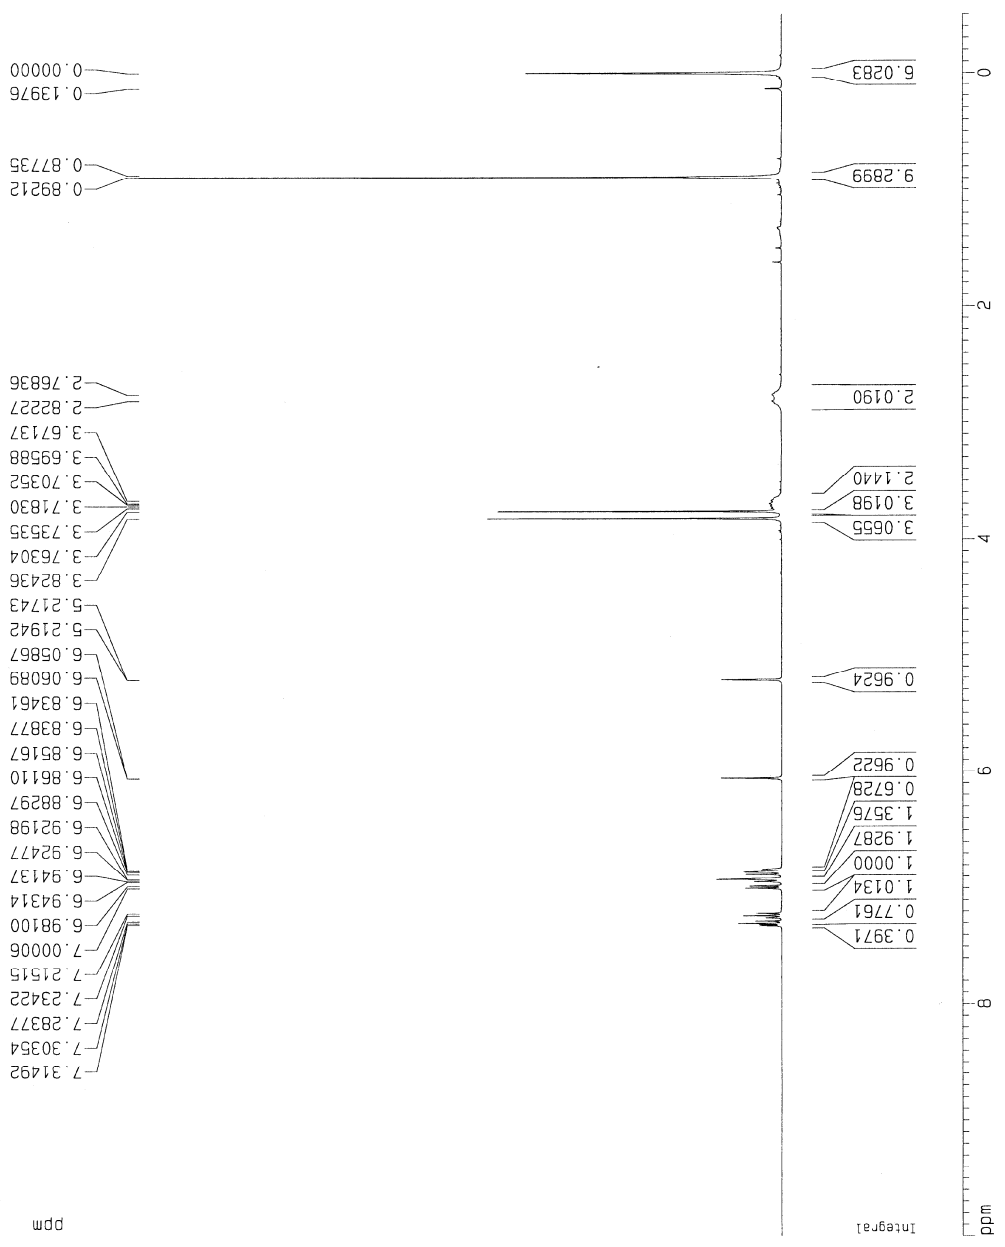

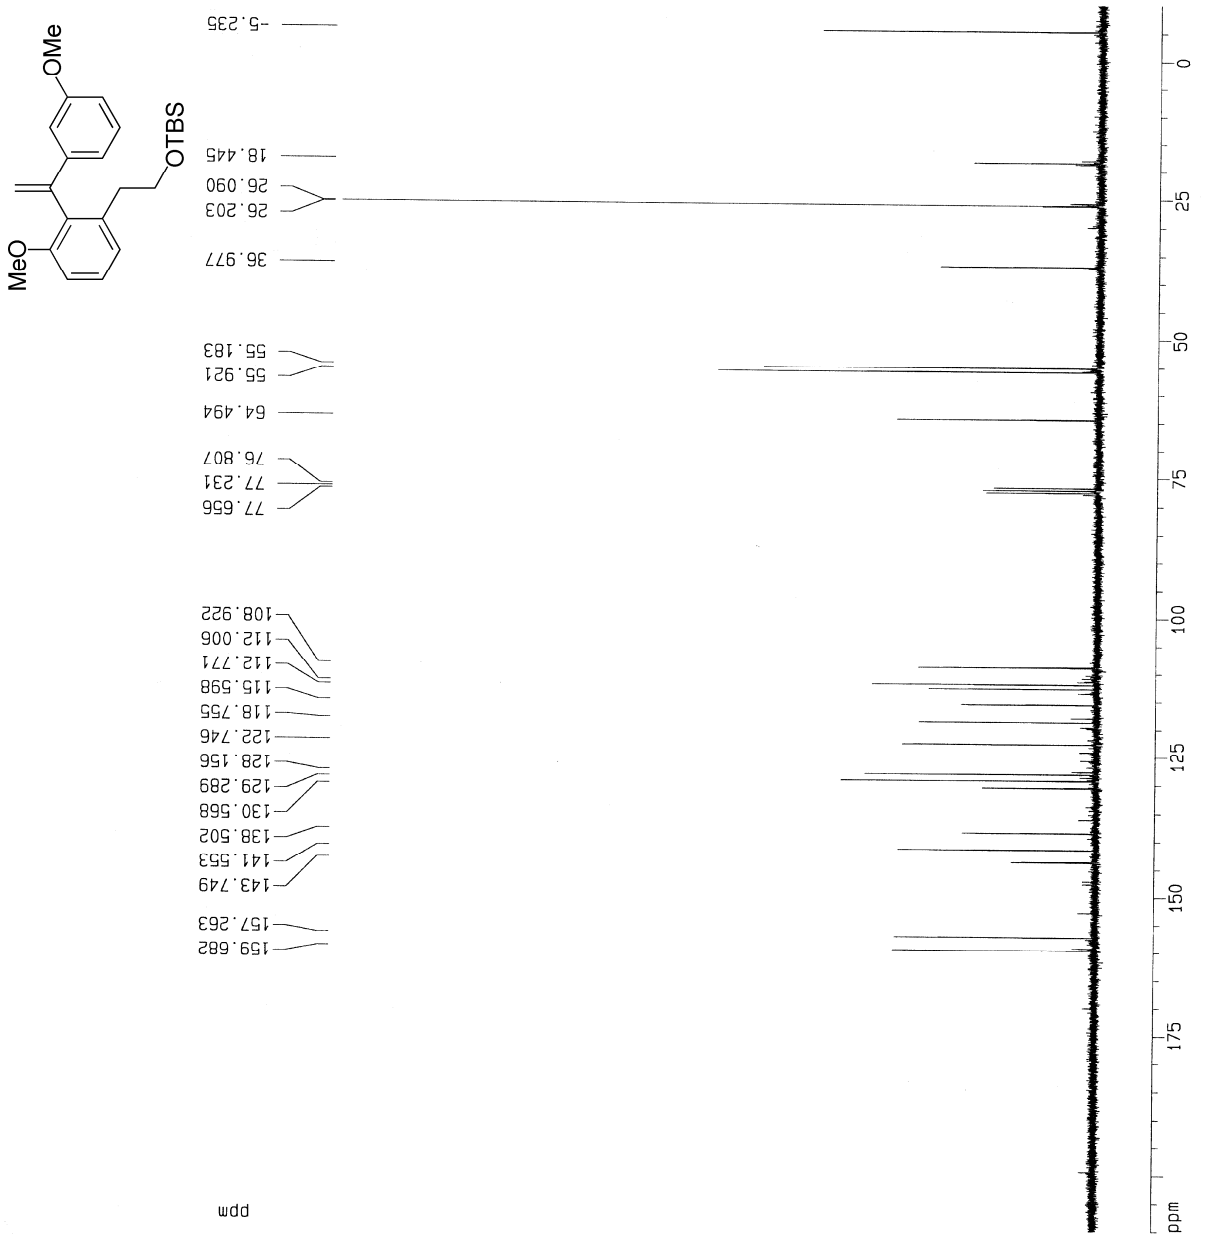

Current Data Parameters  
 NAME jhl-05-25-03  
 EXPNO 2  
 PROCNO 1

F2 - Acquisition Parameters  
 Date\_ 20030325  
 Time 20.19  
 INSTRUM spect  
 PROBHD 5 mm QNP 1H/1  
 PULPROG zgpg30  
 TD 65536  
 SOLVENT CDCl3  
 NS 100  
 DS 4  
 SWH 18796.992 Hz  
 FIDRES 0.266813 Hz  
 AQ 1.7433078 sec  
 RG 4096  
 DW 26.600 usec  
 DE 6.00 usec  
 TE 300.0 K  
 D1 2.0000000 sec  
 D11 0.0300000 sec  
 D12 0.0000200 sec

===== CHANNEL f1 =====  
 NUC1 13C  
 P1 5.40 usec  
 PL1 -6.00 dB  
 SF01 75.4106357 MHz

===== CHANNEL f2 =====  
 CPDPRG2 waltz16  
 NUC2 1H  
 P2 115.00 usec  
 PL2 0.00 dB  
 PL12 20.00 dB  
 PL13 20.00 dB  
 SF02 299.8711995 MHz

F2 - Processing parameters  
 SI 32768  
 SF 75.4023697 MHz  
 MDW no  
 SSB 0  
 LB 0.00 Hz  
 GB 0  
 PC 1.40

1D NMR plot parameters  
 CX 20.00 cm  
 F1P 210.000 ppm  
 F1 45834.50 Hz  
 F2P -10.000 ppm  
 F2 -754.02 Hz  
 PPMCK 11.00000 ppm/cm  
 HZCM 889.42603 Hz/cm

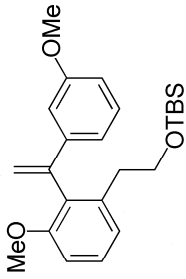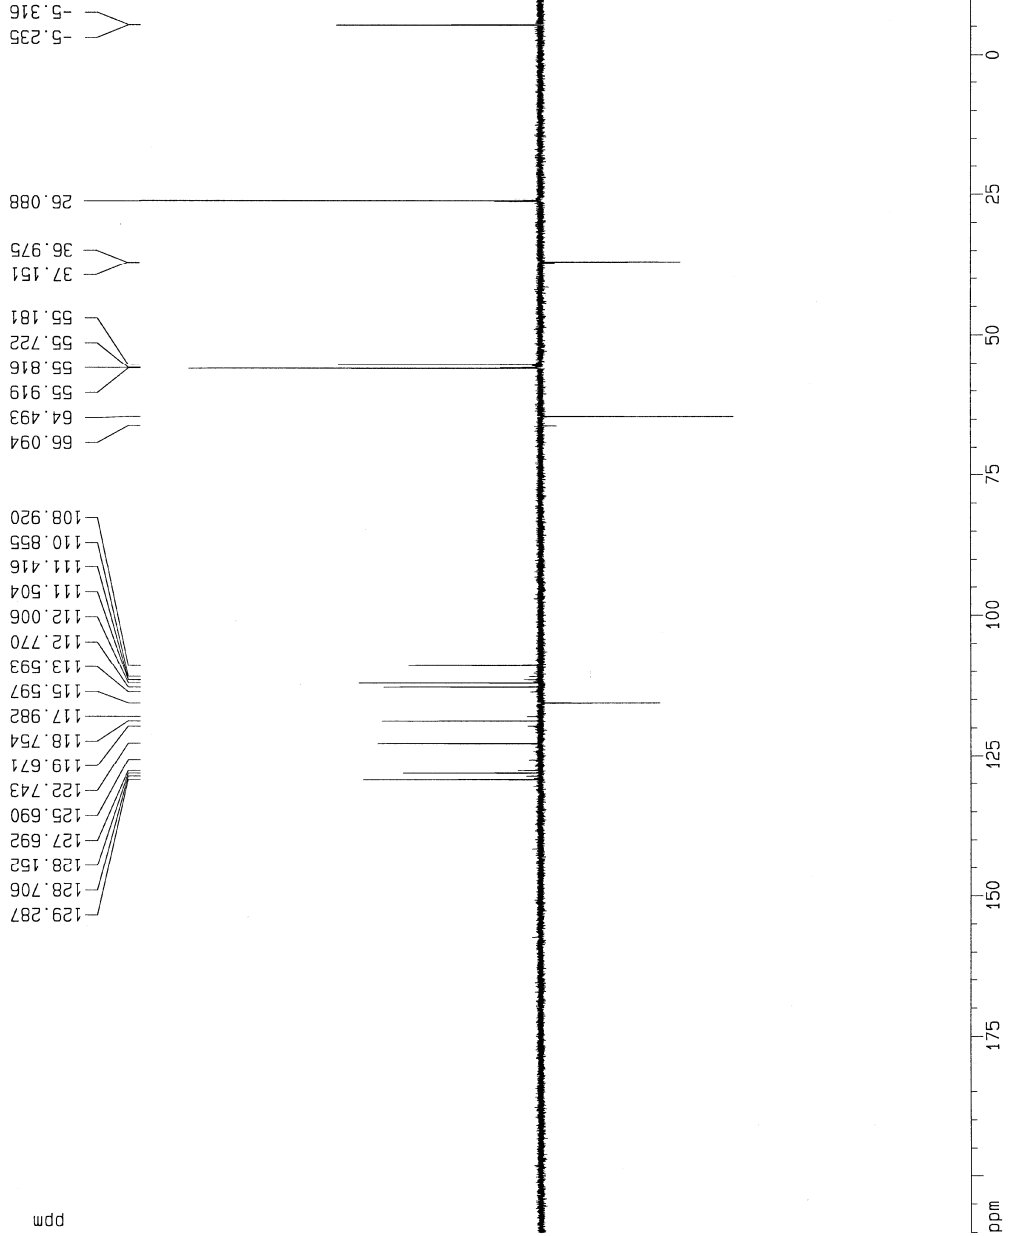

Current Data Parameters  
 NAME jh-05-25-03  
 EXPNO 3  
 PROCNO 1

F2 - Acquisition Parameters  
 Date\_ 20030525  
 Time 20.24  
 INSTRUM spect  
 PROBHD 5 mm QNP 1H/1  
 PULPROG zgpg30  
 TD 65536  
 SOLVENT CDCl3  
 NS 50  
 DS 4  
 SWH 17985.611 Hz  
 FIDRES 0.274438 Hz  
 Ad 1.6219508 sec  
 RG 16384  
 DM 27.800 usec  
 DE 6.00 usec  
 TE 300.0 K  
 D1 2.0000000 sec  
 D2 0.00357143 sec  
 D12 0.0002000 sec  
 DELTA 0.00000688 sec

===== CHANNEL f1 =====  
 NUC1 13C  
 P1 5.40 usec  
 F2 10.80 usec  
 PL1 -6.00 dB  
 SFO1 75.4098817 MHz

===== CHANNEL f2 =====  
 CPDPRG2 waltz16  
 NUC2 1H  
 P3 12.40 usec  
 P4 24.80 usec  
 PCPD2 115.00 usec  
 PL2 0.00 dB  
 PL12 20.00 dB  
 SFO2 299.6711995 MHz

F2 - Processing parameters  
 S1 32768  
 SF 75.4023688 MHz  
 MDW no  
 SSB 0  
 LB 0.00 Hz  
 GB 0  
 PC 1.40

1D NMR plot parameters  
 CX 20.00 cm  
 F1P 210.000 ppm  
 F1 15834.50 Hz  
 F2P -10.000 ppm  
 F2 -754.02 Hz  
 PPMCM 11.00000 ppm/cm  
 HZCM 889.42603 Hz/cm

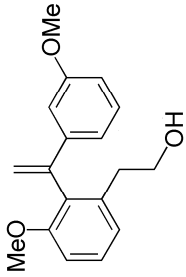

Current Data Parameters  
 NAME jhj-05-27-03  
 EXPNO 2  
 PROCNO 1

F2 - Acquisition Parameters  
 Date\_ 20030527  
 Time 14.40  
 INSTRUM spct  
 PROBHD 5 mm Multinu  
 PULPROG zg30  
 TD 46294  
 SOLVENT CDCl3  
 NS 16  
 DS 2  
 SWH 6172.839 Hz  
 FIDRES 0.133340 Hz  
 AQ 3.7498541 sec  
 RG 128  
 DW 81.000 usec  
 DE 6.00 usec  
 TE 302.0 K  
 D1 1.00000000 sec

\*\*\*\*\* CHANNEL f1 \*\*\*\*\*  
 NUC1 1H  
 P1 9.60 usec  
 PL1 -6.00 dB  
 SF01 300.1318534 MHz

F2 - Processing parameters  
 SI 32768  
 SF 300.1300000 MHz  
 WDW no  
 SSB 0  
 LB 0.00 Hz  
 GB 0  
 PC 1.00

1D NMR plot parameters  
 CX 20.00 cm  
 F1P 8.000 ppm  
 F1 2401.04 Hz  
 F2P -0.500 ppm  
 F2 -150.07 Hz  
 PPMCM 0.42500 ppm/cm  
 HZCM 127.55525 Hz/cm

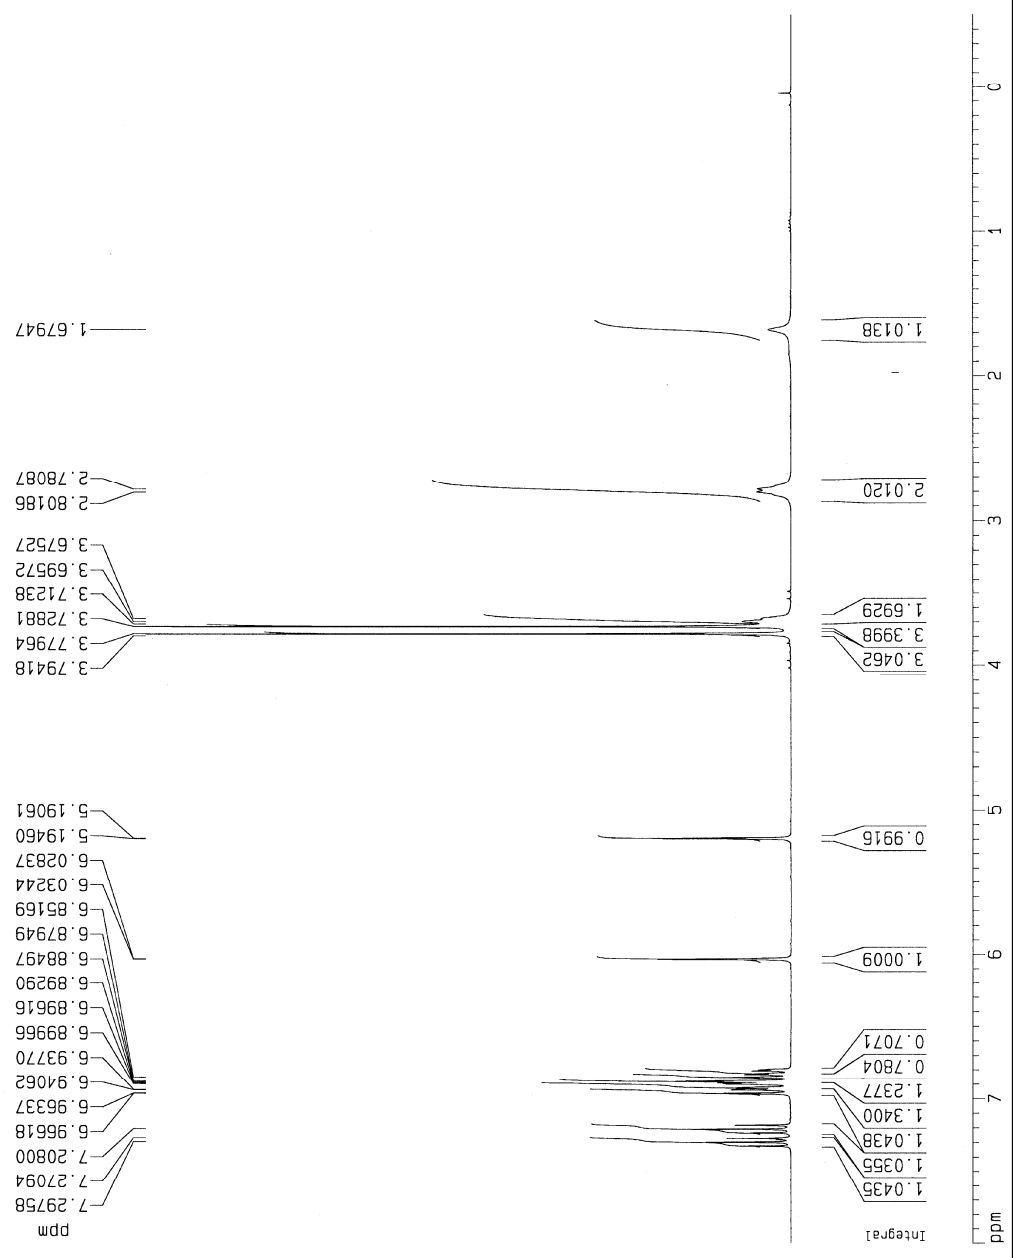



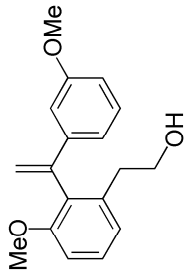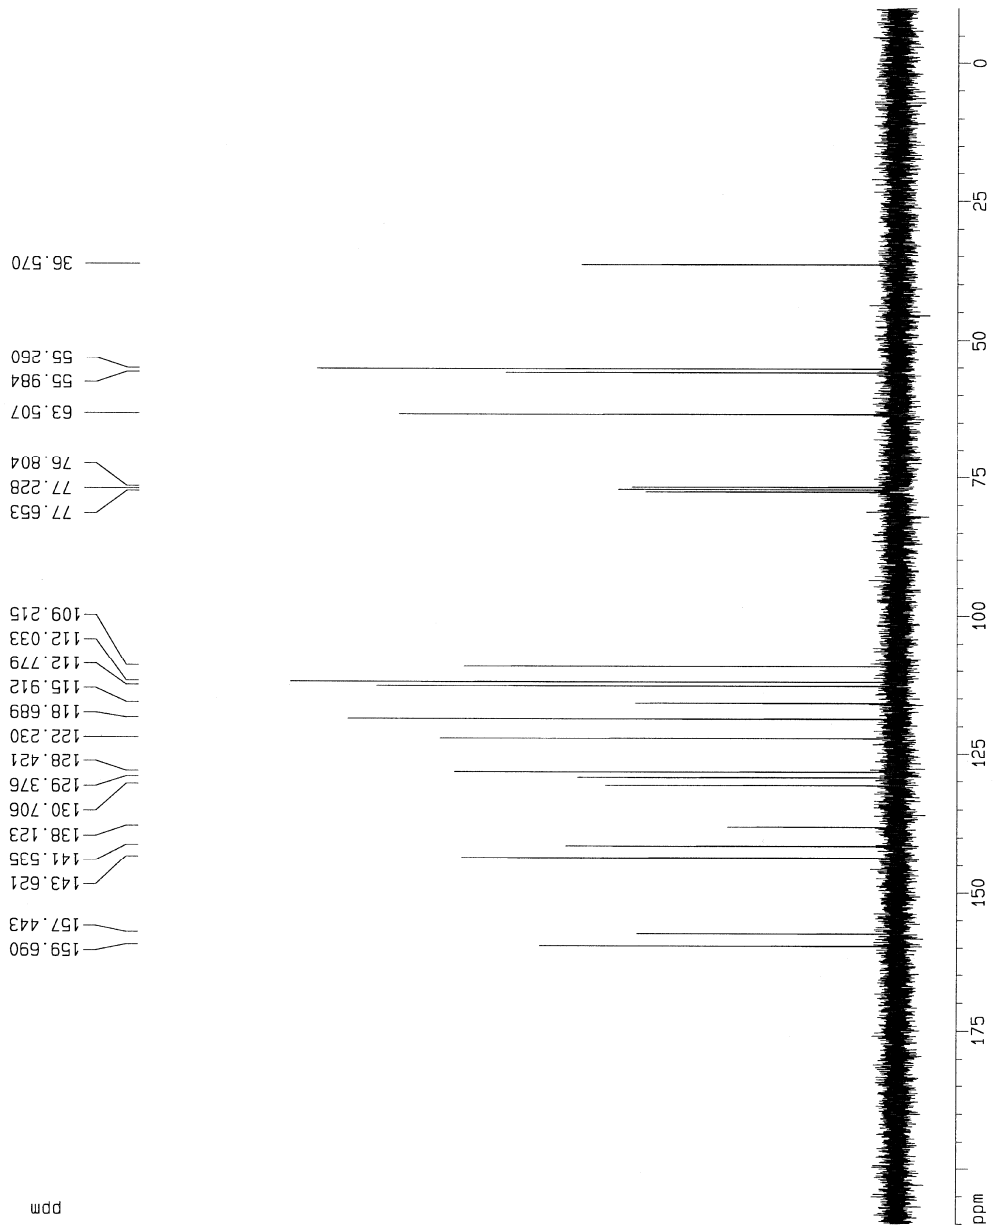

Current Data Parameters  
 NAME jh-05-27-03  
 EXPNO 3  
 PROCNO 1

F2 - Acquisition Parameters  
 Date\_ 20030527  
 Time 14.46  
 INSTRUM spect  
 PROBHD 5 mm Multinu  
 PULPROG zgpg30  
 TD 65536  
 SOLVENT CDCl3  
 NS 100  
 DS 2  
 SWH 18832.353 Hz  
 FIDRES 0.287360 Hz  
 AQ 1.7400308 sec  
 RG 13004  
 DM 26.550 usec  
 DE 6.00 usec  
 TE 300.0 K  
 D1 2.00000000 sec  
 d11 0.03000000 sec  
 d12 0.00002000 sec

==== CHANNEL f1 =====  
 NUC1 13C  
 P1 5.60 usec  
 PL1 -6.00 dB  
 SF01 75.4760200 MHz

==== CHANNEL f2 =====  
 CPDPRG2 waltz16  
 NUC2 1H  
 PCPD2 114.00 usec  
 PL2 -6.00 dB  
 PL12 18.00 dB  
 PL13 18.00 dB  
 SF02 300.1312005 MHz

F2 - Processing parameters  
 SI 32768  
 SF 75.4677421 MHz  
 WDW no  
 SSB 0  
 LB 0.00 Hz  
 GB 0  
 PC 1.40

1D NMR plot parameters  
 CX 20.00 cm  
 F1P 210.000 ppm  
 F1 15646.23 Hz  
 F2P -10.000 ppm  
 F2 -754.68 Hz  
 PPMCM 11.00000 ppm/cm  
 HZCM 830.14514 Hz/cm

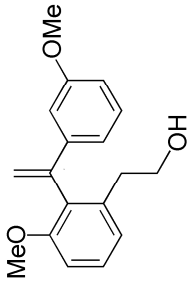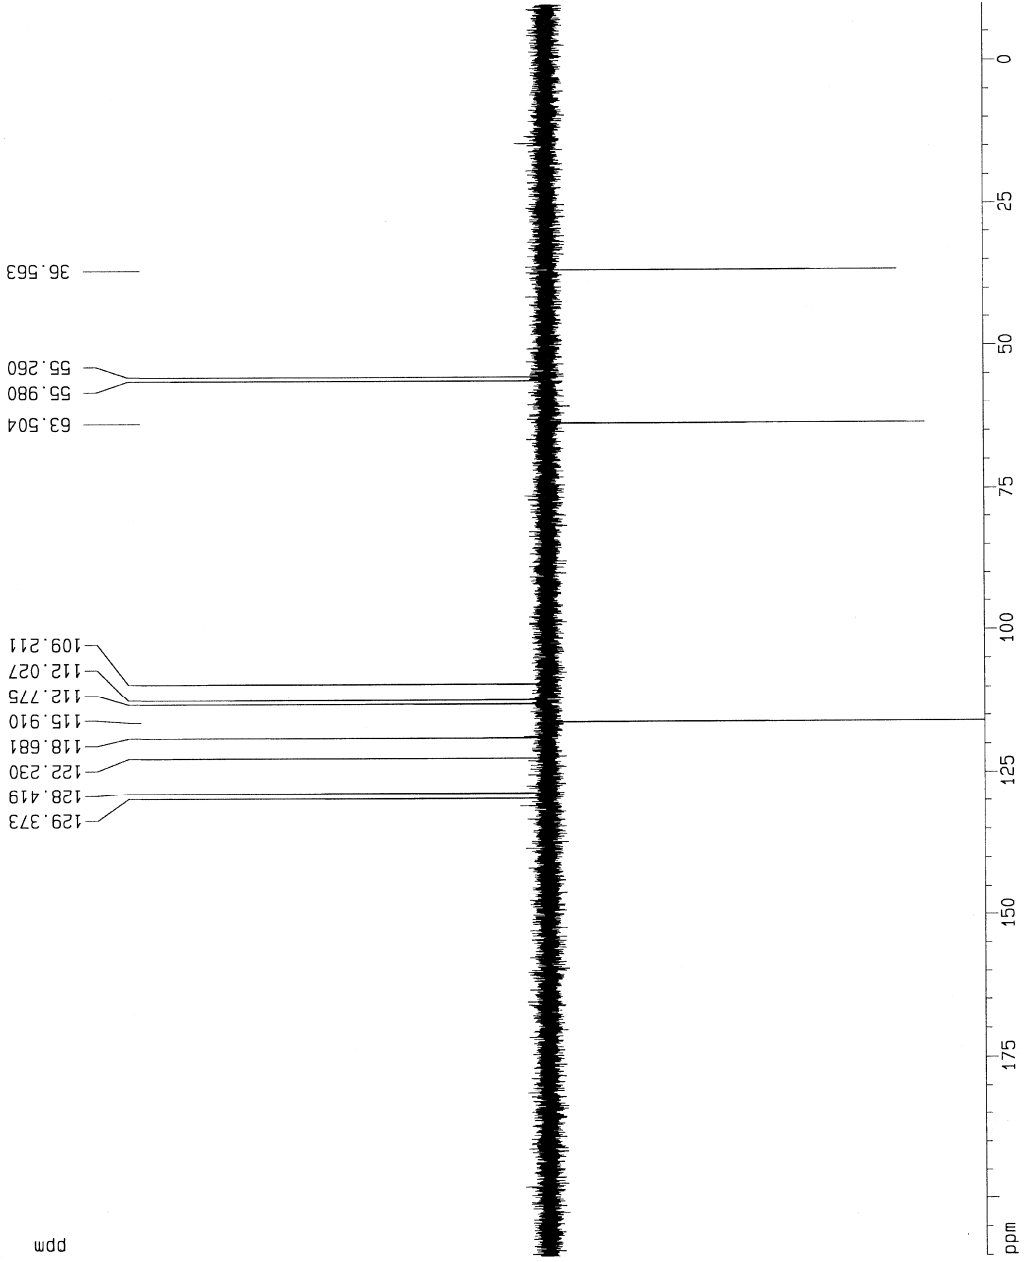

Current Data Parameters  
 NAME jh1-05-27-03  
 EXPNO 4  
 PROCNO 1

F2 - Acquisition Parameters  
 Date\_ 20030527  
 Time 14.50  
 INSTRUM spect  
 PROBRD 5 mm Multinou  
 PULPROG dept135  
 TD 65536  
 SOLVENT CDCl3  
 NS 50  
 DS 4  
 SWH 17965.611 Hz  
 FIDRES 0.274439 Hz  
 AQ 1.8219508 sec  
 RG 16384  
 DM 27.800 usec  
 DE 6.00 usec  
 TE 300.0 K  
 CACT2 145.0030000  
 D1 2.0030000 sec  
 d2 0.00344828 sec  
 d12 0.0032000 sec  
 DELTA 0.0000713 sec

===== CHANNEL f1 =====  
 NUC1 13C  
 P1 5.60 usec  
 PL1 11.20 usec  
 PL2 -6.00 dB  
 SF01 75.4752653 MHz

===== CHANNEL f2 =====  
 CPDPRG2 waltz16  
 NUC2 1H  
 P3 10.20 usec  
 PL3 20.40 usec  
 PCPD2 114.00 usec  
 PL2 -6.00 dB  
 PL12 18.00 dB  
 SF02 300.1312005 MHz

F2 - Processing parameters  
 SI 32768  
 SF 75.4677424 MHz  
 KDM no  
 SSB 0  
 LB 0.00 Hz  
 GB 0  
 PC 1.40

1D NMR plot parameters  
 CX 20.00 cm  
 F1P 210.000 ppm  
 F1 15648.23 Hz  
 F2P -10.000 ppm  
 F2 -754.68 Hz  
 PPKCM 11.00000 ppm/cm  
 HZCM 830.14514 Hz/cm

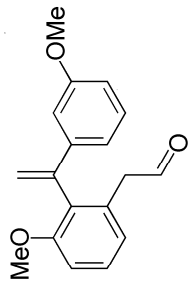

Current Data Parameters  
 NAME jhj-09-11-03  
 EXPNO 1  
 PROCNO 1

F2 - Acquisition Parameters  
 Date\_ 20030911  
 Time 17.56  
 INSTRUM spect  
 PROBHD 5 mm GNP 1H/1  
 PULPROG zg30  
 TD 46294  
 SOLVENT CDCl3  
 NS 16  
 DS 2  
 SWH 6172.839 Hz  
 FIDRES 0.133340 Hz  
 AQ 3.7496641 sec  
 RG 228.1  
 DW 81.000 usec  
 DE 6.00 usec  
 TE 300.0 K  
 D1 1.0000000 sec

===== CHANNEL f1 =====  
 NUC1 1H  
 P1 11.70 usec  
 PL1 0.00 dB  
 SF01 299.8718518 MHz

F2 - Processing parameters  
 SI 32768  
 SF 299.8700159 MHz  
 WDW no  
 SSB 0  
 LB 0.00 Hz  
 GB 0  
 PC 1.00

1D NMR plot parameters  
 CX 20.00 cm  
 F1P 10.000 ppm  
 F1 2998.70 Hz  
 F2P 0.500 ppm  
 F2 149.94 Hz  
 PPM0M 0.47500 ppm/cm  
 HZCM 142.43826 Hz/cm

3.54354  
 3.55034  
 3.68044  
 3.71399  
 3.72849  
 3.74671  
 3.78183  
 3.95162  
 3.98404  
 4.09131  
 4.11506  
 5.12487  
 5.12853  
 5.27584  
 5.97510  
 5.97881  
 6.79477  
 6.79891  
 6.83208  
 6.83534  
 6.84669  
 6.85081  
 6.85742  
 6.86091  
 6.91101  
 6.91379  
 7.17251  
 7.17585  
 7.23997  
 7.28077  
 7.30658  
 7.30826  
 7.33399  
 9.52868  
 9.53552  
 9.54239  
 ppm

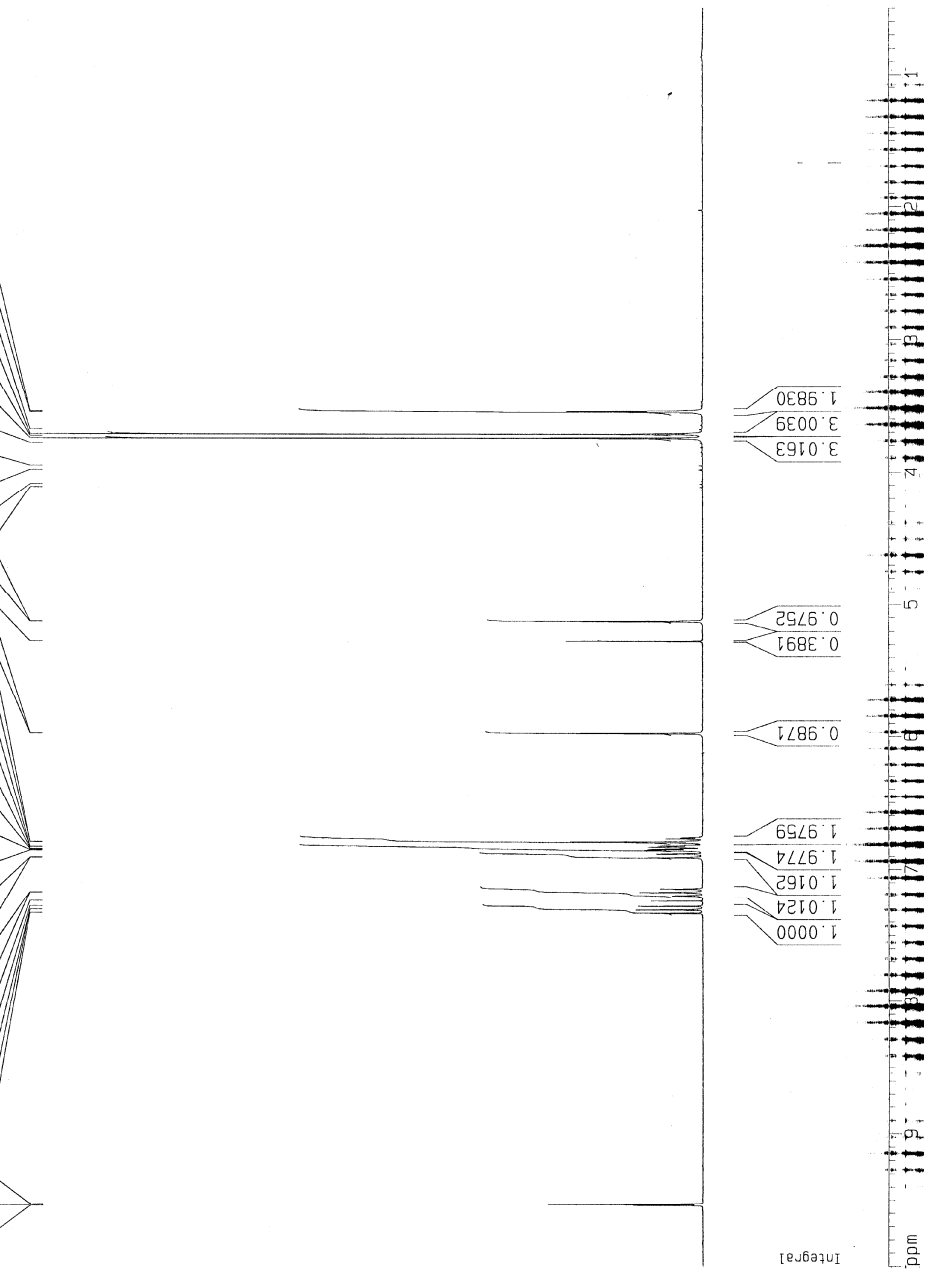

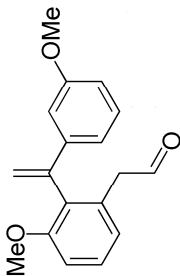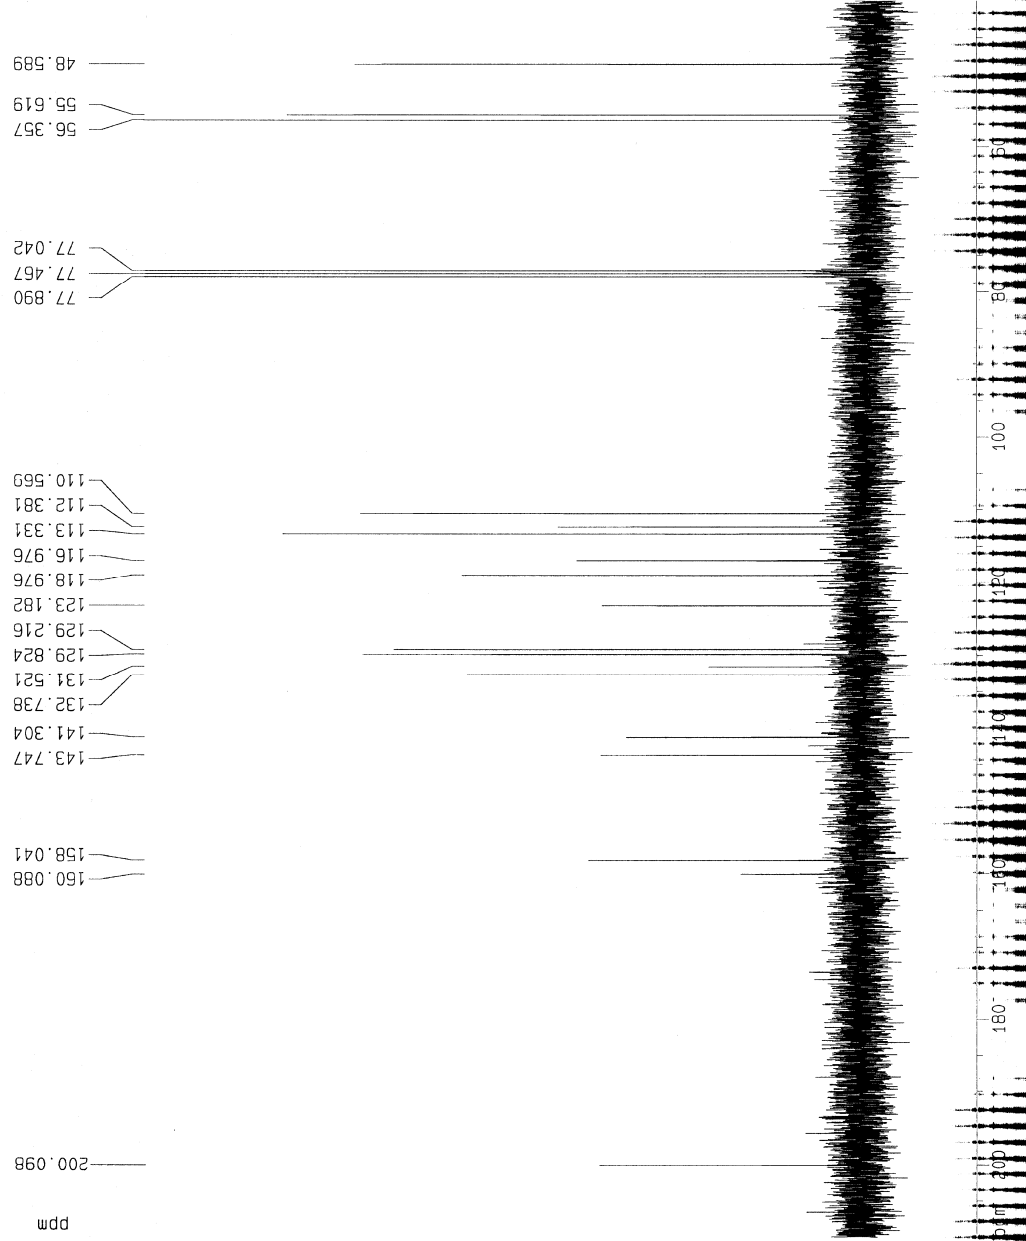

Current: Data Parameters  
 NAME 1hj-09-11-03  
 EXPNO 2  
 PROCNO 1

F2 - Acquisition Parameters  
 Date\_ 20030911  
 Time 18.01  
 INSTRUM spect  
 PROBHD 5 mm QNP 1H/1  
 PULPROG zgpg30  
 TD 65536  
 SOLVENT CDCl3  
 NS 180  
 DS 4  
 SWH 18796.992 Hz  
 FIDRES 0.286819 Hz  
 AQ 1.7433076 sec  
 RG 1024  
 DW 26.600 usec  
 DE 5.00 usec  
 TE 300.0 K  
 D1 2.00000000 sec  
 D11 0.03000000 sec  
 D12 0.00020000 sec

==== CHANNEL f1 =====  
 NUC1 13C  
 P1 5.40 usec  
 PL1 -5.00 dB  
 SF01 75.4105357 MHz

==== CHANNEL f2 =====  
 CPDPRG2 waltz16  
 NUC2 1H  
 P2 115.00 usec  
 PL2 0.00 dB  
 PL12 20.00 dB  
 PL13 20.00 dB  
 SF02 299.8711995 MHz

F2 - Processing parameters  
 SI 32768  
 SF 75.4023410 MHz  
 WDM 0  
 SSB 0  
 LB 0  
 GB 0  
 PC 1.40

1D NMR plot parameters  
 CX 20.00 cm  
 F1 15834.49 Hz  
 F2 40,000 ppm  
 PC 301.09 Hz  
 PR 600000000 ppm/cm  
 PWD 600.0002 Hz/cm

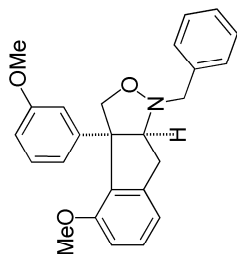

Current Data Parameters  
 NAME jh1-03-05-06  
 EXPNO 1  
 PROCNO 1

F2 - Acquisition Parameters  
 Date\_ 20060305  
 Time 20.06  
 INSTRUM spect  
 PROBHD 5 mm QNP 1H/1  
 PULPROG zg30  
 TO 24890  
 SOLVENT CDCl3  
 NS 16  
 DS 2  
 SWH 6172.839 Hz  
 FIDRES 0.250014 Hz  
 AQ 1.9999400 sec  
 RG 724.1  
 DW 81.000 usec  
 DE 6.00 usec  
 TE 300.0 K  
 D1 1.0000000 sec

\*\*\*\*\* CHANNEL f1 \*\*\*\*\*  
 NUC1 1H  
 P1 11.70 usec  
 PL1 0.00 dB  
 SF01 299.8716516 MHz

F2 - Processing parameters  
 SI 32768  
 SF 299.8700159 MHz  
 MDW no  
 SSB 0  
 LB 0.00 Hz  
 GB 0  
 PC 1.00

1D NMR plot parameters  
 CX 20.00 cm  
 F1P 10.000 ppm  
 F1 2998.70 Hz  
 F2P -0.500 ppm  
 F2 -149.34 Hz  
 PPMCM 0.52500 ppm/cm  
 HZCM 157.43176 Hz/cm

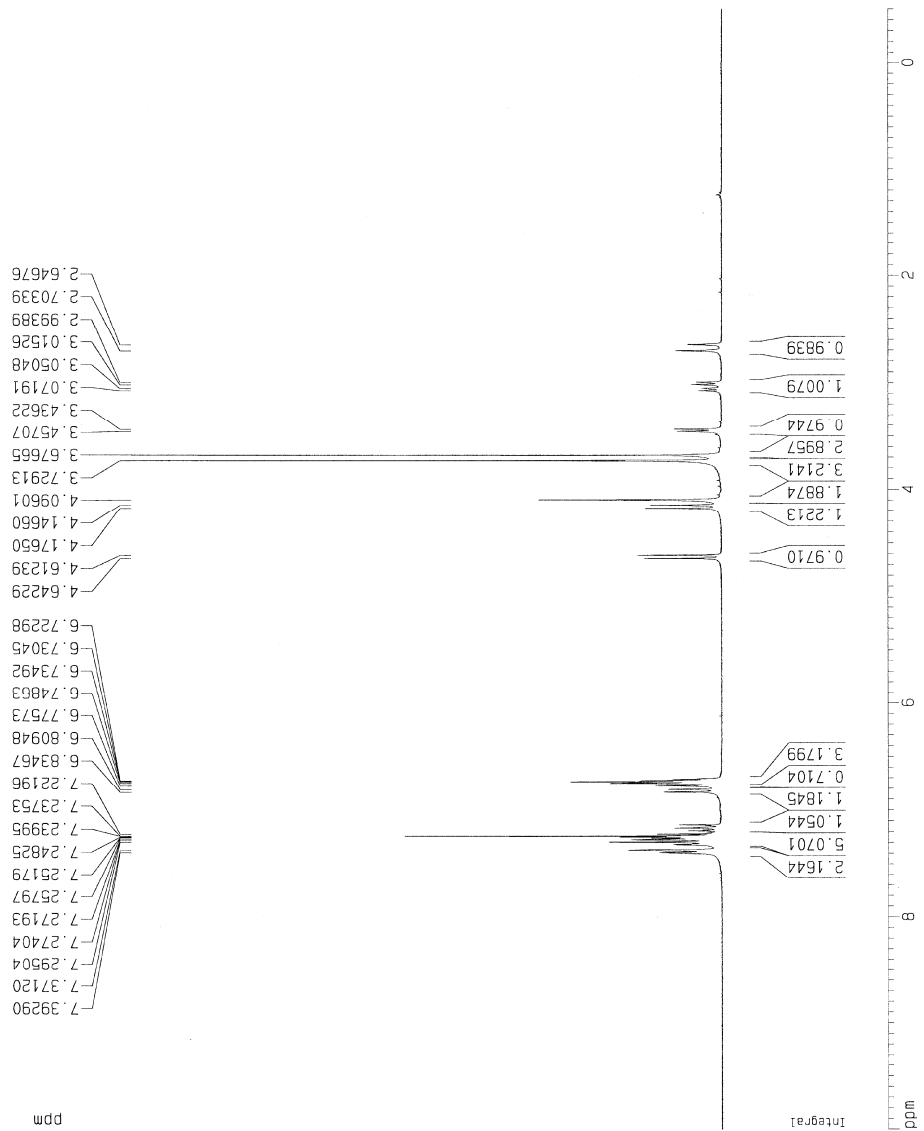

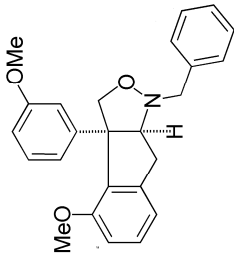

Current Data Parameters  
 NAME j1j-03-06-06  
 EXNO 7  
 PROCNO 1

F2 - Acquisition Parameters  
 Date\_ 20060306  
 Time 1.10  
 INSTRUM spect  
 PROBHD 5 mm QNP 1H/1  
 PULPROG zgpg30  
 TO 65536  
 SOLVENT CDCl3  
 NS 2000  
 DS 4  
 SWH 18796.992 Hz  
 FIDRES 0.286819 Hz  
 AQ 1.7433076 sec  
 RG 512  
 DW 26.600 usec  
 DE 6.00 usec  
 TE 300.0 K  
 D1 2.00000000 sec  
 D11 0.03000000 sec  
 D12 0.00002000 sec

===== CHANNEL f1 =====  
 NUC1 13C  
 P1 5.40 usec  
 PL1 -6.00 dB  
 SF01 75.4106357 MHz

===== CHANNEL f2 =====  
 CPDPRG2 waltz16  
 NUC2 1H  
 PCPD2 115.00 usec  
 PL2 0.00 dB  
 PL12 20.00 dB  
 PL13 20.00 dB  
 SF02 299.8711895 MHz

F2 - Processing parameters  
 SI 32768  
 SF 75.4023972 MHz  
 EX 0  
 SSB 0  
 LB 1.00 Hz  
 GB 0  
 PC 1.40

1D NMR plot parameters  
 CX 20.00 cm  
 F1P 200.000 ppm  
 F1 15090.47 Hz  
 F2P -10.000 ppm  
 F2 -754.02 Hz  
 PPMCM 10.50000 ppm/cm  
 HZCM 791.72479 Hz/cm

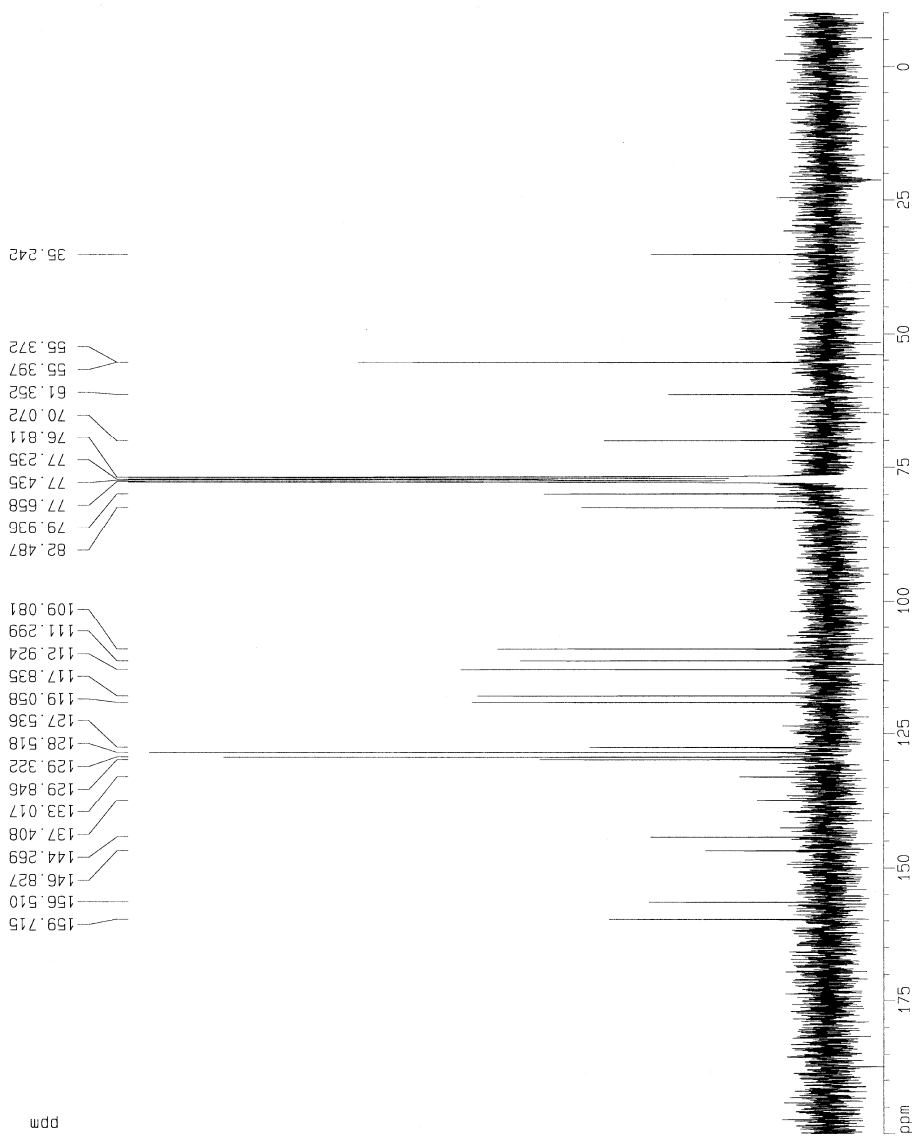

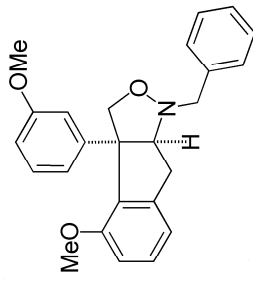

Current Data Parameters  
 NAME jh1-03-06-06  
 EXPNO 8  
 PROCNO 1

F2 - Acquisition Parameters  
 Date\_ 20060306  
 Time 3.16  
 INSTRUM spect  
 PROBHD 5 mm QNP 1H/1  
 PULPROG zgpg30  
 TO 65536  
 SOLVENT CDCl3  
 NS 510  
 DS 4  
 SWH 17885.614 Hz  
 FIDRES 0.274639 Hz  
 AQ 1.8219508 sec  
 RG 16384  
 DW 27.800 usec  
 DE 6.00 usec  
 TE 300.0 K  
 D1 2.0000000 sec  
 D2 0.00357143 sec  
 D12 0.0002000 sec  
 DELTA 0.0000688 sec

===== CHANNEL f1 =====  
 NUC1 13C  
 P1 5.40 usec  
 PL1 10.00 dB  
 RF1 6.00 MHz  
 SFO1 75.4098917 MHz

===== CHANNEL f2 =====  
 CPDPRG2 waltz16  
 NUC2 1H  
 P3 12.40 usec  
 PL3 24.00 dB  
 PL4 115.00 usec  
 PL2 0.00 dB  
 PL12 20.00 dB  
 SFO2 299.8711895 MHz

F2 - Processing parameters  
 SI 32768  
 SF 75.4023573 MHz  
 EQ  
 KW 0  
 SSB 0  
 LB 1.00 Hz  
 GB 0  
 PC 1.40

1D NMR plot parameters  
 CX 20.00 cm  
 F1P 200.000 ppm  
 F1 15080.47 Hz  
 F2P -10.000 ppm  
 F2 -754.02 Hz  
 PPKICK 10.50000 ppm/cm  
 HZCM 791.72479 Hz/cm

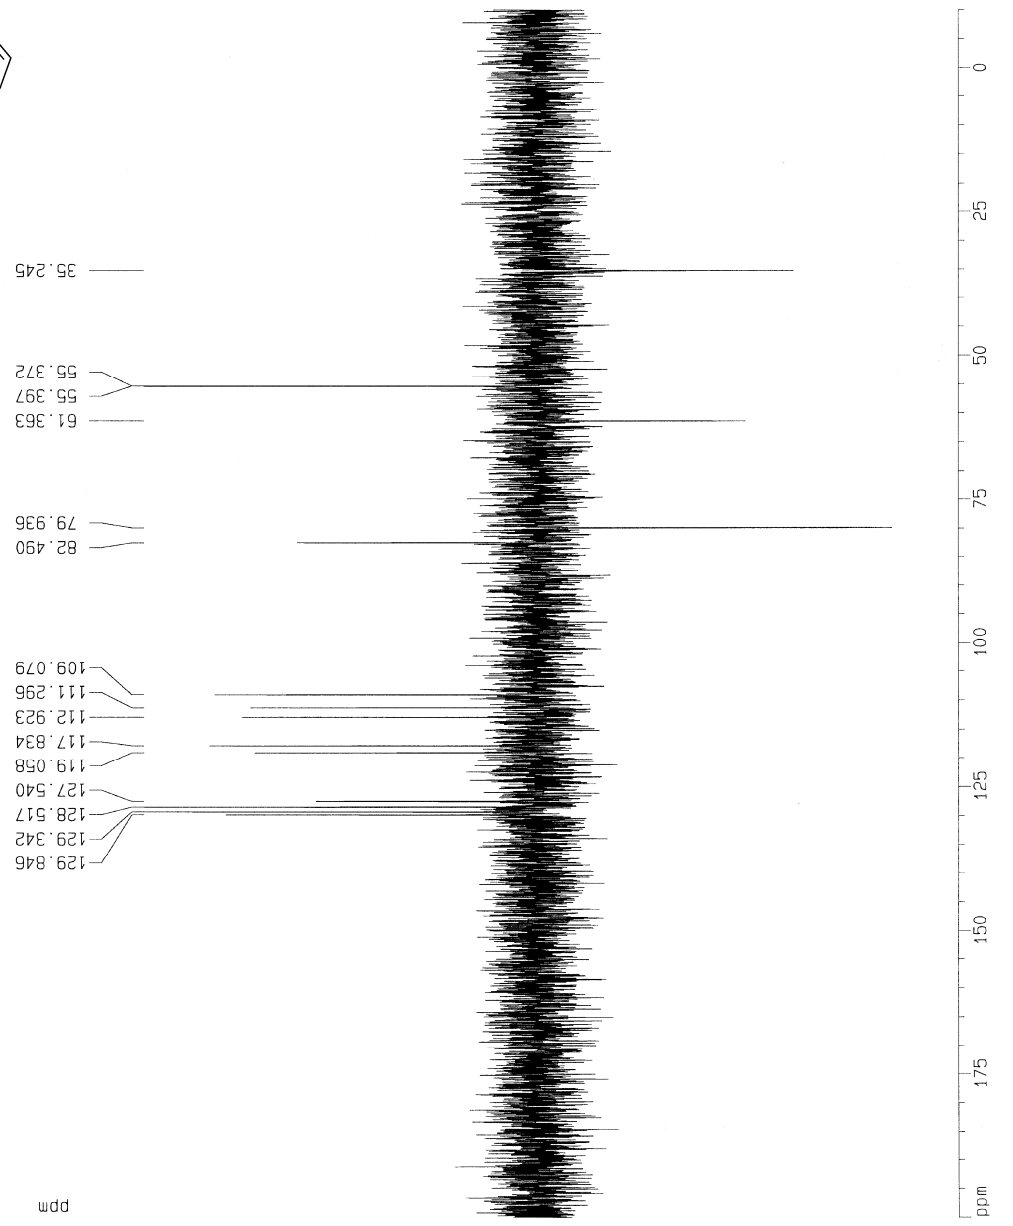

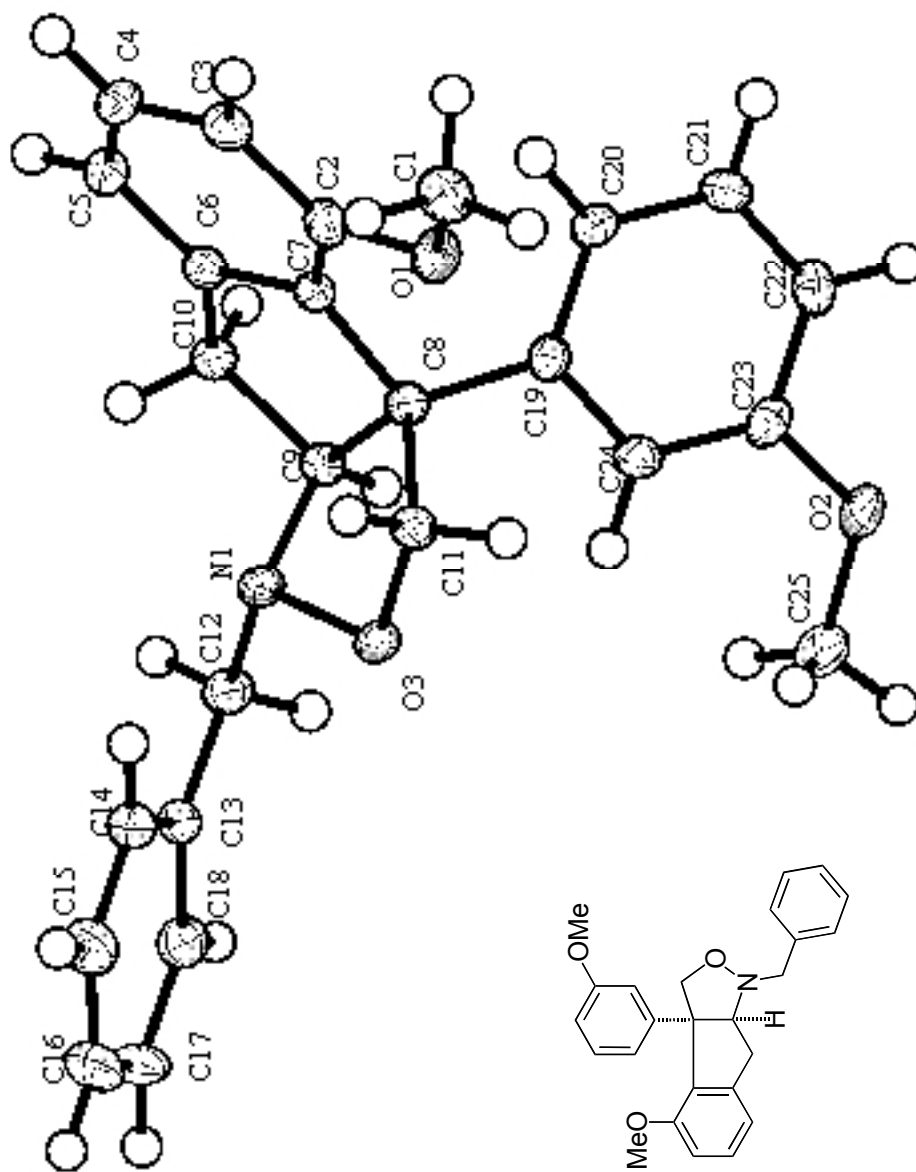



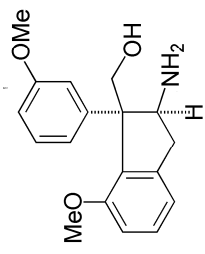

Current Data Parameters  
 NAME jh-10-14-4  
 EXPNO 1  
 PROCNO 1

F2 - Acquisition Parameters  
 Date\_ 20041014  
 Time\_ 13.13  
 INSTRUM spect  
 PROBHD 5 mm BB1 1H-B  
 PULPROG zg30  
 TD 33110  
 SOLVENT CDCl3  
 NS 16  
 DS 2  
 SWH 8278.146 Hz  
 FIDRES 0.250019 Hz  
 AQ 1.9988940 sec  
 RG 90.5  
 DM 60.400 usec  
 DE 6.00 usec  
 TE 300.0 K  
 D1 1.00000000 sec

===== CHANNEL f1 =====  
 NUC1 1H  
 P1 6.45 usec  
 PL1 0.00 dB  
 SF01 400.1324710 MHz

F2 - Processing parameters  
 SI 32768  
 SF 400.1300171 MHz  
 MDW no  
 SSB 0  
 LB 0.00 Hz  
 GB 0  
 PC 1.00

1D NMR plot parameters  
 CX 20.00 cm  
 F1P 10.000 ppm  
 F1 4001.30 Hz  
 F2P -0.500 ppm  
 F2 -200.07 Hz  
 PPMCM 0.52500 ppm/cm  
 HZCM 210.06825 Hz/cm

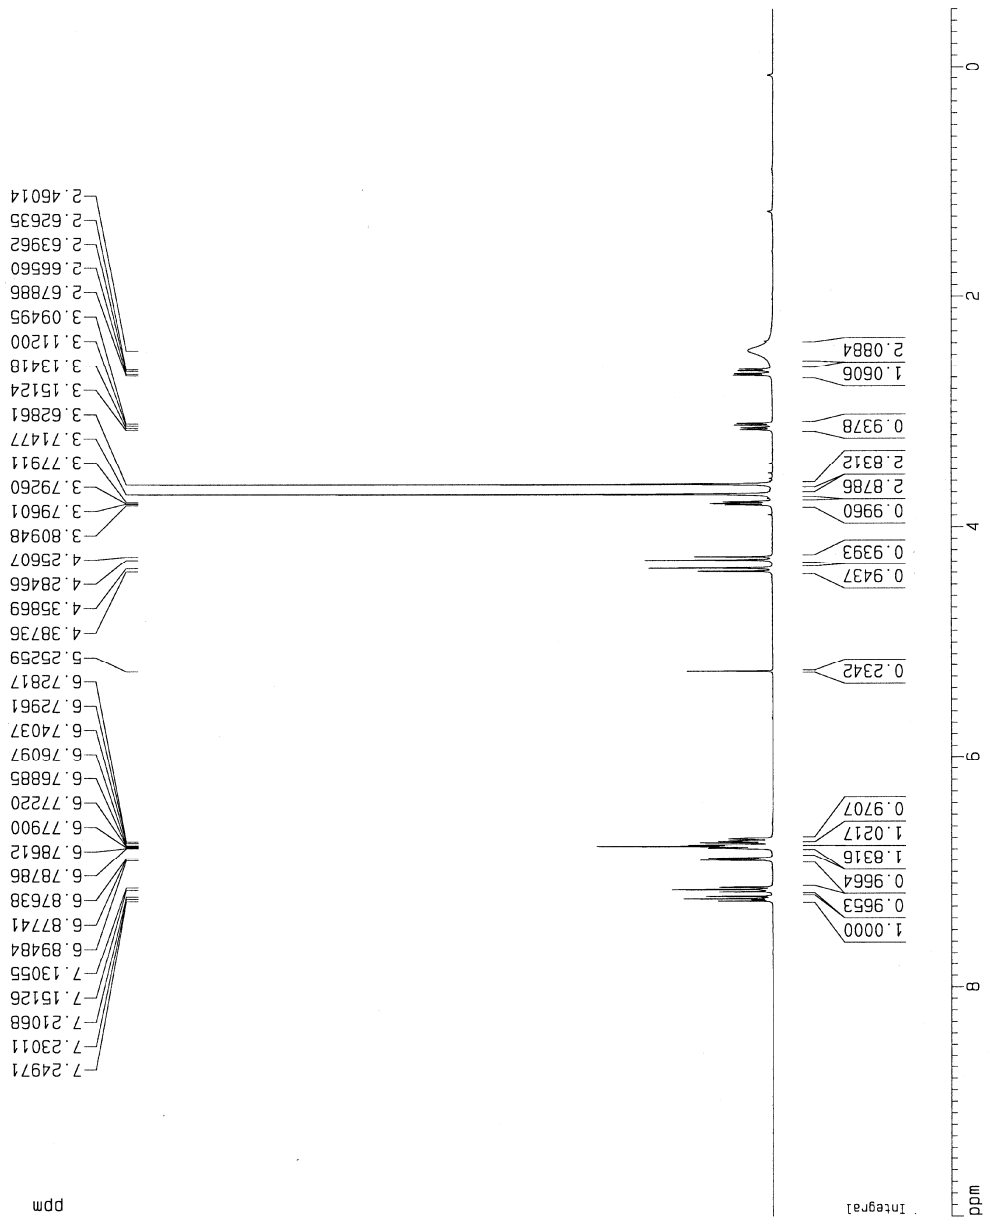

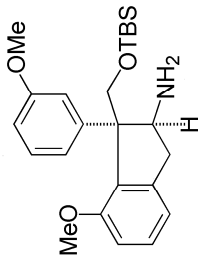

Current Data Parameters  
 NAME jhj-03-06-06  
 EXPNO 1  
 PROCNO 1

F2 - Acquisition Parameters  
 Date\_ 20060306  
 Time 2 31  
 INSTRUM spect  
 PROBHD 5 mm BBI 1H-B  
 PULPROG zg30  
 TD 33110  
 SOLVENT CDCl3  
 NS 16  
 DS 2  
 SWH 8278.146 Hz  
 FIDRES 0.250019 Hz  
 AQ 1.9998940 sec  
 RG 28.5  
 DW 60.400 usec  
 DE 6.00 usec  
 TE 300.0 K  
 D1 1.00000000 sec

===== CHANNEL f1 =====  
 NUC1 1H  
 P1 6.45 usec  
 PL1 0.00 dB  
 SF01 400.1324710 MHz

F2 - Processing parameters  
 SI 32768  
 SF 400.1300174 MHz  
 MDW no  
 SSB 0  
 LB 0.00 Hz  
 GB 0  
 PC 1.00

1D NMR plot parameters  
 CX 20.00 cm  
 F1P 10.000 ppm  
 F1 4001.30 Hz  
 F2P -0.500 ppm  
 F2 -200.07 Hz  
 PPMCM 0.52500 ppm/cm  
 HZCM 210.06895 Hz/cm

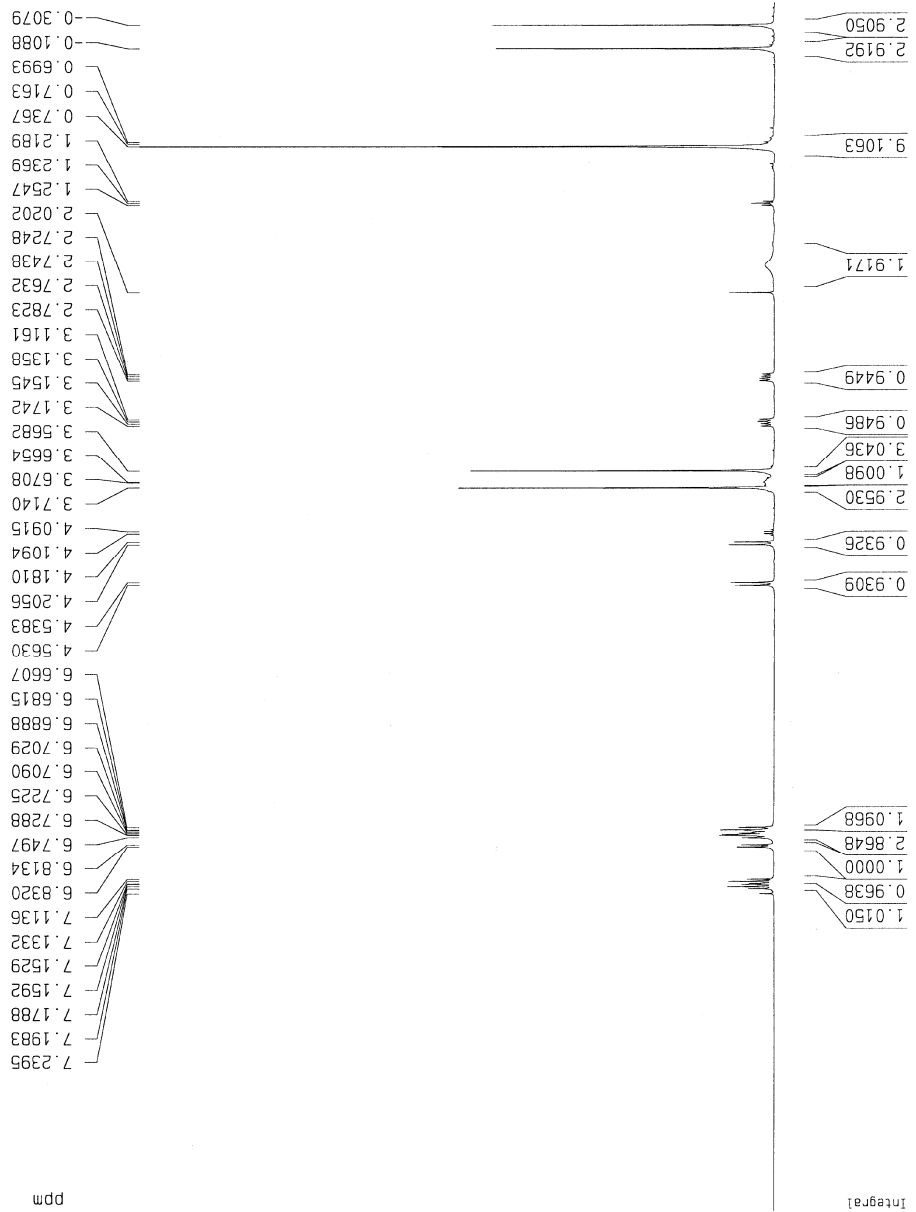

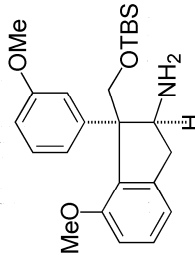

```

Current Data Parameters
NAME      J01-05-06-06
EXPNO    2
PROCNO   1

F2 - Acquisition Parameters
Date_    20060306
Time     2.36
INSTRUM spect
PROBHD   5 mm BBI 1H-5
PULPROG zgpg30
TD        65536
SOLVENT  CDCl3
NS        516
DS        4
SMH       25125.629 Hz
FIDRES    0.393387 Hz
AQ         1.3042164 Sec
RG         9195.2
DN         19.900 usec
DE         6.00 usec
D1         2.0000000 sec
d11        0.0300000 sec
d12        0.0000200 sec

===== CHANNEL f1 =====
NUC1      13C
P1        16.35 usec
PL1       -6.00 dB
SFO1     100.6237959 MHz

===== CHANNEL f2 =====
CPDPRG2   waltz16
NUC2       1H
PCPD2     114.00 usec
PL2        0.00 dB
PL12      24.00 dB
PL13      24.00 dB
SFO2     400.1316005 MHz

F2 - Processing parameters
SI        32768
SF       100.6127530 MHz
WDW       EM
SSB       0
LB        1.00 Hz
GB         0
PC        1.40

1D NMR plot parameters
CX        20.00 cm
F1P       200.000 ppm
F1        20122.85 Hz
F2P       -10.000 ppm
F2        -1006.13 Hz
PPCKX    10.50000 ppm/cm
PCPKX    1051.23265 Hz/cm
  
```

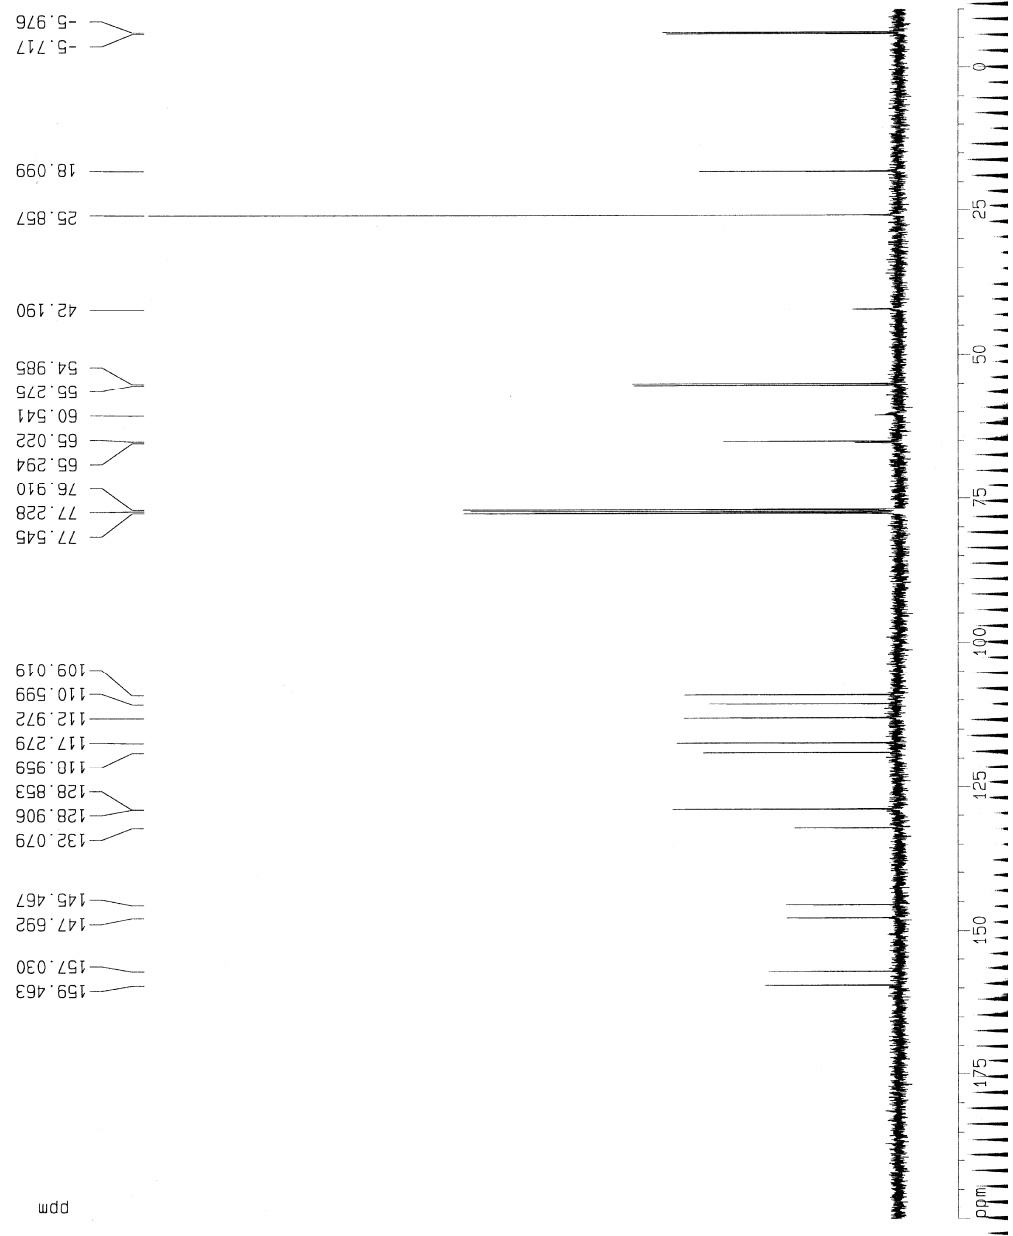

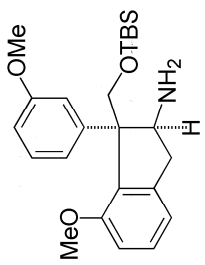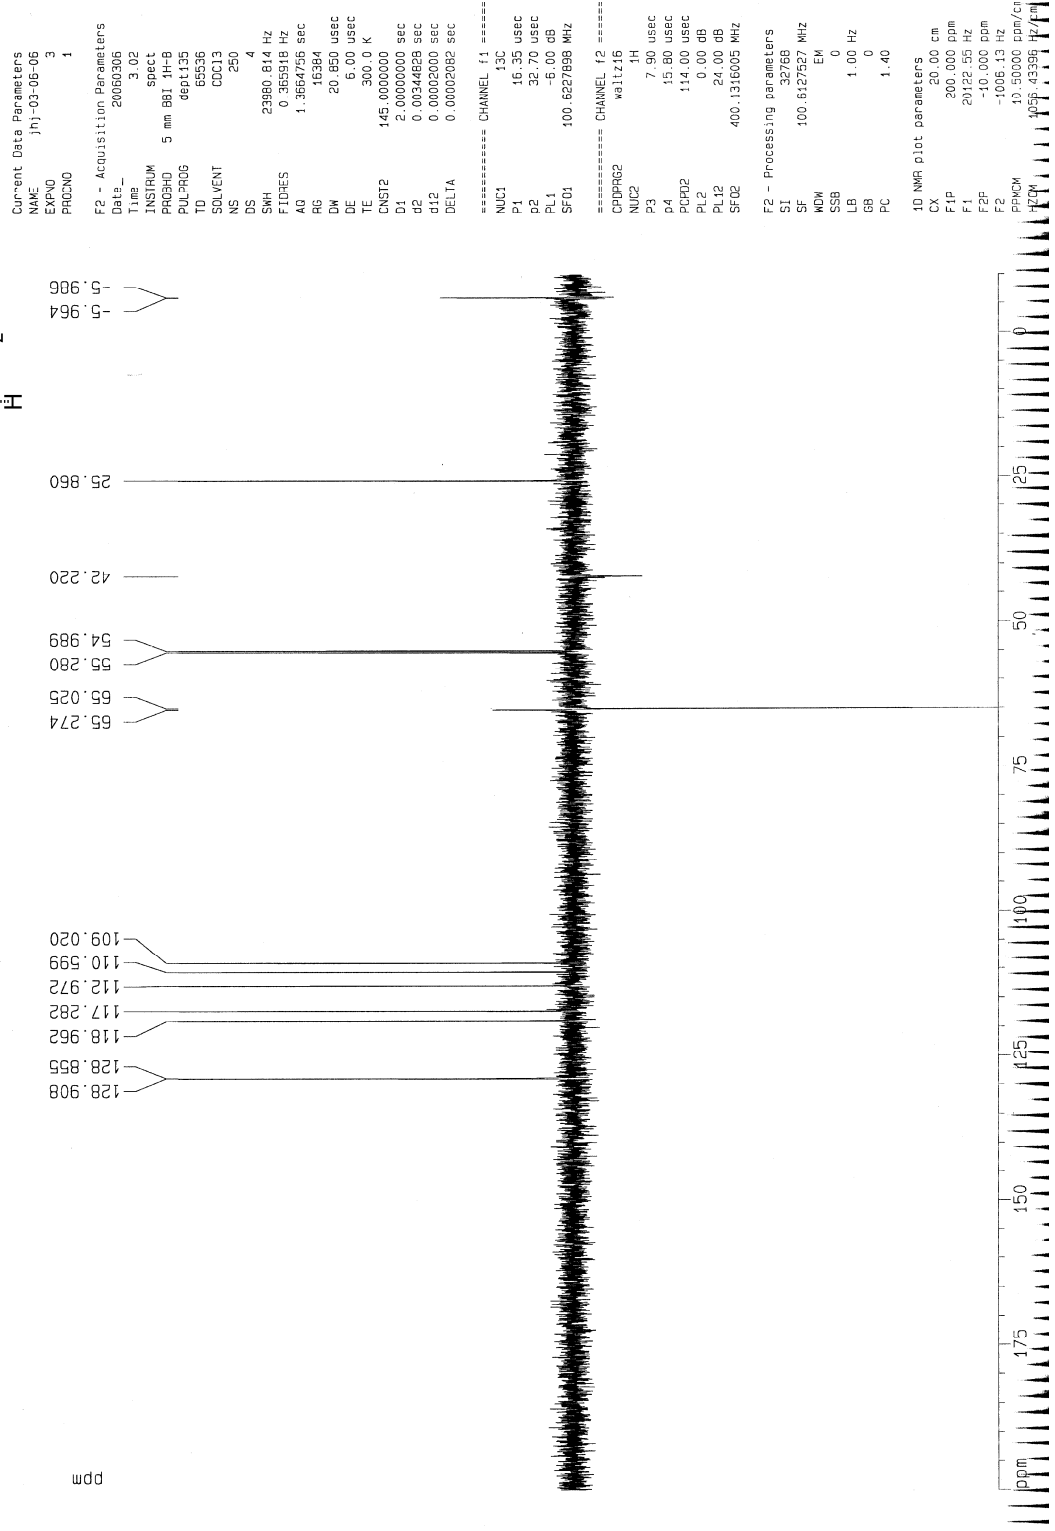

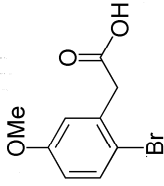

Current Data Parameters  
 NAME jhj-03-06-06  
 EXPNO 4  
 PROCNO 1

F2 - Acquisition Parameters  
 Date\_ 20060306  
 Time\_ 3.21  
 INSTRUM spect  
 PROBHD 5 mm BBI 1H-B  
 PULPROG zg30  
 TD 33110  
 SOLVENT CDCl3  
 NS 16  
 DS 2  
 SWH 8278.146 Hz  
 FIDRES 0.250019 Hz  
 AQ 1.9989940 sec  
 RG 161  
 DW 60.400 usec  
 DE 6.00 usec  
 TE 300.0 K  
 D1 1.0000000 sec

===== CHANNEL f1 =====  
 NUC1 1H  
 P1 6.45 usec  
 PL1 0.00 dB  
 SF01 400.1324710 MHz

F2 - Processing parameters  
 SI 32768  
 SF 400.1300176 MHz  
 WDW no  
 SSB 0  
 LB 0.00 Hz  
 GB 0  
 PC 1.00

1D NMR plot parameters  
 CX 20.00 cm  
 F1P 10.000 ppm  
 F1 4001.30 Hz  
 F2P -0.500 ppm  
 F2 -200.07 Hz  
 PPMCM 0.52500 ppm/Cr  
 HZCM 210.06825 Hz/cm

0.05673  
 0.86749  
 0.88418  
 1.23847  
 1.25931

3.85785  
 3.86333  
 3.87658  
 3.94076

6.69179  
 6.69935  
 6.71377  
 6.72133  
 6.73863  
 6.82510  
 6.83263  
 7.23975  
 7.24620  
 7.24747  
 7.24876  
 7.25001  
 7.25133  
 7.42330  
 7.43206  
 7.44526  
 7.47883  
 7.50104

ppm

3.0000  
 2.2552

1.0765  
 1.0804  
 1.0511

Integral

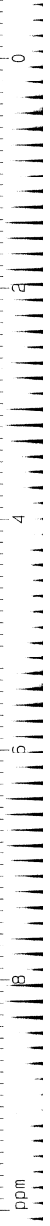

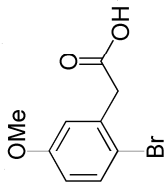

```

Current Data Parameters
NAME      J11-03-06-06
EXPNO    5
PROCNO   1

F2 - Acquisition Parameters
Date_    20060306
Time     3.24
INSTRUM  spect
PROBHD   5 mm BBI (H-B
PULPROG  zgpg30
TD       65536
SOLVENT  CDCl3
NS       500
DS       4
SWH      25125.629 Hz
FIDRES   0.383387 Hz
AQ       1.3042164 sec
RG       8192
DQ       19.900 usec
DE       6.00 usec
TE       300.0 K
D1       2.00000000 sec
d11      0.03000000 sec
d12      0.00002000 sec

===== CHANNEL f1 =====
NUC1     13C
P1       16.35 usec
PL1      -6.00 dB
SFO1     100.6237959 MHz

===== CHANNEL f2 =====
CPDPRG2  waltz16
NUC2     1H
PCPD02   114.00 usec
PL2      0.00 dB
PL12     24.00 dB
PL13     24.00 dB
SFO2     400.1316005 MHz

F2 - Processing parameters
SI       32768
SF       100.6127492 MHz
WDW      EM
SSB      0
LB       1.00 Hz
GB       0
PC       1.40

1D NMR plot parameters
CX       20.00 cm
F1P      215.000 ppm
F1       21631.74 Hz
F2P      -5.000 ppm
F2       -503.05 Hz
PPMCM    11.00000 ppm/cm
H1W1M    11.00000 Hz/cm
  
```

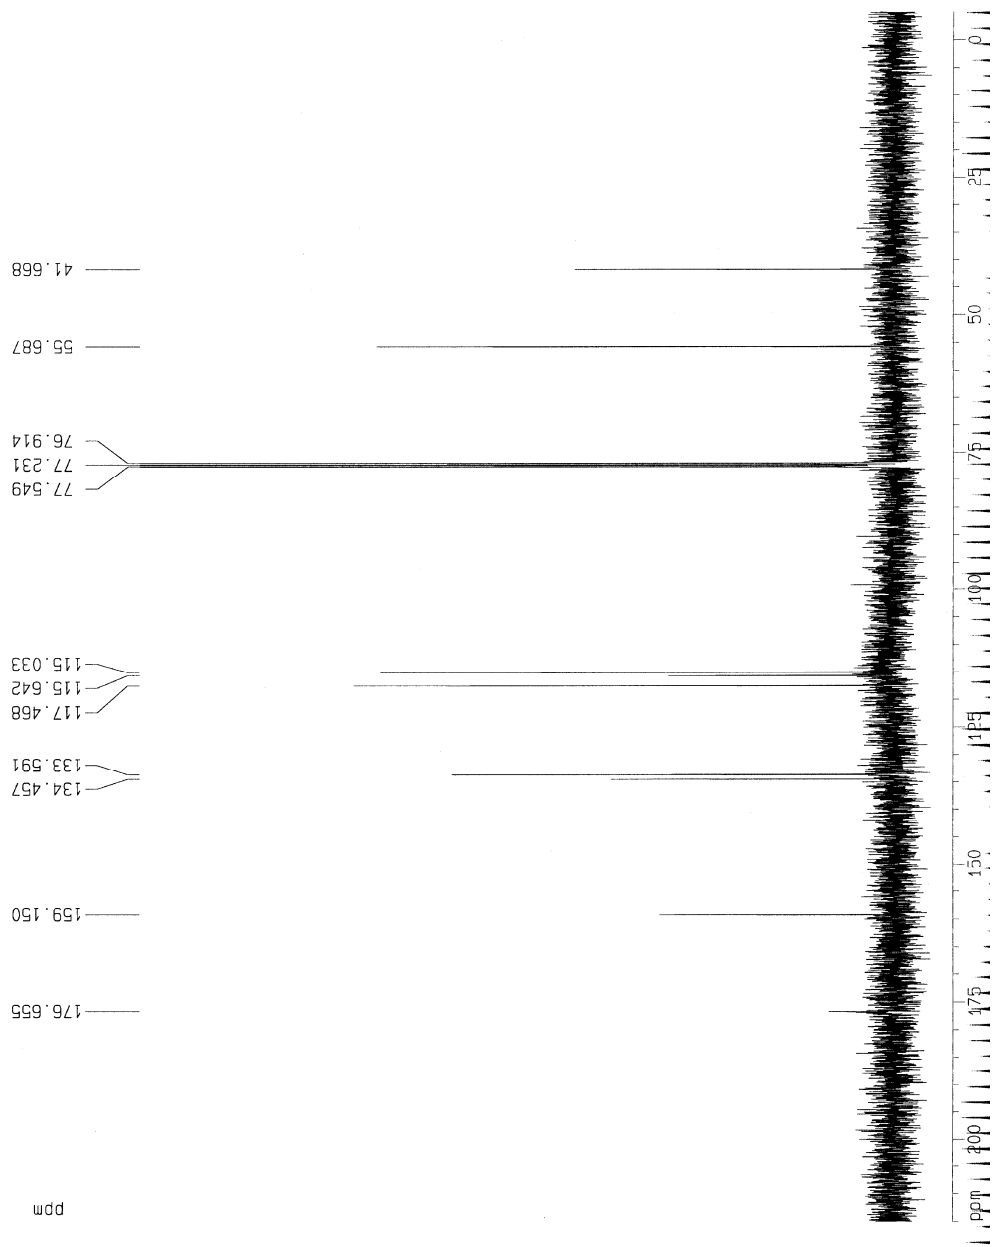

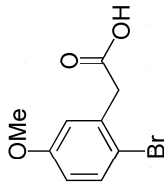

Current Data Parameters  
 NAME jh-03-0E-06  
 EXRNO 6  
 PROCNO 1

F2 - Acquisition Parameters

Date\_ 20060306  
 Time 2.51  
 INSTRUM spect  
 PROBHD 5 mm BB1 IH-B  
 PULPROG dept135  
 TD 65536  
 SOLVENT CCCl3  
 NS 106  
 DS 4  
 SWH 23980.814 Hz  
 FIDRES 0.365918 Hz  
 AQ 1.3664756 sec  
 RG 16384  
 DW 20.850 usec  
 DE 6.00 usec  
 TE 300.0 K  
 CNST12 145.0000000  
 D1 2.00000000 sec  
 d2 0.00344828 sec  
 d12 0.00002000 sec  
 DELTA 0.00002082 sec

===== CHANNEL f1 =====  
 NUC1 13C  
 P1 16.35 usec  
 P2 32.70 usec  
 PL1 -6.00 dB  
 SF01 100.6227698 MHz

===== CHANNEL f2 =====  
 CPDPRG2 waltz15  
 NUC2 1H  
 P3 7.90 usec  
 P4 15.80 usec  
 PCPD2 114.00 usec  
 PL2 0.00 dB  
 PL12 24.00 dB  
 SF02 400.1318005 MHz

F2 - Processing parameters  
 SI 32768  
 SF 100.6127491 MHz  
 MDK EM  
 SSB 0  
 LB 1.00 Hz  
 GB 0  
 PC 1.40

1D NMR plot parameters  
 CX 20.00 cm  
 F1p 200.000 ppm  
 F1 20422.55 Hz  
 F2p -10.000 ppm  
 F2 -1006.13 Hz  
 PPMCM 10.5000 ppm/cm  
 Hz/cm 1066.1334 Hz/cm

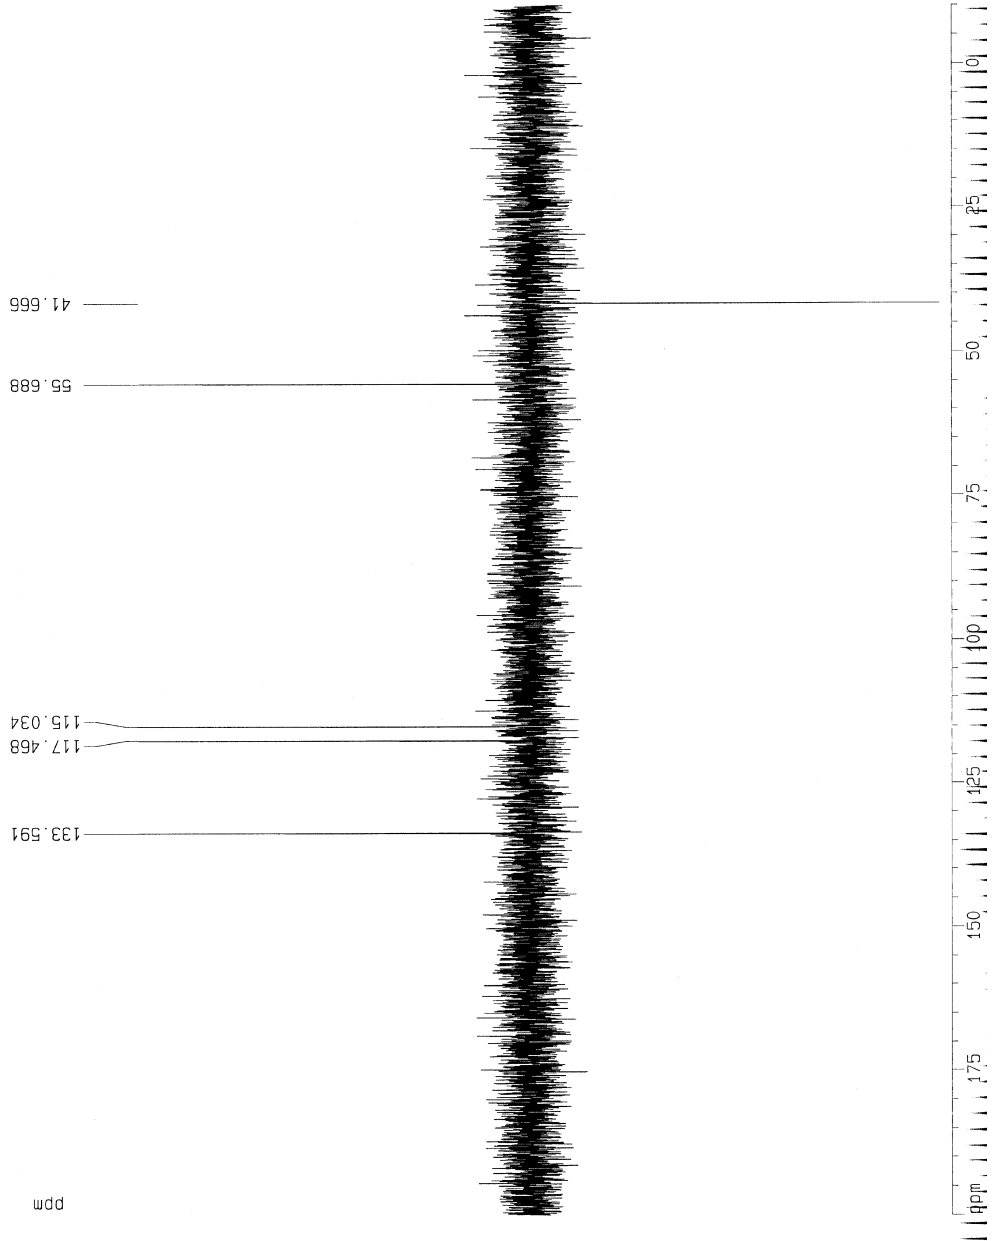

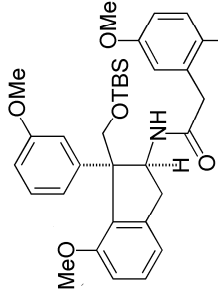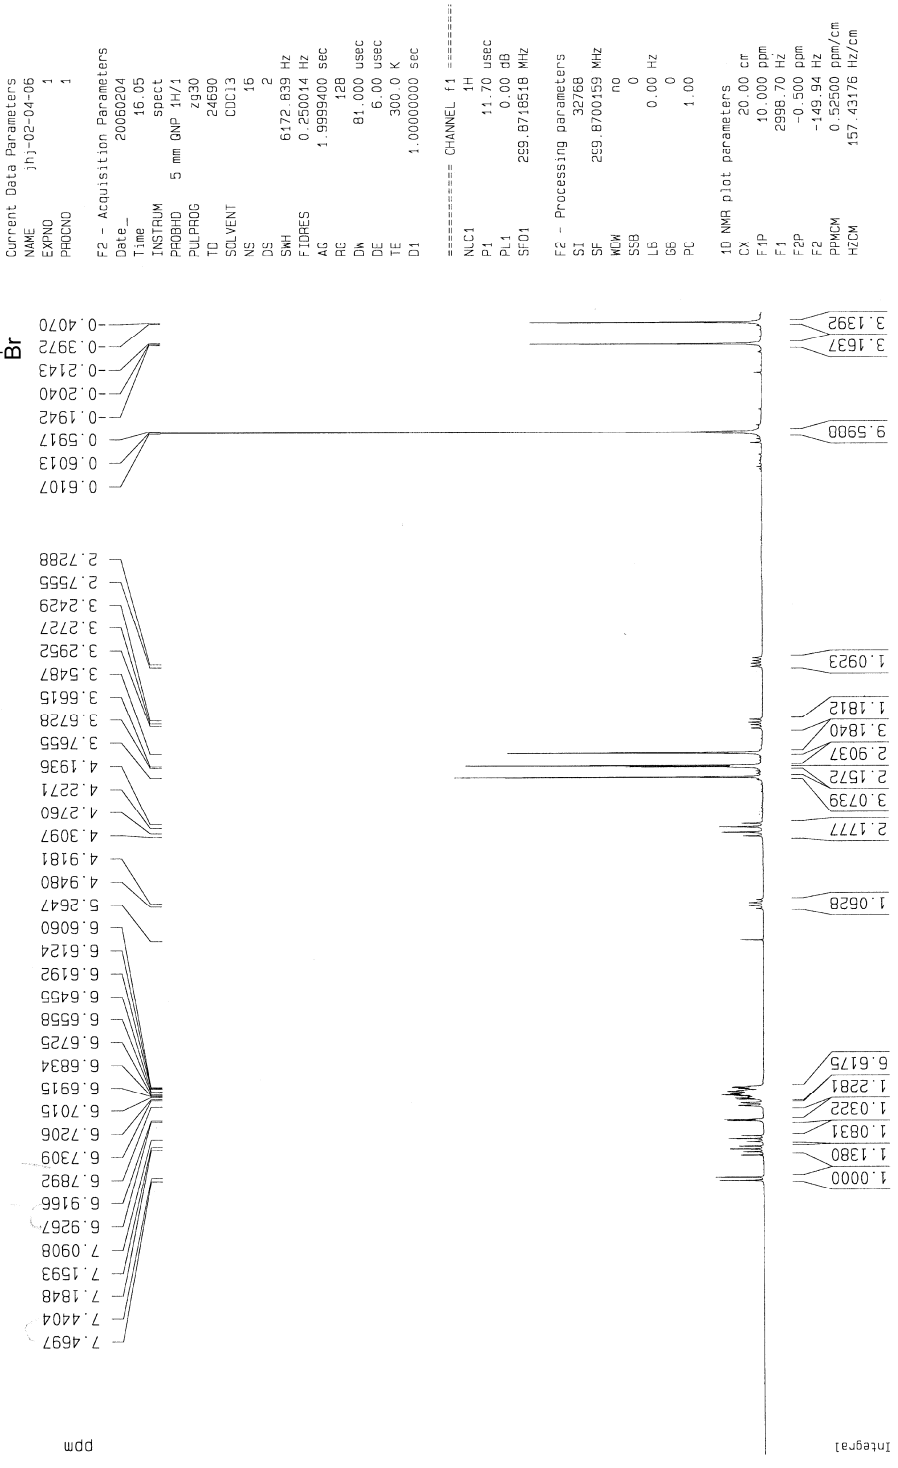



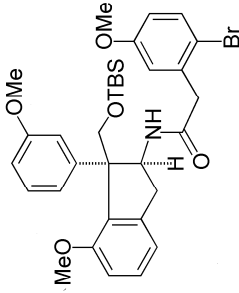

Current Data Parameters  
 NAME jh1-02-04-06  
 EXPNO 2  
 PROCNO 1

F2 - Acquisition Parameters  
 Date\_ 2006204  
 Time 16.08  
 INSTRUM spect  
 PROBHD 5 mm GNP 1H/1  
 PULPROG zgpg30  
 TD 65536  
 SOLVENT CDCl3  
 NS 150  
 DS 4  
 SWH 18786.392 Hz  
 FIDRES 0.286319 Hz  
 AQ 1.7433076 sec  
 RG 512  
 DE 25.600 usec  
 TE 300.0 K  
 D1 2.00000000 sec  
 D11 0.03000000 sec  
 D12 0.00002000 sec

===== CHANNEL f1 =====  
 NUC1 13C  
 P1 5.40 usec  
 PL1 -6.00 dB  
 SF01 75.4106357 MHz

===== CHANNEL f2 =====  
 CPDPRG2 waltz16  
 NUC2 1H  
 P2 115.00 usec  
 PL2 0.00 dB  
 PL3 20.00 dB  
 PL13 20.00 dB  
 SF02 299.8711995 MHz

F2 - Processing parameters  
 SI 32768  
 SF 75.4023607 MHz  
 ADW EM  
 SSB 0  
 LB 1.00 Hz  
 GB 0  
 PC 1.40

1D NMR plot parameters  
 CX 20.00 cm  
 F1P 200.000 ppm  
 F1 15080.47 Hz  
 F2P -10.000 ppm  
 F2 -754.02 Hz  
 PPMCM 10.50000 ppm/cm  
 HZCM 791.72479 Hz/cm

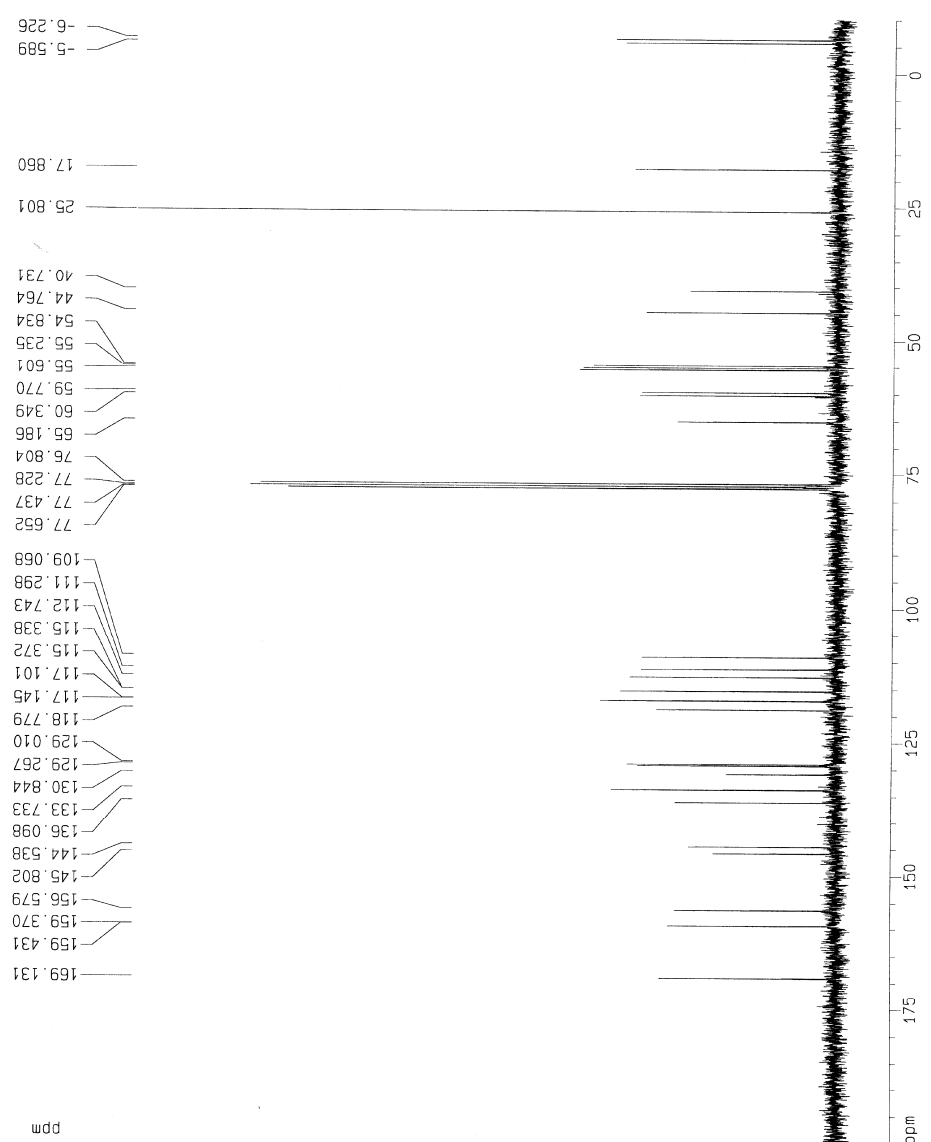

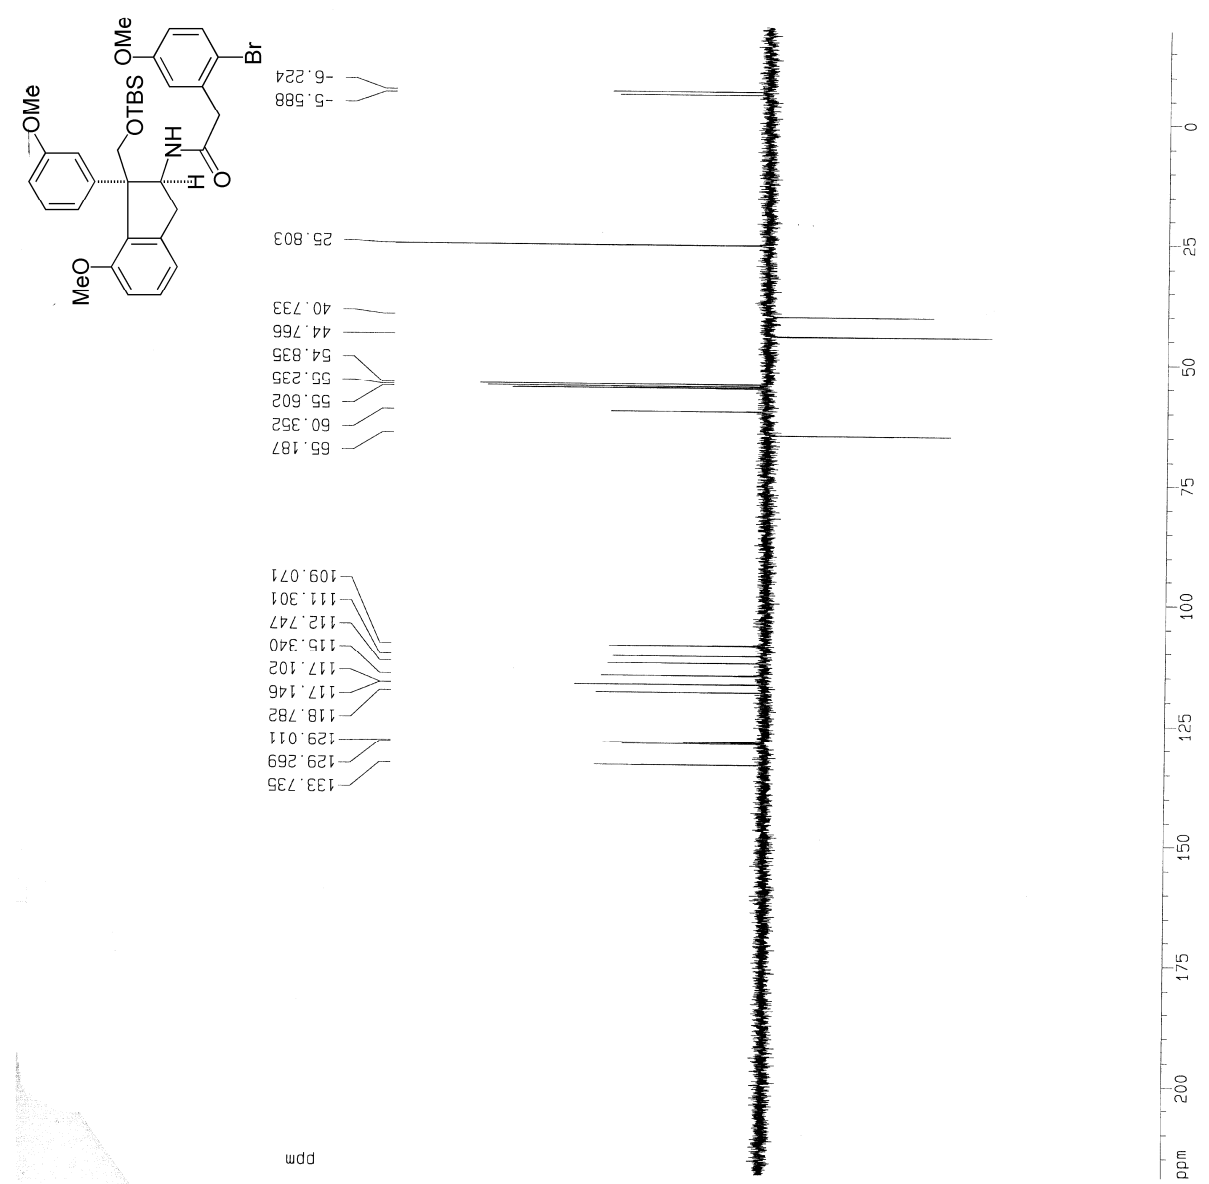

Current Data Parameters  
 NAME jnj-02-04-06  
 EXPNO 3  
 PROCNO 1

F2 - Acquisition Parameters  
 Date\_ 20060204  
 Time\_ 5.18  
 INSTRUM spect  
 PROBHD 5 mm QNP 1H/1  
 PULPROG zgpg30  
 TD 65536  
 SOLVENT CDCl3  
 NS 75  
 DS 2  
 SWH 17086.614 Hz  
 FIDRES 0.214033 Hz  
 AQ 1.8618500 sec  
 RG 327.884  
 OW 27.600 usec  
 DE 5.00 usec  
 TE 300.0 K  
 D1 2.0000000 sec  
 D2 0.0037743 sec  
 D12 0.0002000 sec  
 DELTA 0.0000000 sec

\*\*\*\*\* CHANNEL f1 \*\*\*\*\*  
 NUC1 13C  
 P1 3.40 usec  
 PL1 17.60 dB  
 SFO1 75.409817 MHz

\*\*\*\*\* CHANNEL f2 \*\*\*\*\*  
 CPDPRG2 waltz16  
 NUC2 1H  
 P3 12.40 usec  
 P4 24.80 usec  
 PCPD2 115.00 usec  
 PL2 0.00 dB  
 PL12 20.00 dB  
 SFO2 299.871985 MHz

F2 - Processing parameters  
 SI 32768  
 SF 75.4023605 MHz  
 MDW 0  
 EM 0  
 LB 1.00 Hz  
 GB 0  
 PC 1.40

10 NMR plot parameters  
 CX 20.00 cm  
 F1P 219.012 ppm  
 F1 16513.89 Hz  
 F2P -19.517 ppm  
 F2 -1471.62 Hz  
 PPM 11.02643 mm/m

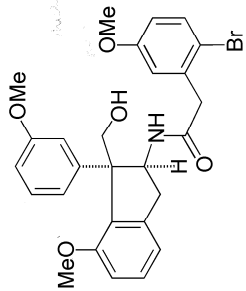

Current Data Parameters  
 NAME jh1-02-04-06  
 EXPNO 4  
 PROCNO 1

F2 - Acquisition Parameters  
 Date\_ 20060204  
 Time 19:53  
 INSTRUM spect  
 PROBHD 5 mm Multinu  
 PULPROG zg30  
 TD 24690  
 SOLVENT CDCl3  
 NS 16  
 DS 2  
 SWH 6172.839 Hz  
 FIDRES 0.250014 Hz  
 AQ 1.9999400 sec  
 RG 362  
 DM 81.000 usec  
 DE 6.00 usec  
 TE 300.0 K  
 D1 1.00000000 sec

\*\*\*\*\* CHANNEL f1 \*\*\*\*\*  
 NUC1 1H  
 P1 9.60 usec  
 PL1 -6.00 dB  
 SF01 300.1318534 MHz

F2 - Processing parameters  
 SI 32768  
 SF 300.1300124 MHz  
 WDW nc  
 SSB 0  
 LB 0.00 Hz  
 GB 0  
 PC 1.00

1D NMR plot parameters  
 CX 20.00 cm  
 F1P 10.000 ppm  
 F1 3001.30 Hz  
 F2P -0.500 ppm  
 F2 -150.07 Hz  
 PPMCM 0.52500 ppm/cm  
 HZCM 157.56825 Hz/cm

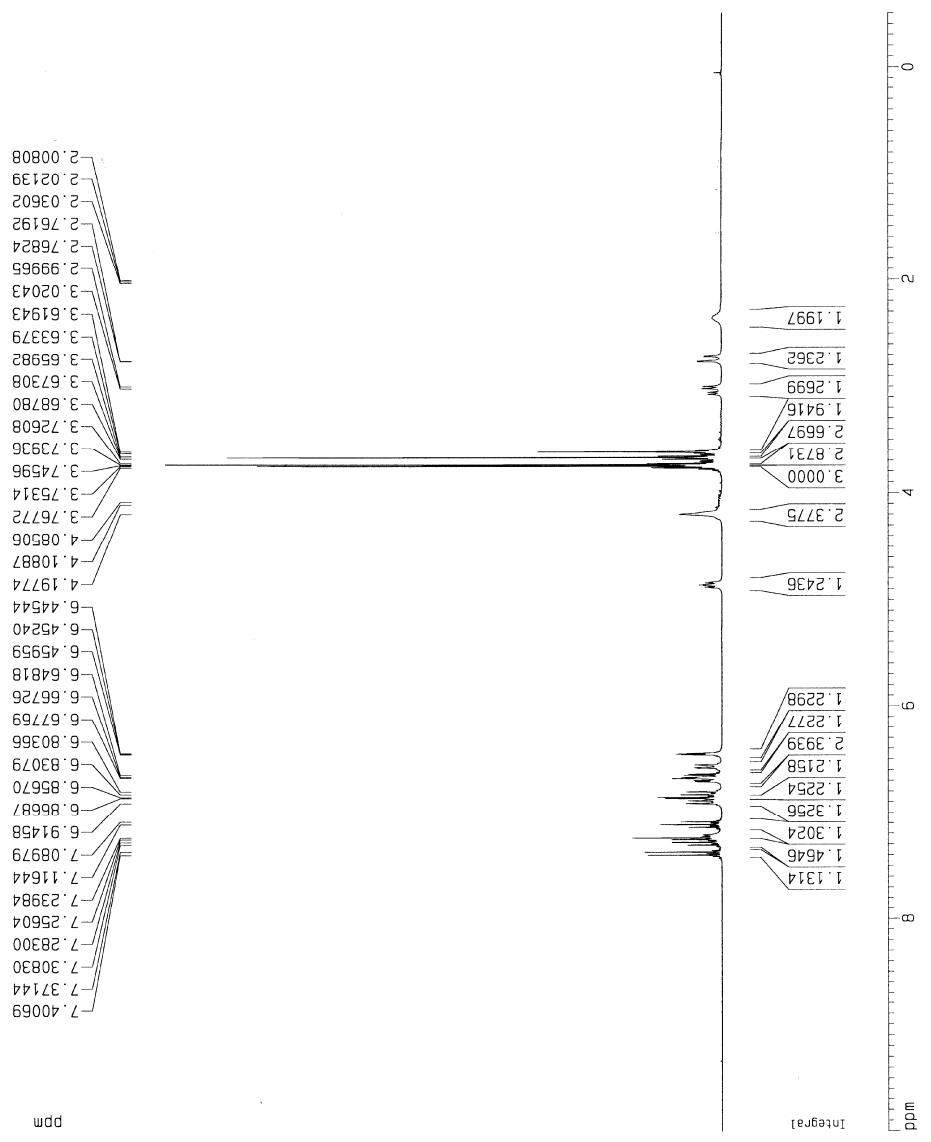

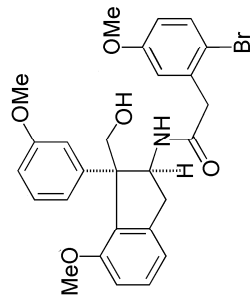

```

Current Data Parameters
NAME      jhj-02-04-06
EXPNO    5
PROCNO   1

F2 - Acquisition Parameters
Date_    20060204
Time     19.58
INSTRUM spect
PROBHD   5 mm Multinu
PULPROG zgpg30
TD       65536
SOLVENT  CDCl3
NS       200
DS       4
SWH      18832.383 Hz
FIDRES   0.287360 Hz
AQ       1.7400308 sec
RG       13004
DM       26.560 usec
DE       6.00 usec
TE       300.0 K
D1       2.00000000 sec
d11      0.05000000 sec
d12      0.00020000 sec

===== CHANNEL f1 =====
NUC1     13C
P1       11.80 usec
PL1      0.00 dB
SFO1     75.4764200 MHz

===== CHANNEL f2 =====
CPDPRG2  waltz16
NUC2     1H
PCPD2    110.00 usec
PL2      0.00 dB
PL12     17.50 dB
PL13     17.50 dB
SFO2     300.1312005 MHz

F2 - Processing parameters
SI       32768
SF       75.467358 MHz
WDW      EM
SSB      0
LB       1.00 Hz
GB       0
PC       1.40

1D NMR plot parameters
CX       20.00 cm
F1P      200.000 ppm
F1       15093.85 Hz
F2P      -10.000 ppm
F2       -754.68 Hz
PPMCM    10.50000 ppm/cm
HZCM     792.41119 Hz/cm

```

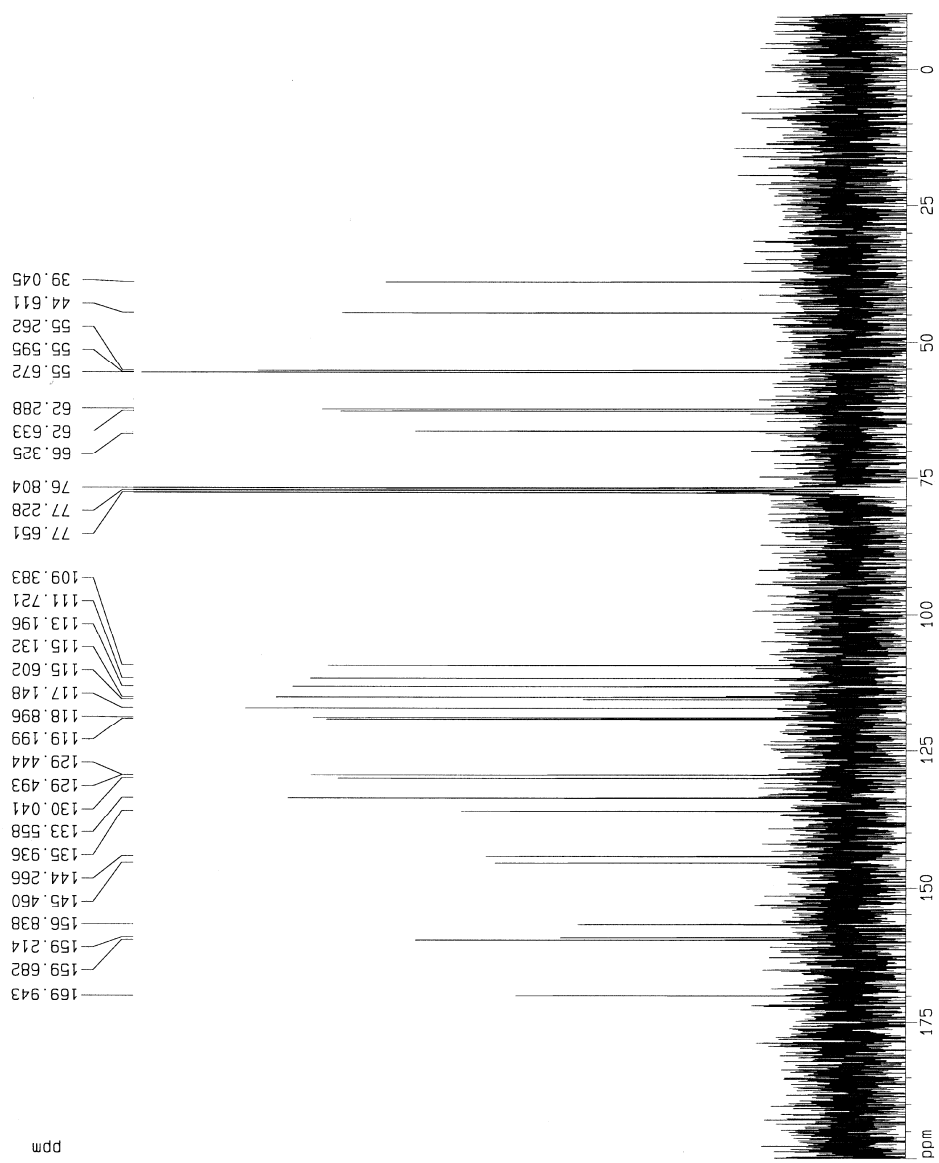

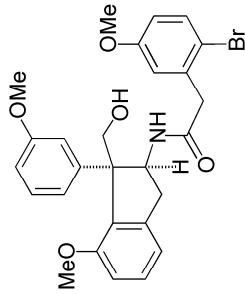

Current Data Parameters  
 NAME jh1-02-04-06  
 EXPNO 6  
 PROCNO 1

F2 - Acquisition Parameters  
 Date\_ 20060204  
 Time 20:10  
 INSTRUM spect  
 PROBHD 5 mm Multinu  
 PULPROG dept135  
 TD 65536  
 SOLVENT CDCl3  
 NS 97  
 DS 4  
 SWH 17995.61 Hz  
 FIDRES 0.274439 Hz  
 AQ 1.8219508 sec  
 RG 16384  
 DW 27.800 usec  
 DE 6.00 usec  
 TE 300.0 K  
 CANSY2 145.000000  
 D1 2.0000000 sec  
 d2 0.0034628 sec  
 d12 0.0002800 sec  
 DELTA 0.0000159 sec

\*\*\*\*\* CHANNEL f1 \*\*\*\*\*  
 NUC1 11.80 usec  
 P1 23.60 usec  
 PL1 0.00 dB  
 SF01 75.4752653 MHz

\*\*\*\*\* CHANNEL f2 \*\*\*\*\*  
 NUC2 wa11715  
 P3 15.25 usec  
 P4 30.50 usec  
 PCPD2 110.00 usec  
 PL2 0.00 dB  
 PL12 17.50 dB  
 SF02 300.1312005 MHz

F2 - Processing parameters  
 SI 32768  
 SF 75.4677357 MHz  
 WDW EM  
 SSB 0  
 LB 1.00 Hz  
 GB 0  
 PC 1.40

ID NHF plot parameters  
 CX 20.00 cm  
 F1P 200.000 ppm  
 F2 15093.155 Hz  
 F3 150.93155 ppm  
 F4 150.93155 ppm  
 PRMCM 10.50000 cm/cm  
 HZCM 792.41115 Hz/cm

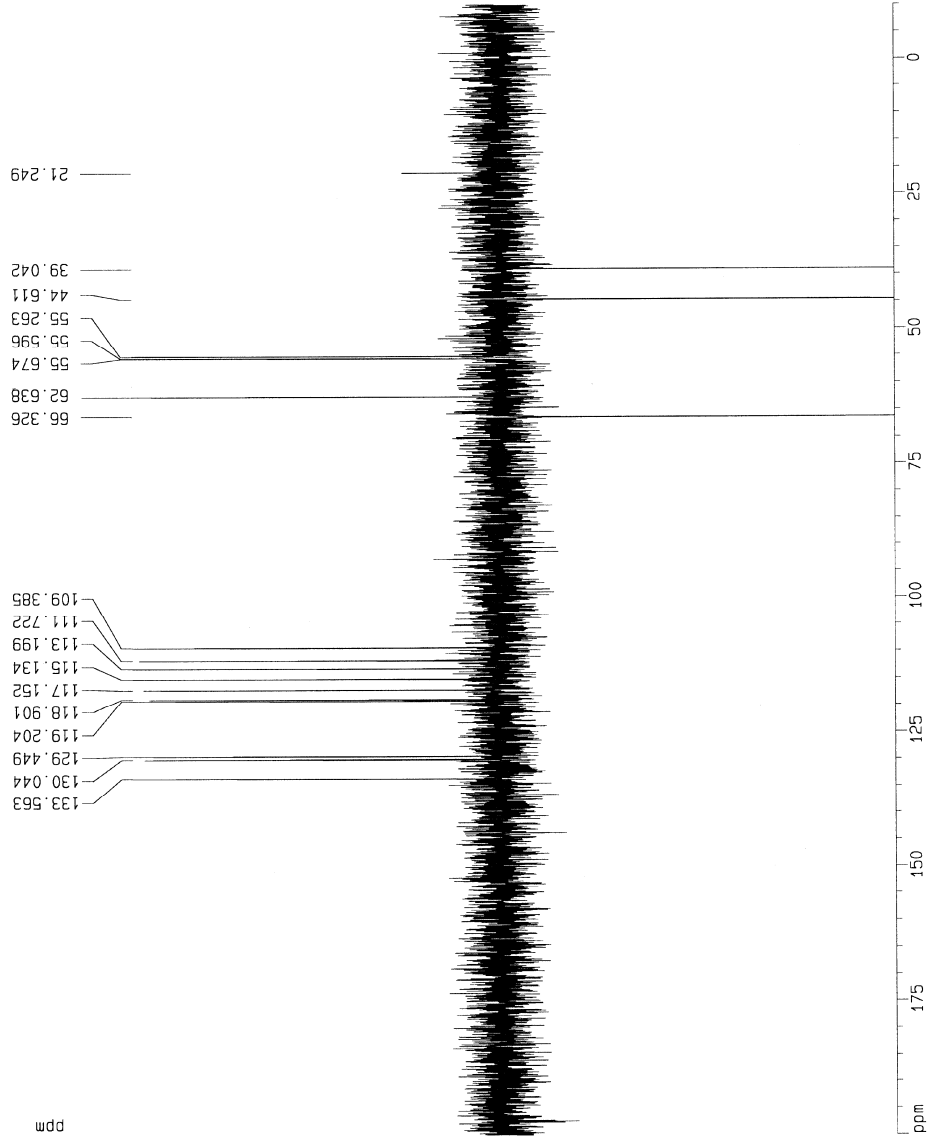

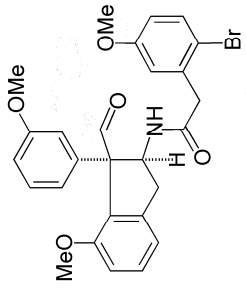

Current Data Parameters  
 NAME jh-02-19-05  
 EXPNO 4  
 PROCNO 1

F2 - Acquisition Parameters  
 Date\_ 20060218  
 Time 17:11  
 INSTRUM spect  
 PROBHD 5 mm Multinu  
 PULPROG zg30  
 TD 24630  
 SOLVENT CDCl3  
 NS 16  
 DS 2  
 SWH 6172.833 Hz  
 FIDRES 0.250014 Hz  
 AQ 1.9999400 sec  
 RG 128  
 DK 81.000 usec  
 DE 6.00 usec  
 TE 300.0 K  
 D1 1.00000000 sec

\*\*\*\*\* CHANNEL f1 \*\*\*\*\*  
 NUC1 1H  
 P1 9.60 usec  
 PL1 -6.00 dB  
 SF01 300.1316534 MHz

F2 - Processing parameters  
 S1 32768  
 SF 300.1300124 MHz  
 WDW no  
 SSB 0  
 LB 0.00 Hz  
 GB 0  
 PC 1.00

1D NMR plot parameters  
 CK 20.00 cm  
 F1P 10.000 ppm  
 F1 3001.30 Hz  
 F2P -0.500 ppm  
 F2 -150.07 Hz  
 PPMCM 0.52500 ppm/cm  
 HZCM 157.56925 Hz/cm

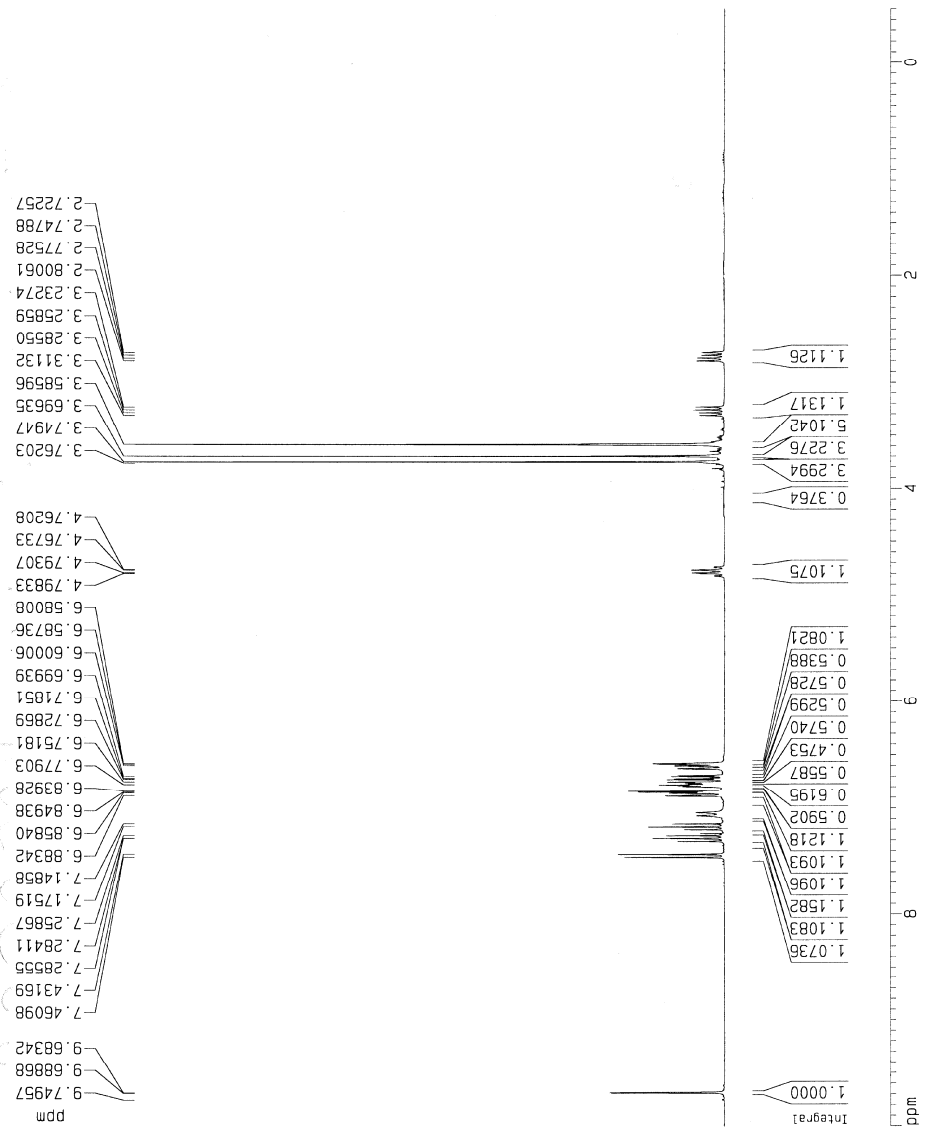

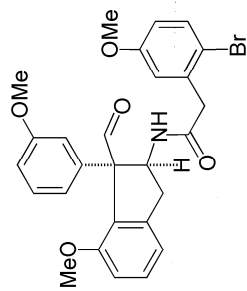

Current: Data Parameters  
 NAME jh1-02-04-06  
 EXPNO 2  
 PROCNO 1

F2 - Acquisition Parameters  
 Date\_ 20061204  
 Time 22.47  
 INSTRUM spect  
 PROBHD 5 mm BBI 1H-B  
 PULPROG zgpg30  
 TO 65536  
 SOLVENT CDCl3  
 NS 200  
 DS 4  
 SWH 25125.663 Hz  
 FIDRES 0.36387 Hz  
 AQ 1.3042164 sec  
 RG 6584  
 DK 19.500 usec  
 DE 6.00 usec  
 TE 300.0 K  
 D1 2.0000000 sec  
 d11 0.0300000 sec  
 d12 0.0002000 sec

\*\*\*\*\* CHANNEL f1 \*\*\*\*\*  
 NUC1 13C  
 P1 16.35 usec  
 PL1 -6.00 dB  
 SFO1 100.6231569 MHz

\*\*\*\*\* CHANNEL f2 \*\*\*\*\*  
 CPDPRG2 waltz16  
 NUC2 1H  
 PCPD2 114.00 usec  
 PL2 0.00 dB  
 PL12 24.00 dB  
 PL13 24.00 dB  
 SFO2 400.1316005 MHz

F2 - Processing parameters  
 SI 32768  
 SF 100.6121530 MHz  
 KDM EM  
 SSB 0  
 LB 1.00 Hz  
 GB 0  
 PC 1.40

1D NMR Plot parameters  
 CX 20.00 cm  
 F1P 200.000 ppm  
 F2P 20122.95 Hz  
 F2 -10.000 ppm  
 PPKCM -1006.13 Hz  
 HZCM 10.50000 ppm/cm  
 1056.43396 Hz/cm

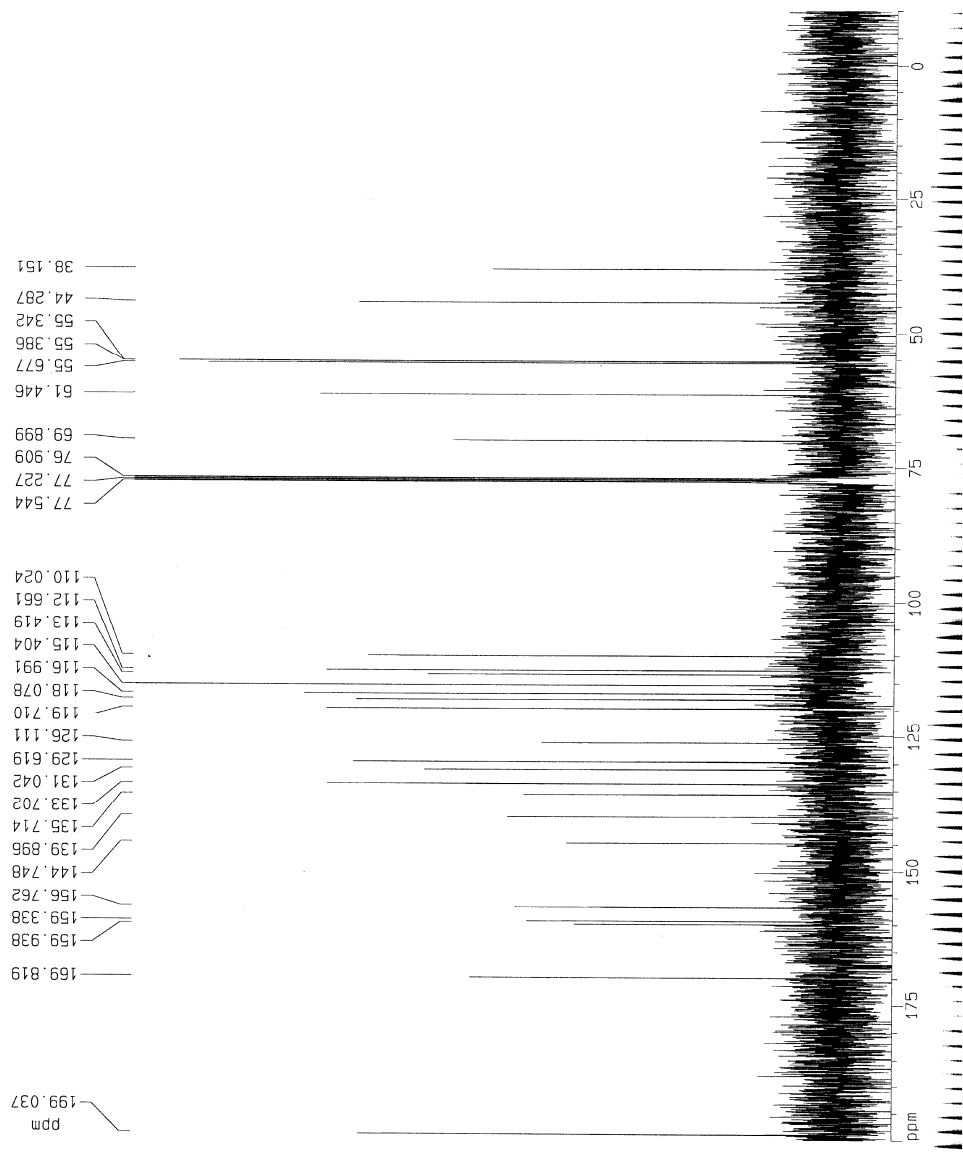

199.037  
 169.819  
 159.938  
 159.338  
 156.762  
 144.748  
 139.896  
 135.714  
 133.702  
 131.042  
 129.619  
 126.111  
 119.710  
 118.078  
 116.991  
 115.404  
 113.419  
 112.661  
 110.024  
 77.544  
 77.227  
 76.909  
 69.899  
 61.446  
 55.677  
 55.386  
 55.342  
 44.287  
 38.151

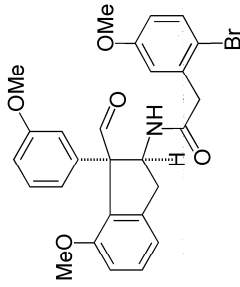

Current Data Parameters  
 NAME jh-02-04-36  
 EXPNO 3  
 PROCNO 1

F2 - Acquisition Parameters  
 Date\_ 20060224  
 Time 23:00  
 INSTRUM spect  
 PROBHD 5 mm BBI 1H-B  
 PULPROG zgpg30  
 TD 65536  
 SOLVENT CDCl3  
 NS 100  
 DS 4  
 SWH 23950.614 Hz  
 FIDRES 0.38575 Hz  
 AQ 1.304735 sec  
 RG 16324  
 DW 20.850 usec  
 DE 6.00 usec  
 TE 300.0 K  
 CNST12 145.0000000  
 D1 2.00000000 sec  
 d2 0.00344828 sec  
 d12 0.00002000 sec  
 DELTA 0.00002052 sec

\*\*\*\*\* CHANNEL f1 \*\*\*\*\*  
 NUC1 13C  
 P1 16.35 usec  
 PL1 -6.00 dB  
 SF01 100.627895 MHz

\*\*\*\*\* CHANNEL f2 \*\*\*\*\*  
 CPDPRG2 waltz16  
 NUC2 1H  
 P3 7.90 usec  
 PL3 15.00 usec  
 PL4 14.00 usec  
 PL2 0.00 dB  
 PL12 1.00 dB  
 PL10 1.00 dB  
 SF02 400.1315003 MHz

F2 - Processing parameters  
 SI 32768  
 SF 100.6127531 MHz  
 K0M EM  
 SSB 0  
 LB 1.00 Hz  
 GB 0  
 PC 1.40

1D NMR plot parameters  
 CX 20.00 cm  
 F1P 200.000 ppm  
 F1 2032.55 Hz  
 F2P -10.000 ppm  
 F2 -1005.13 Hz  
 PPKM 10.50000 ppm/cm  
 HZUM 1055.43550 Hz/cm

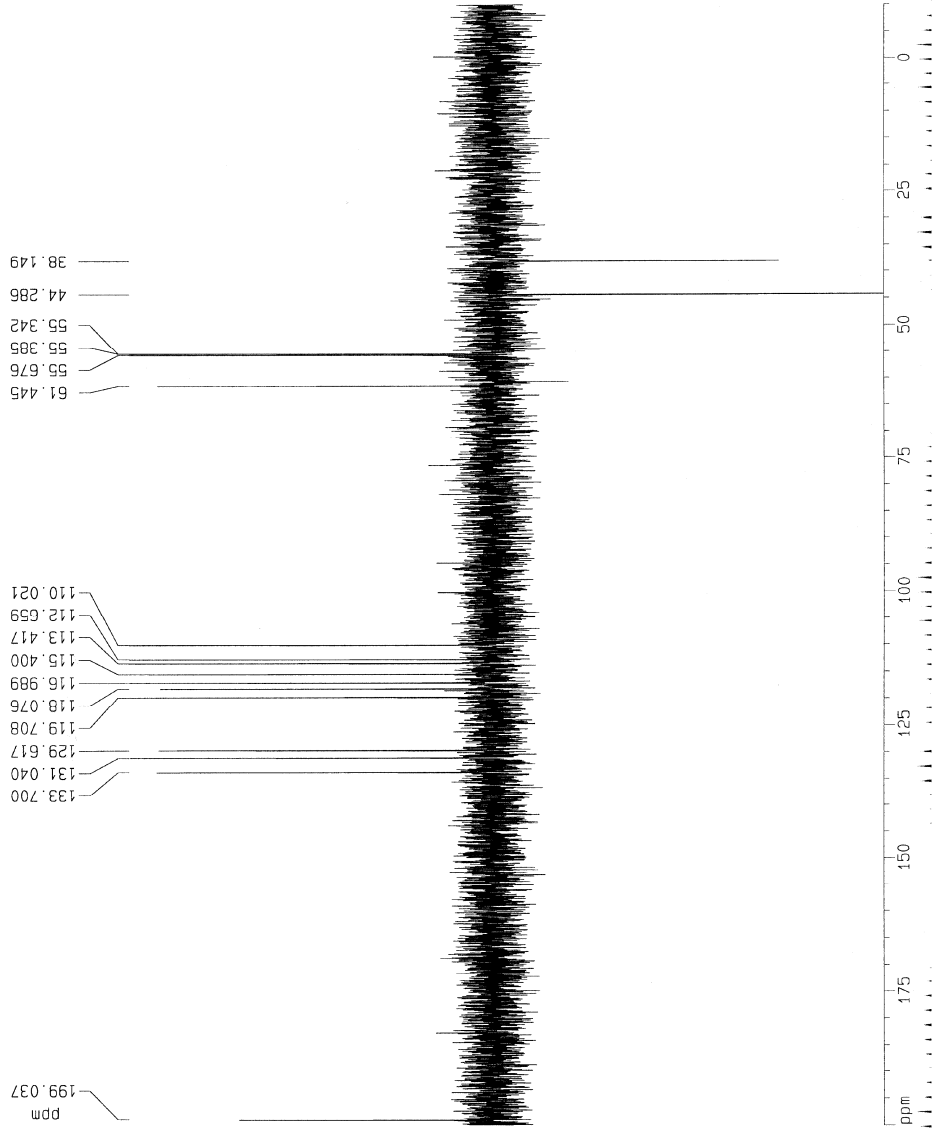



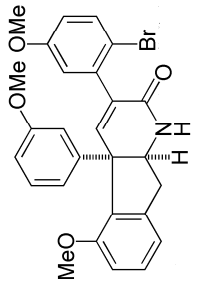

Current Data Parameters  
 NAME jh1-03-05-06  
 EXPNO 4  
 PROCNO 1

F2 - Acquisition Parameters  
 Date\_ 20060305  
 Time 21.02  
 INSTRUM spect  
 PROBHD 5 mm BBI 1H-B  
 PULPROG zg30  
 TD 33110  
 SOLVENT CDCl3  
 NS 16  
 DS 2  
 SWH 6278.146 Hz  
 FIDRES 0.250019 Hz  
 AQ 1.9998940 sec  
 RG 71.8  
 DW 60.400 usec  
 DE 5.00 usec  
 TE 300.0 K  
 D1 1.00000000 sec

\*\*\*\*\* CHANNEL f1 \*\*\*\*\*  
 NUC1 1H  
 P1 6.45 usec  
 PL1 0.00 dB  
 SFO1 400.1324710 MHz

F2 - Processing parameters  
 SI 32768  
 SF 400.1300171 MHz  
 WDW no  
 SSB 0  
 LB 0.00 Hz  
 GB 0  
 PC 1.00

1D NMR pict parameters  
 CX 20.00 cm  
 F1P 10.000 ppm  
 F1 4001.30 Hz  
 F2P -0.500 ppm  
 F2 -200.07 Hz  
 PPMCM 0.52500 ppm/cm  
 HZCM 210.06925 Hz/cm

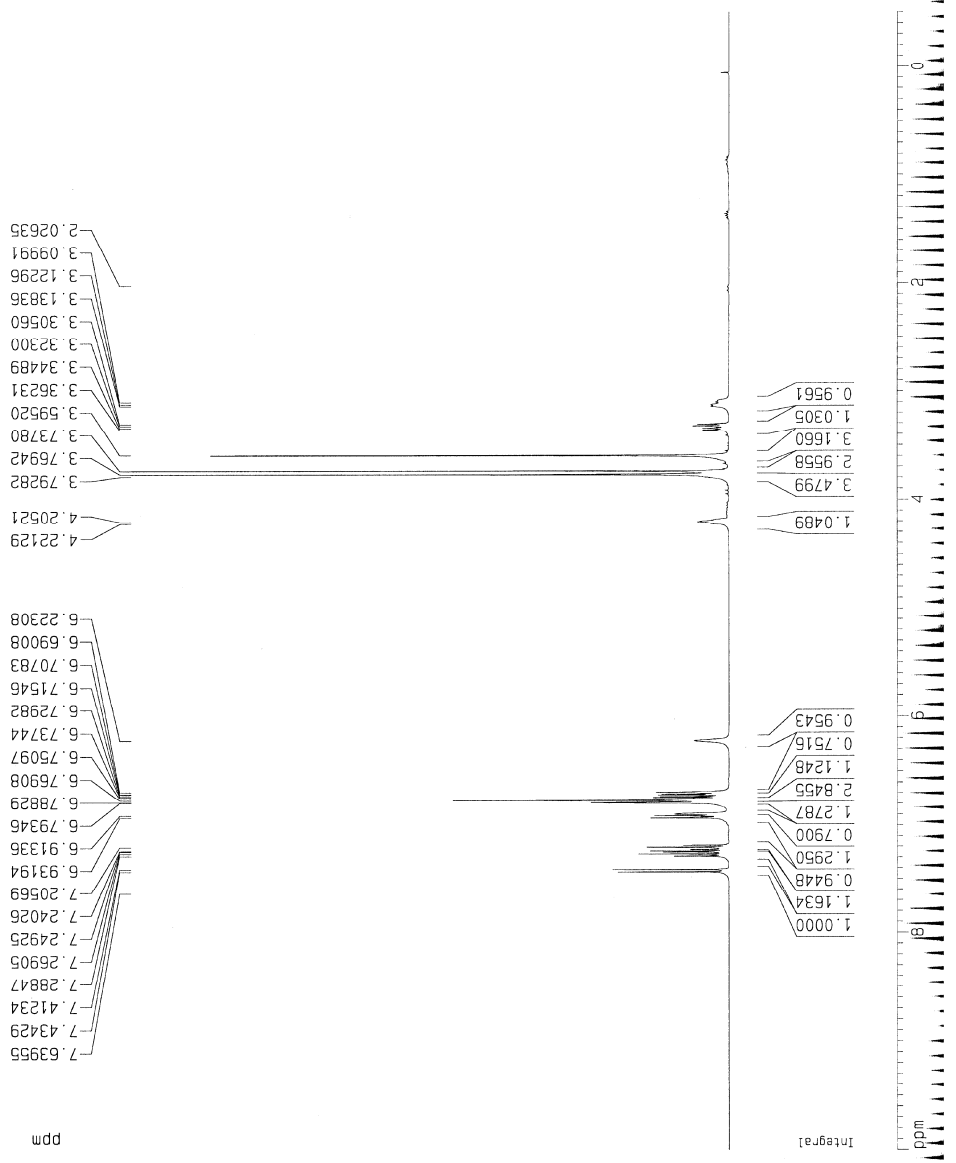

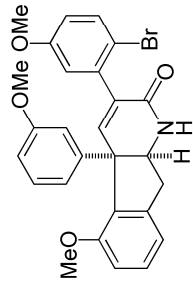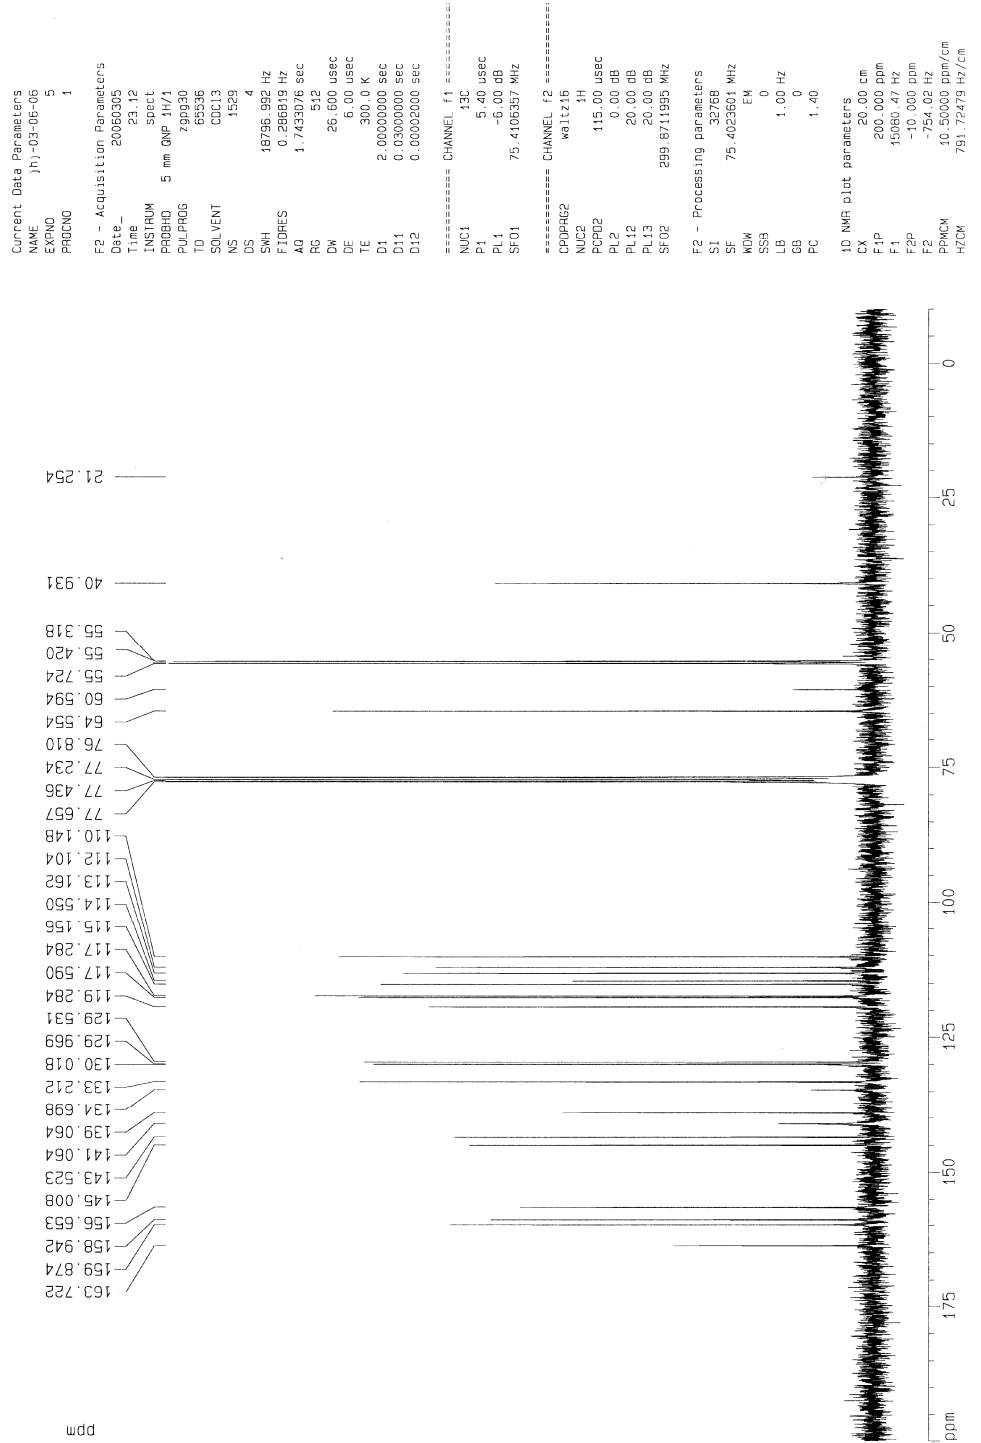

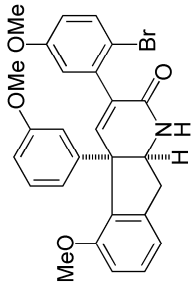

Current Data Parameters  
 NAME jh-03-06-06  
 EXPNO 6  
 PROCNO 1

F2 - Acquisition Parameters  
 Date\_ 20060306  
 Time 0.49  
 INSTRUM spect  
 PROBHD 5 mm QNP 1H/1  
 PULPROG zgpg30  
 TD 65536  
 SOLVENT CDCl3  
 NS 381  
 DS 4  
 SWH 17985.611 Hz  
 FIDRES 0.274439 Hz  
 AQ 1.8219509 sec  
 RG 16384  
 DW 27.860 usec  
 DE 6.60 usec  
 TE 300.0 K  
 D1 2.0000000 sec  
 D2 0.00357143 sec  
 D12 0.0000200 sec  
 DELTA 0.0000669 sec

===== CHANNEL f1 =====  
 NUC1 13C  
 P1 5.70 usec  
 P2 10.60 usec  
 PL1 -6.00 dB  
 SFO1 75.4098017 MHz

===== CHANNEL f2 =====  
 CPDPRG2 waltz16  
 NUC2 1H  
 P3 12.40 usec  
 P4 24.60 usec  
 PCPD2 115.00 usec  
 PL2 0.00 dB  
 PL12 20.00 dB  
 SFO2 299.071965 MHz

F2 - Processing parameters  
 SI 32768  
 SF 75.4023612 MHz  
 WDW EM  
 SSB 0  
 LB 1.00 Hz  
 GB 0  
 PC 1.40

1D NMR plot parameters  
 CX 20.00 cm  
 F1P 200.000 ppm  
 F1 15080.47 Hz  
 F2P -10.000 ppm  
 F2 -754.02 Hz  
 PPKICK 10.50000 ppm/cm  
 HZCK 791.72479 Hz/cm

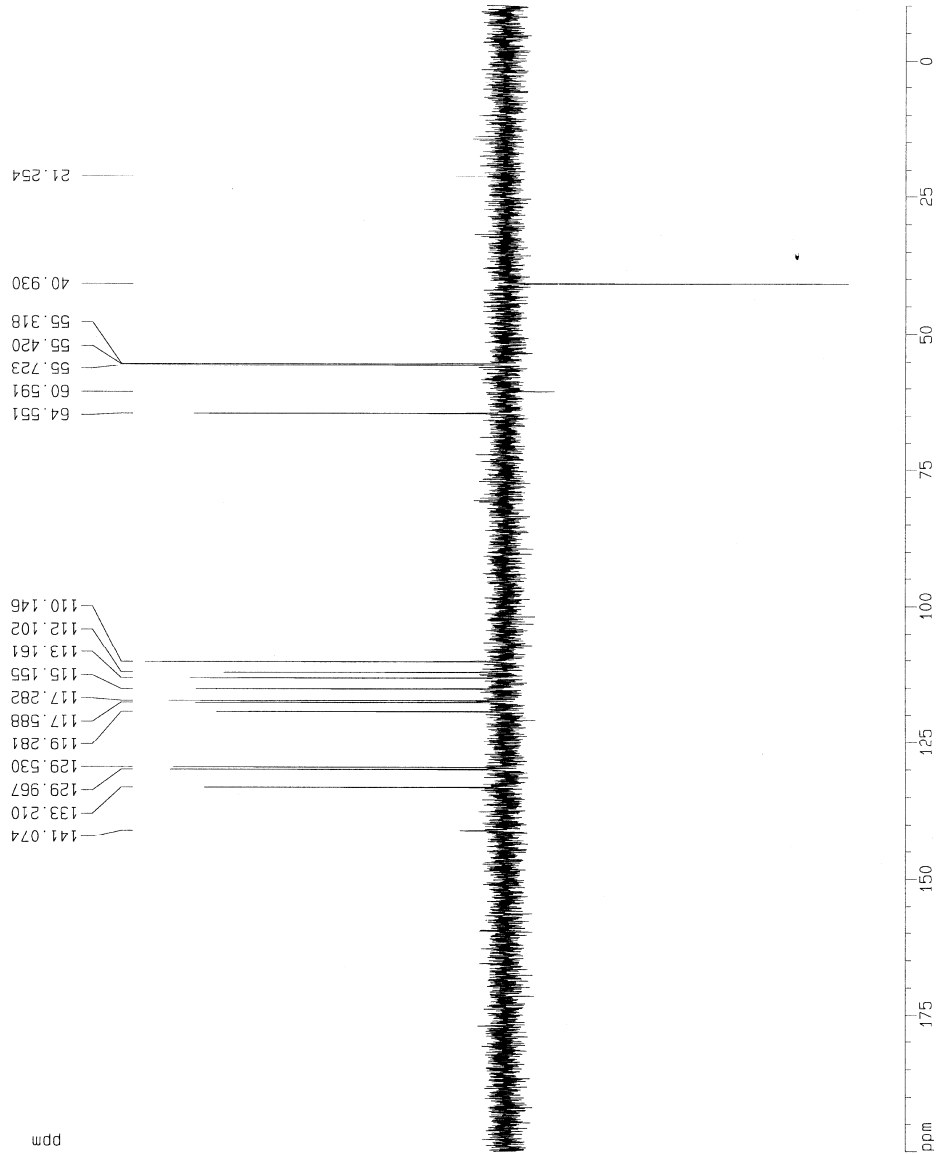

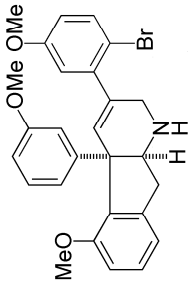

Current Data Parameters  
 NAME jh1-03-05-06  
 EXPNO 1  
 PROCNO 1

F2 - Acquisition Parameters  
 Date\_ 20060305  
 Time 20.14  
 INSTRUM spect  
 PROBHD 5 mm BBI 1H-B  
 PULPROG zg30  
 TD 35110  
 SOLVENT CDCl3  
 NS 16  
 DS 2  
 SWH 8276.146 Hz  
 FIDRES 0.250019 Hz  
 AQ 1.9598940 sec  
 RG 401.6  
 DW 60.400 usec  
 DE 6.00 usec  
 TE 300.0 K  
 D1 1.00000000 sec

===== CHANNEL f1 =====  
 NUC1 1H  
 P1 6.45 usec  
 PL1 0.00 dB  
 SFO1 400.1324710 MHz

F2 - Processing parameters  
 SI 32768  
 SF 400.1300174 MHz  
 NDM no  
 SSB 0  
 LB 0.00 Hz  
 GB 0  
 PC 1.00

1D NMR plot parameters  
 CX 20.00 cm  
 F1P 10.000 ppm  
 F1 4001.30 Hz  
 F2P -0.500 ppm  
 F2 -200.07 Hz  
 PPMCM 0.52500 ppm/cm  
 HZCM 210.06825 Hz/cm

7.42125  
7.39948  
7.24028  
7.15625  
6.93455  
6.80468  
6.79975  
6.75274  
6.74893  
6.74644  
6.74238  
6.73348  
6.72962  
6.72726  
6.72434  
6.71633  
6.68216  
6.66034  
6.33725  
3.81322  
3.80836  
3.76913  
3.76423  
3.74780  
3.73849  
3.67211  
3.66063  
3.65481  
3.64329  
3.62557  
3.60707  
3.52771  
3.48373  
3.06746  
3.04913  
2.94746

1.0000  
1.4116  
1.0262  
1.0644  
1.0939  
4.1495  
0.9621  
0.9337  
1.9900  
3.2228  
2.4444  
1.9162  
2.7327  
0.9674  
1.0376  
0.9815

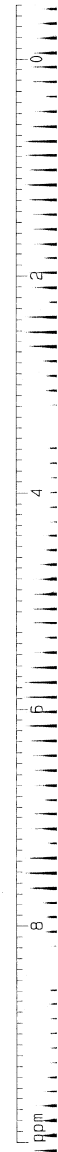

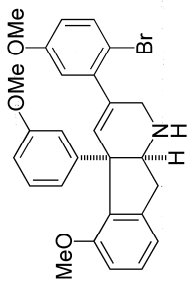

Current Data Parameters  
 NAME |h|-03-05-06  
 EXPNO 2  
 PROCNO 1

F2 - Acquisition Parameters  
 Date\_ 20060305  
 Time 20.25  
 INSTRUM spect  
 PROBHD 5 mm BBI 1H-6  
 PULPROG zgpg30  
 TD 65536  
 SOLVENT CDCl3  
 NS 501  
 DS 4  
 SWH 25125.625 Hz  
 FIDRES 0.385387 Hz  
 AQ 1.3642184 sec  
 RG 16384  
 DW 19.900 usec  
 DE 6.00 usec  
 TE 300.2 K  
 D1 2.0000000 sec  
 d11 0.0300000 sec  
 d12 0.0000200 sec

\*\*\*\*\* CHANNEL f1 \*\*\*\*\*  
 NUC1 13C  
 P1 16.35 usec  
 PL1 -6.00 dB  
 SFO1 100.6237559 MHz

\*\*\*\*\* CHANNEL f2 \*\*\*\*\*  
 CPDPRG2 waltz16  
 NUC2 1H  
 PCPD2 114.00 usec  
 PL2 0.00 dB  
 PL12 24.00 dB  
 PL13 24.00 dB  
 SF02 400.1316005 MHz

F2 - Processing parameters  
 SI 32768  
 SF 100.6127507 MHz  
 WDW EN  
 SSB 0  
 LB 1.00 Hz  
 GB 0  
 PC 1.40

1D NMR pict parameters  
 CX 20.00 cm  
 FAP 200.000 ppm  
 F1 20132.55 Hz  
 F2 10.000 ppm  
 F5 -1006.13 Hz  
 PPKM 10.3000 ppm/cm  
 ZM 1058.131 Hz

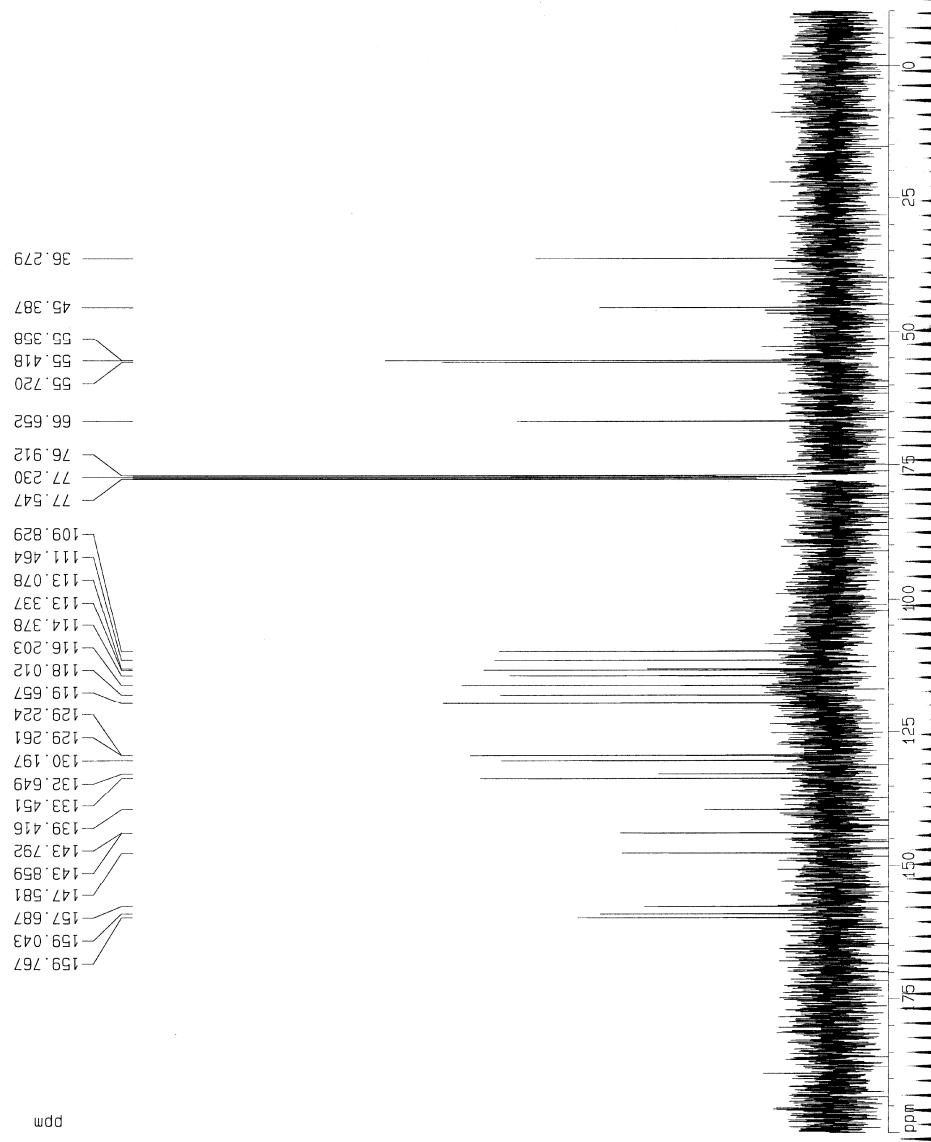

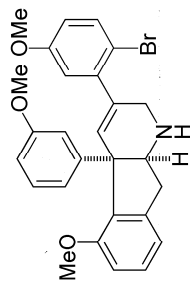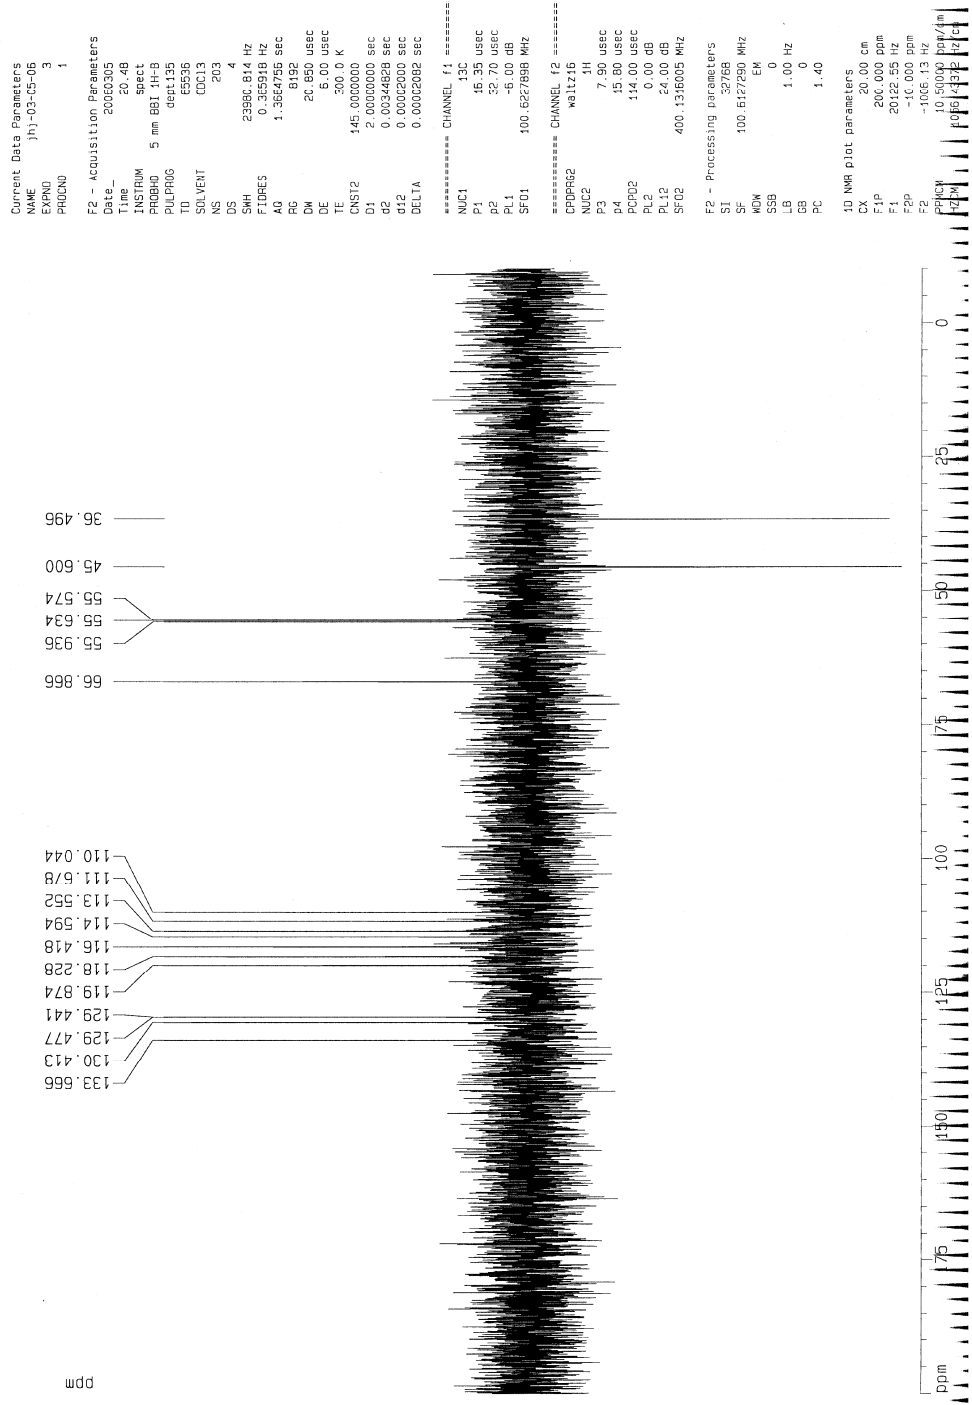

Supplement: NIHMS61013-supplement-si20060409_081.pdf [file NIHMS61013-supplement-si20060409_081.pdf]
